# Supplementary material for: Re-evaluating the Cu K pre-edge XAS transition in complexes with covalent metal–ligand interactions
Source: PubMed Central journal article supplement — Chem Sci. 2015 Feb 20;6(4):2474–87. doi: 10.1039/c4sc03294b (PMC5647745; doi:10.1039/c4sc03294b), 2015-02-20
Supplement: SC-006-C4SC03294B-s001.pdf [file SC-006-C4SC03294B-s001.pdf]

Supporting Information for:

## Re-evaluating the Cu Pre-K-edge XAS Transition in Complexes with Covalent Metal-Ligand Interactions

Neil C. Tomson,\* Kamille D. Williams, Xuliang Dai, Stephen Sproules, Serena DeBeer, Timothy H. Warren,\* and Karl Wieghardt\*

|              |                                                                                                       |     |
|--------------|-------------------------------------------------------------------------------------------------------|-----|
| <b>SI 1</b>  | Experimental details                                                                                  | S2  |
| <b>SI 2</b>  | Calculated and experimental bond lengths for complexes <b>1-8</b>                                     | S8  |
| <b>SI 3</b>  | DFT geometry optimization and single-point energies                                                   | S8  |
| <b>SI 4</b>  | Fits and 2 <sup>nd</sup> derivatives of experimental Cu K-edge XAS data                               | S9  |
| <b>SI 5</b>  | Comparison of calculated ( <b>7</b> <sup>†</sup> ) and experimental ( <b>4</b> ) XAS spectra          | S14 |
| <b>SI 6</b>  | Calculated and experimental XAS spectra for (Tp')Cu(O <sub>2</sub> ), <b>6</b>                        | S15 |
| <b>SI 7</b>  | Calculated XAS spectrum for [Me2NN]CuF <sub>2</sub> , <b>9</b>                                        | S16 |
| <b>SI 8</b>  | Relaxed coordinate scan of TpCu(O <sub>2</sub> ) and calculated Cu pre-K-edge XAS transition energies | S17 |
| <b>SI 9</b>  | Comparison of DFT and multiconfiguration <i>ab initio</i> methods                                     | S18 |
| <b>SI 10</b> | Broken-symmetry DFT computational results for <b>1'</b>                                               | S18 |
| <b>SI 11</b> | CASSCF computational results                                                                          | S19 |
| <b>SI 12</b> | MR-DDCI3 computational results                                                                        | S26 |
| <b>SI 13</b> | Orthogonal valence bond (OVB) analyses of CASSCF and MR-DDCI3 computational results                   | S30 |
| <b>SI 14</b> | Plot relating the OVB-derived % Cu(III)-character to the experimental pre-K-edge transition energy    | S33 |
| <b>SI 15</b> | Comparison of BP86 and B3LYP functionals for calculating pre- and rising-edge transitions             | S34 |
| <b>SI 16</b> | Comparison of calculated Cu <sub>1s</sub> energies to experimental and computational XANES data       | S35 |
| <b>SI 17</b> | Plots of calc. Cu-1s energies to experimental XAS data at various normalized absorption intensities   | S37 |
| <b>SI 18</b> | Example input files for BP86 geom. opt., B3LYP single-point, and CASSCF/MR-DDCI3 computations         | S38 |
| <b>SI 19</b> | Atomic coordinates from geometry optimization calculations                                            | S40 |
| <b>SI 20</b> | References                                                                                            | S48 |

### SI 1.1 Experimental details.

**General Synthetic and Characterization Procedures and Instrumentation Details.** All experiments were carried out in a dry nitrogen atmosphere using an MBraun glovebox and/or standard Schlenk techniques. 4A molecular sieves were activated *in vacuo* at 180 °C for 24 h. Diethyl ether and tetrahydrofuran (THF) were first sparged with nitrogen and then dried by passage through activated alumina columns. Pentane was first washed with conc. HNO<sub>3</sub> / H<sub>2</sub>SO<sub>4</sub> to remove olefins, stored over CaCl<sub>2</sub> and then distilled before use from sodium/benzophenone. Benzene, toluene, fluorobenzene and ethylbenzene were purchased anhydrous and stored over 4A molecular sieves. All solvents (except fluorobenzene) were tested before use with a drop of sodium benzophenone ketyl in THF solution. All deuterated solvents were sparged with nitrogen, dried over activated 4A molecular sieves and stored under nitrogen. Celite was dried overnight at 200 °C under vacuum. <sup>1</sup>H, <sup>13</sup>C, and <sup>19</sup>F NMR spectra were recorded on a Varian 400 MHz Spectrometer (400, 100.54, 376.14, respectively) at Georgetown. All NMR spectra were recorded at room temperature unless otherwise noted and were indirectly referenced to residual solvent signals or TMS as internal standards. Fluorobenzene (δ -113.15 ppm) in THF-*d*<sub>8</sub> was used as an internal standard for <sup>19</sup>F NMR experiments. UV-Vis spectra were measured at Georgetown on a Varian Cary 50 spectrophotometer, using air-tight cuvettes with a Teflon stopcock. Elemental analyses were performed on a Perkin-Elmer PE2400 microanalyzer at Georgetown. All reagents were obtained commercially unless otherwise noted. The recently reported Ar<sup>F</sup>N=NAr<sup>F</sup> (Ar<sup>F</sup> = 3,5-(CF<sub>3</sub>)<sub>2</sub>C<sub>6</sub>H<sub>2</sub>)<sup>1</sup> was prepared by a modification of the method reported for the synthesis of C<sub>6</sub>F<sub>5</sub>N=NC<sub>6</sub>F<sub>5</sub><sup>2</sup> while [Me<sub>2</sub>NN]Cu(ethylene)<sup>3</sup> was prepared according to literature procedures.

**Ar<sup>F</sup>N=NAr<sup>F</sup> (Ar<sup>F</sup> = 3,5-bis(trifluoromethyl)phenyl).** Adopted from synthesis of C<sub>6</sub>F<sub>5</sub>N=NC<sub>6</sub>F<sub>5</sub>.<sup>2</sup> 3,5-bis(trifluoromethyl)aniline (3.30 g, 14.0 mmol) and 10 % aqueous solution of NaOCl were mixed and stirred vigorously for 16 h. The organic component was extracted with three 40 mL portions of ether. The combined organic extracts were washed with water (5 × 30 mL) to remove all traces of chloride. The ether extracts were dried over MgSO<sub>4</sub> and concentrated to give an orange oil. Recrystallization from ethanol afforded 1.72 g (53 % yield) of orange crystals. Spectroscopic data match those reported by Takeda *et al.*<sup>1</sup>

**[Me<sub>2</sub>NN]Cu(η<sup>2</sup>-Ar<sup>F</sup>N=NAr<sup>F</sup>) (3).** A solution of Ar<sup>F</sup>N=NAr<sup>F</sup> (0.110 g, 0.33 mmol) in 5 mL of toluene was added dropwise to a solution of [Me<sub>2</sub>NN]Cu(ethylene) (0.130 g, 0.34 mmol) in 5 mL of toluene, the solution color changed from yellow to red-brown immediately. After stirred overnight, the volatiles were removed in vacuo and the residue was extracted with pentane (15 mL). The mixture was filtered through Celite, and the filtrate was concentrated and cooled to -35 °C to afford 0.180 g (78 %) red-orange crystals suitable for X-ray diffraction. <sup>1</sup>H NMR (THF-*d*<sub>8</sub>, RT, 400MHz): δ 7.96 (s, 2H, *p*-H-diazene), 7.48 (s, 4H, *o*-H-diazene), 7.12 (m (broad), 6H, Ar-H), 5.03 (s, 1H, H-backbone), 2.46 (s, 6H, Me-backbone), 1.53 (s, 12H, Me-Ar) <sup>13</sup>C NMR (THF-*d*<sub>8</sub>, RT): 165.21, 153.95, 148.44, 133.31, 132.56, 129.72, 126.07, 122.52, 97.72, 23.25 <sup>19</sup>F NMR (THF-*d*<sub>8</sub>, RT): δ -62.03. Anal. Calc'd for C<sub>37</sub>H<sub>41</sub>N<sub>4</sub>F<sub>12</sub>Cu: C, 53.99; H, 3.80; N, 6.81. Found: C, 53.73; H, 3.77, N, 6.66.

Use of a non-arene solvent simplifies the solution characterization for [Me<sub>2</sub>NN]Cu(η<sup>2</sup>-Ar<sup>F</sup>N=NAr<sup>F</sup>) (3) since it appears that the electron-poor diazene may be displaced by an aromatic solvent such as benzene-*d*<sub>6</sub> to give free diazene Ar<sup>F</sup>N=NAr<sup>F</sup> and the solvent species [Me<sub>2</sub>NN]Cu(benzene).

**Acquisition of X-ray absorption data.** The compounds [Me<sub>2</sub>NN]Cu(η<sup>2</sup>-ONAr) (2),<sup>4</sup> [Me<sub>2</sub>NN]Cu(η<sup>2</sup>-CH<sub>2</sub>=CHPh) (4),<sup>3</sup> and [Me<sub>2</sub>NN]Cu(κ<sup>2</sup>-O<sub>2</sub>N<sub>2</sub>Ar) (5)<sup>4</sup> (Ar = 3,5-Me<sub>2</sub>C<sub>6</sub>H<sub>3</sub>) were prepared according to literature procedures. [Me<sub>2</sub>NN]Cu(η<sup>2</sup>-Ar<sup>F</sup>N=NAr<sup>F</sup>) (3) was prepared by addition of Ar<sup>F</sup>N=NAr<sup>F</sup><sup>5</sup> to [Me<sub>2</sub>NN]Cu(η<sup>2</sup>-CH<sub>2</sub>=CH<sub>2</sub>).<sup>3</sup> The Cu K-edge X-ray absorption spectra (XAS) of compounds 2-5 were collected at the Stanford Synchrotron Radiation Lightsource (SSRL) at beamline 7-3 under ring conditions of 3 GeV and 60-100 mA. A Si(220) double-crystal monochromator was used for energy selection, and a Rh-coated mirror (set to an energy cutoff of 13 keV) was used for harmonic rejection. Incident and transmitted X-ray intensities were monitored using nitrogen-filled ionization chambers. X-ray absorption was measured in transmittance mode. During data collection, samples were maintained at a temperature of approximately 10 K using an Oxford Instruments liquid helium flow cryostat. Internal energy calibrations were performed by simultaneous measurement of the Cu reference foil placed between the second and third ionization chamber with the inflection point assigned at 8980.3 eV. Data represent five scan averages. The data were calibrated and averaged using EXAFSPAK.<sup>6</sup> Pre-edge subtraction and splining were carried out using PYSPLINE.<sup>7</sup> A three-region cubic spline of order 2, 3, 3 was used to model

the smooth background above the edge. Normalization of the data was achieved by subtraction of the spline and normalization of the post-edge region to a value of 1. X-ray absorption data from ref. XX was used in the analysis of [ $\text{Pr}_2\text{NN}$ ] $\text{Cu}(\eta^2\text{-O}_2)$  (**1**).

**Data reduction and analysis.** The intensities and energies of pre-edge features were determined by a procedure analogous to that reported previously.<sup>8</sup> Fits were performed over three energy ranges: 8976-8983, 8976-8984, and 8976-8985 eV. In addition to the initial pre-edge feature, a second, low-intensity feature was identified in the spectra for **2**, **3**, and **5**. These peaks were incorporated in the least-squares fits of the 8976-8985 eV energy range, then the parameters obtained for these additional spectral features were included, but held constant, during least-squares fits of smaller spectral ranges. The intense, rising-edge feature of **4** at 8984.3 eV was treated similarly. Two additional low-intensity features were observed in the spectrum of **5** at 8980.7 and 8983.3 eV, which correspond to the two low-intensity pre-edge transitions for compound **2**, the synthetic precursor to **5**. The higher-energy peak was treated as described above; line-shape parameters for the 8980.7 eV peak were included in all least-squares fits to the data. Plots of the second-derivatives of experimental data were smoothed using a three-point adjacent-averaging scheme.

**Computational Procedures.** All DFT and *ab initio* calculations were performed with the ORCA electronic structure package.<sup>9</sup> The DFT calculations were carried out at the BP86 and B3LYP<sup>10-12</sup> levels of theory, using def2- variants of the all-electron Gaussian basis sets of split-valence (def2-SVP) and triple-valence (def2-TZVP) quality as developed by the Ahlrichs group.<sup>13</sup> The pure-DFT BP86 functional was used for geometry optimization calculations due to its superior performance in predicting geometric features; the hybrid-DFT functional B3LYP was used for subsequent calculations owing to its preferred use in predicting spectroscopic features. The calculations employed the resolution of identity (RI-J) algorithm for the computation of the Coulomb terms and the 'chain of spheres exchange' (COSX) algorithm for the calculation of the exchange terms.<sup>14</sup> For the fitting basis in the RI-J treatment, the 'def2' fit basis sets were used.<sup>15</sup>

The SCF calculations were tightly converged ( $1 \times 10^{-8} E_h$  in energy,  $1 \times 10^{-7} E_h$  in the density change, and  $5 \times 10^{-7}$  in the maximum element of the DIIS error vector). In all cases the geometries were considered converged after *i*) the energy change was less than  $1 \times 10^{-6} E_h$ , *ii*) the gradient norm and maximum gradient element were smaller than  $3 \times 10^{-4} E_h\text{-Bohr}^{-1}$  and  $1 \times 10^{-4} E_h\text{-Bohr}^{-1}$ , respectively, and *iii*) the root-mean square and maximum displacements of all atoms were smaller than  $6 \times 10^{-4}$  Bohr and  $1 \times 10^{-3}$  Bohr, respectively. Geometry optimization calculations on the full molecules were carried out on redundant internal coordinates without imposing symmetry constraints. Truncated forms of complexes **1-6** were obtained as described in the text. Canonical orbital plots (electron density iso-surface threshold = 0.05) were generated with the program Molekel, v4.3.<sup>16</sup>

Time-dependent DFT (TD-DFT) calculations using the B3LYP functional were performed to predict the transitions in the pre-edge region of the Cu K-edge XAS spectra.<sup>17,18</sup> The basis-sets were chosen to match the basis sets used for the single-point ground state calculations, except for Cu, for which the CP(PPP) basis set<sup>19</sup> was implemented. The obtained Cu K-edge transition energies were shifted by a constant value of 195.55 eV to ease comparison with the experimental spectra.

MRCI calculations were performed by employing the state-averaged complete active space self-consistent field (SA-CASSCF) method for the calculation of the zero-order wavefunction. In individually selecting MRCI calculations, a test configuration was kept if its perturbation energy  $H_{i0}^2/\Delta E$  was larger than a certain threshold  $T_{\text{sel}}$  ( $H_{i0}$  is the CI matrix element between the test configuration and multiconfigurational 0th order wavefunction;  $\Delta E$  is the energy difference calculated with the Möller-Plesset (MP) 0<sup>th</sup> order Hamiltonian). The values reported below were obtained with  $T_{\text{sel}} = 10^{-6} E_h$ . The energetic effects of unselected CSFs were estimated by second-order Rayleigh-Schrödinger theory using Möller-Plesset partitioning. We have employed the difference dedicated CI (MR-DDCI3) approach of Caballol, Malrieu and co-workers in this study.<sup>20</sup>

SI 1.2 Beer's law plot of  $[\text{Me}_2\text{NN}]\text{Cu}(\eta^2\text{-Ar}^{\text{F}}\text{N}=\text{NAr}^{\text{F}})$  (3) in  $\text{Et}_2\text{O}$  at  $25^\circ\text{C}$  monitored at 421 nm.

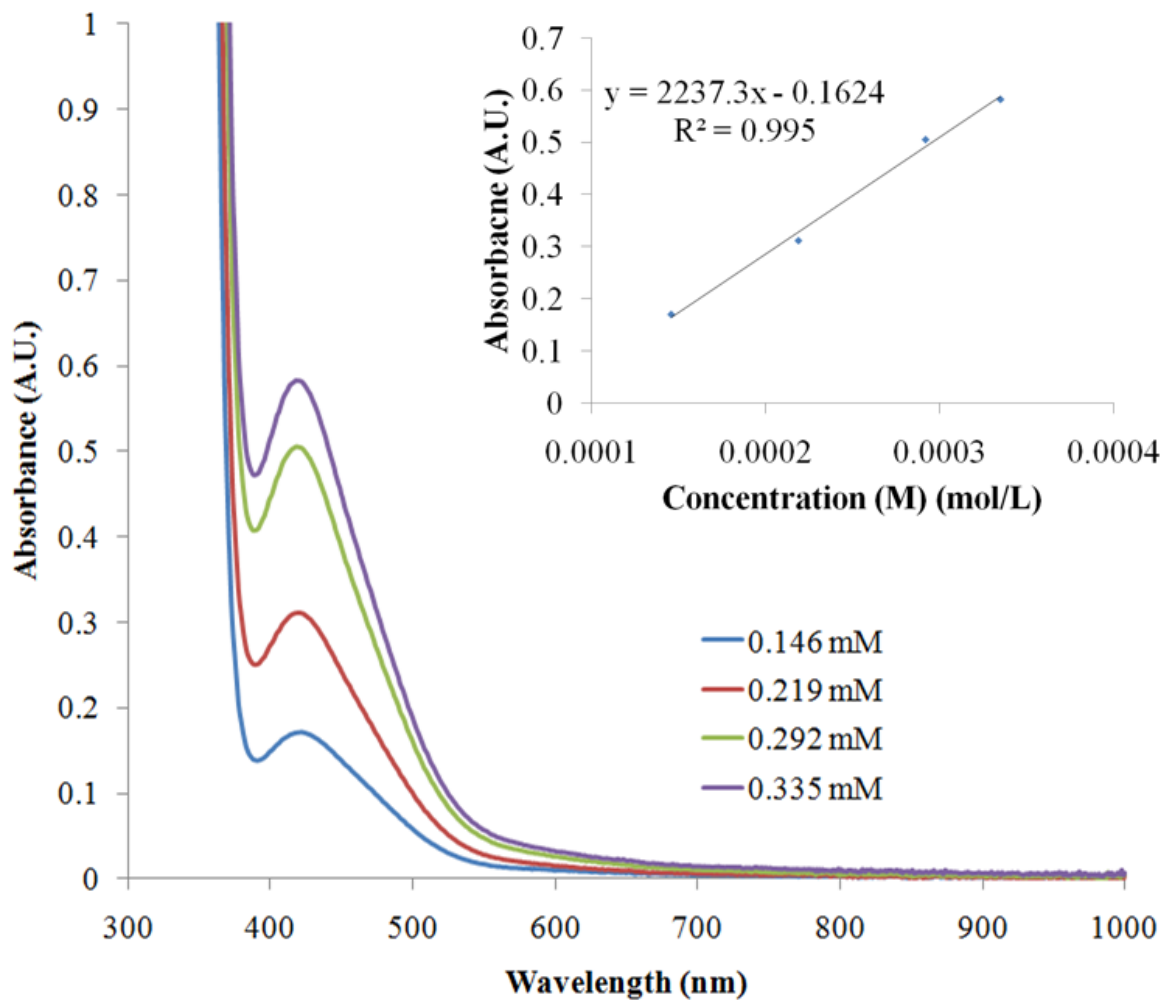

### SI 1.3 Crystallographic details for $[\text{Me}_2\text{NN}]\text{Cu}(\eta^2\text{-Ar}^{\text{F}}\text{N}=\text{NAr}^{\text{F}})$ (**3**)

Single crystals of  $\text{Ar}^{\text{F}}\text{N}=\text{NAr}^{\text{F}}$  and  $[\text{Me}_2\text{NN}]\text{Cu}(\eta^2\text{-Ar}^{\text{F}}\text{N}=\text{NAr}^{\text{F}})$  (**3**) were mounted under mineral or perfluoroalkyl ether oil on glass fibers in a cold nitrogen stream at 100(2) or 170(2) K on a Bruker SMART CCD system at Georgetown. Either full spheres (triclinic) or hemispheres (monoclinic or higher) of data were collected ( $0.3^\circ$  or  $0.5^\circ$   $\omega$ -scans;  $2\theta_{\text{max}} \geq 50^\circ$ ; monochromatic Mo K $\alpha$  radiation,  $\lambda = 0.7107 \text{ \AA}$ ) depending on the crystal system and integrated with the Bruker SAINT program. Structure solutions were performed using the SHELXTL/PC suite<sup>a</sup> and XSEED.<sup>b</sup> Intensities were corrected for Lorentz and polarization effects and an empirical absorption correction was applied using Blessing's method as incorporated into the program SADABS.<sup>c</sup> Non-hydrogen atoms were refined with anisotropic thermal parameters and hydrogen atoms were included in idealized positions.

#### References for X-ray structure refinement details

(a) SHELXTL-PC, Vers. 5.10; 1998, Bruker-Analytical X-ray Services, Madison, WI; G. M. Sheldrick, SHELX-97, Universität Göttingen, Göttingen, Germany.

(b) L. Barbour, XSEED, 1999.

(c) SADABS-2008/1; G. M. Sheldrick, 1996, based on the method described in R. H. Blessing, *Acta Crystallogr., Sect. A*, 1995, **51**, 33; SADABS 2.06, 2002, Bruker AXS, Madison, WI; U.S.A.

SI 1.4 Labeled thermal ellipsoid diagram of  $\text{Ar}^{\text{F}}\text{N}=\text{NAr}^{\text{F}}$ . Selected bond distances (Å) and angles (deg): N1-N2 1.250(3), N1-C1 1.425(4), N2-CC9 1.424(4), N2-N1-C1 113.8(2), N1-N2-C9 113.7(2).

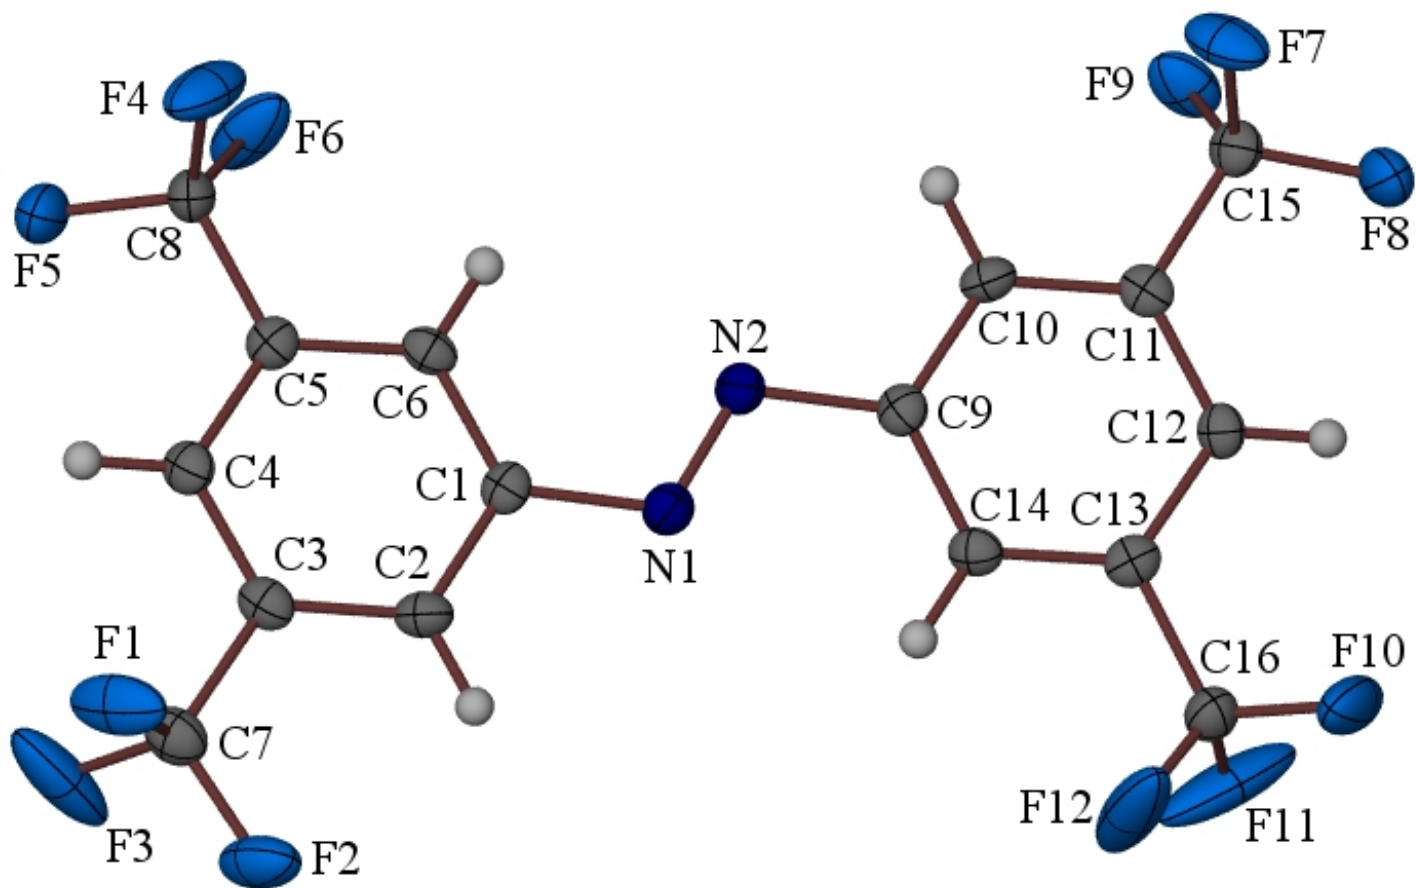

**SI 1.5 Labeled thermal ellipsoid diagram of  $[\text{Me}_2\text{NN}]\text{Cu}(\eta^2\text{-Ar}^{\text{F}}\text{N}=\text{NAr}^{\text{F}})$  (**3**) (all H atoms omitted).** Selected bond distances (Å) and angles (deg): Cu-N1 1.8940(17), Cu-N2 1.8939(18), Cu-N3 1.9430(17), Cu-N4 1.9438(17), N3-N4 1.352(2), N3-C22 1.430(3), N3-C30 1.435(3), N1-Cu-N2 99.19(8), N3-Cu-N4 40.72(7), N1-Cu-N3 110.94(7), N1-Cu-N4 151.41(7), N2-Cu-N3 149.63(7), N2-Cu-N4 109.37(7), N4-N3-C22 111.73(11), N3-N3-C30 111.59(17).

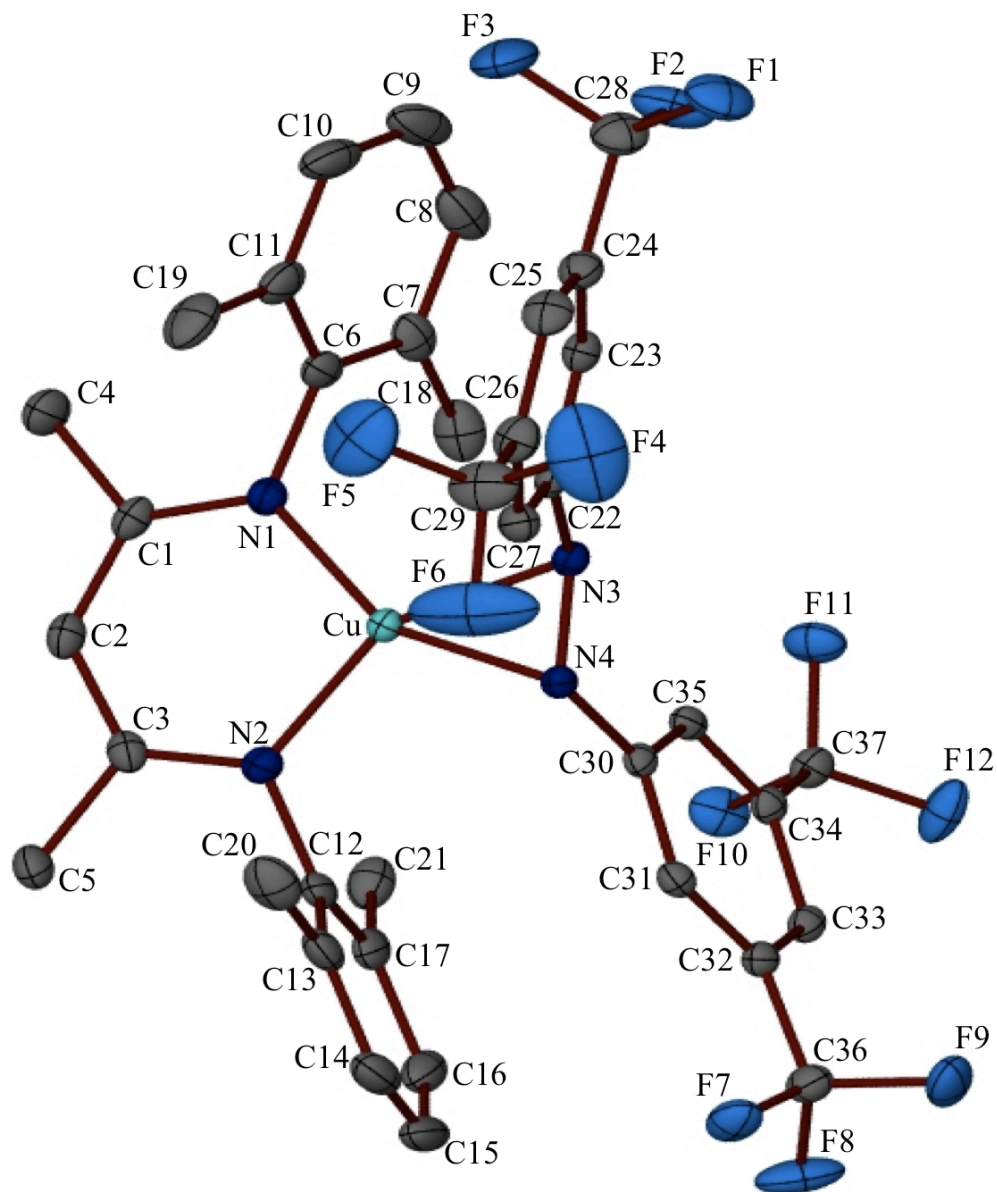

## SI 2. Experimental and calculated bond lengths for complexes 1-8.

|                      | Cu-L(1)    |                          | Cu-L(2)    |              | L(1)-L(2)            |       | Cu-N(1) <sub>eq</sub> |       | Cu-N(2) <sub>eq</sub> |       | Cu-N <sub>ax</sub> |       |
|----------------------|------------|--------------------------|------------|--------------|----------------------|-------|-----------------------|-------|-----------------------|-------|--------------------|-------|
|                      | Exp.       | Calc.                    | Exp.       | Calc.        | Exp.                 | Calc. | Exp.                  | Calc. | Exp.                  | Calc. | Exp.               | Calc. |
| <b>1<sup>a</sup></b> | 1.821(5)   | 1.851                    | 1.821(5)   | 1.850        | 1.392(12)            | 1.386 | 1.856(6)              | 1.889 | 1.856(6)              | 1.889 | –                  | –     |
| <b>2<sup>a</sup></b> | 1.851(3)   | 1.889 (O)                | 1.936(4)   | 1.985 (N)    | 1.333(4)             | 1.333 | 1.884(3)              | 1.910 | 1.886(3)              | 1.921 | –                  | –     |
| <b>3</b>             | 1.9430(17) | 2.004                    | 1.9438(17) | 2.003        | 1.352(2)             | 1.347 | 1.8940(17)            | 1.931 | 1.8939(18)            | 1.931 | –                  | –     |
| <b>4<sup>a</sup></b> | 1.975(5)   | 2.005 (CH <sub>2</sub> ) | 2.027(4)   | 2.080 (CHPh) | 1.373(6)             | 1.398 | 1.913(3)              | 1.943 | 1.915(3)              | 1.946 | –                  | –     |
| <b>5<sup>a</sup></b> | 1.957(2)   | 2.015 (ONPh)             | 1.949(2)   | 1.996 (ON)   | –                    | –     | 1.931(3)              | 1.963 | 1.929(3)              | 1.957 | –                  | –     |
| <b>6<sup>a</sup></b> | 1.84(1)    | 1.868                    | 1.84(1)    | 1.868        | 1.22(3) <sup>b</sup> | 1.361 | 1.99(2)               | 1.943 | 1.99(2)               | 1.943 | 2.25(2)            | 2.388 |
| <b>7<sup>a</sup></b> | 1.992(5)   | 2.006 (CH <sub>2</sub> ) | 2.022(5)   | 2.064 (CHPh) | 1.395(6)             | 1.397 | 1.958(3)              | 1.968 | 1.973(3)              | 1.976 | –                  | –     |
| <b>8</b>             | –          | 1.999 (C)                | –          | 2.031 (N)    | –                    | 1.339 | –                     | 1.949 | –                     | 1.937 | –                  | –     |
| <b>9</b>             | –          | 1.803                    | –          | 1.803        | –                    | 2.529 | –                     | 1.921 | –                     | 1.921 | –                  | –     |

<sup>a</sup> Experimental data were obtained from the literature for **1**,<sup>21</sup> **2**,<sup>4</sup> **3**,<sup>4</sup> **5**,<sup>4</sup> **6**,<sup>22</sup> and **7**.<sup>23</sup>

<sup>b</sup> Literature reports suggest that the crystallographic data for **6** underestimate the O–O bond length.<sup>24,25</sup>

## SI 3. DFT geometry optimization (BP86) and single-point (B3LYP) energies.

|                          | BP86 / E <sub>h</sub> | B3LYP <sup>a</sup> / E <sub>h</sub> | B3LYP <sup>b</sup> / E <sub>h</sub> |
|--------------------------|-----------------------|-------------------------------------|-------------------------------------|
| <b>1</b>                 | -2715.472644309       | -2714.437233263                     | <b>-2714.407301229</b>              |
| <b>1'</b>                | -2479.775120322       | -2478.906007112                     | –                                   |
| <b>2</b>                 | -2926.515174733       | -2925.339267732                     | <b>-2925.309100774</b>              |
| <b>2'</b>                | -2690.820071534       | -2689.808916759                     | –                                   |
| <b>3</b>                 | -4484.726122086       | –                                   | <b>-4482.845095174</b>              |
| <b>3'</b>                | -4249.033387676       | –                                   | <b>-4247.346918736</b>              |
| <b>4</b>                 | -2874.560888803       | –                                   | <b>-2873.378891028</b>              |
| <b>4'</b>                | -2638.868327134       | –                                   | –                                   |
| <b>5</b>                 | -3056.514729123       | –                                   | <b>-3055.246618293</b>              |
| <b>5'</b>                | -2820.820036190       | –                                   | –                                   |
| <b>6</b>                 | –                     | –                                   | <b>-3316.893921099</b>              |
| <b>6'</b>                | -2493.540883793       | –                                   | –                                   |
| <b>7<sup>+</sup></b>     | -2849.445594635       | –                                   | <b>-2525.836098772<sup>c</sup></b>  |
| <b>8</b>                 | -2890.607247358       | -2889.446512501                     | <b>-2889.416680166</b>              |
| <b>κ<sup>1</sup>-N-8</b> | -2890.607715709       | –                                   | –                                   |
| <b>9</b>                 | -2764.818009211       | -2763.785450238                     | <b>-2440.925715141</b>              |

<sup>a</sup> Calculations performed with the *def2-TZVP* basis set on copper.

<sup>b</sup> Calculations performed with the **CP(PPP)** basis set on copper.

<sup>c</sup> Calculation performed on the crystallographic coordinates of the cationic portion of the molecule.



**SI 4.1.** Representative fit to the experimental spectrum (top; experimental in black; components of the fit in blue and cyan; sum of the fit in red) and 2<sup>nd</sup> derivative of the experimental spectrum (bottom) for complex **1**. Experimental data obtained from reference 26.

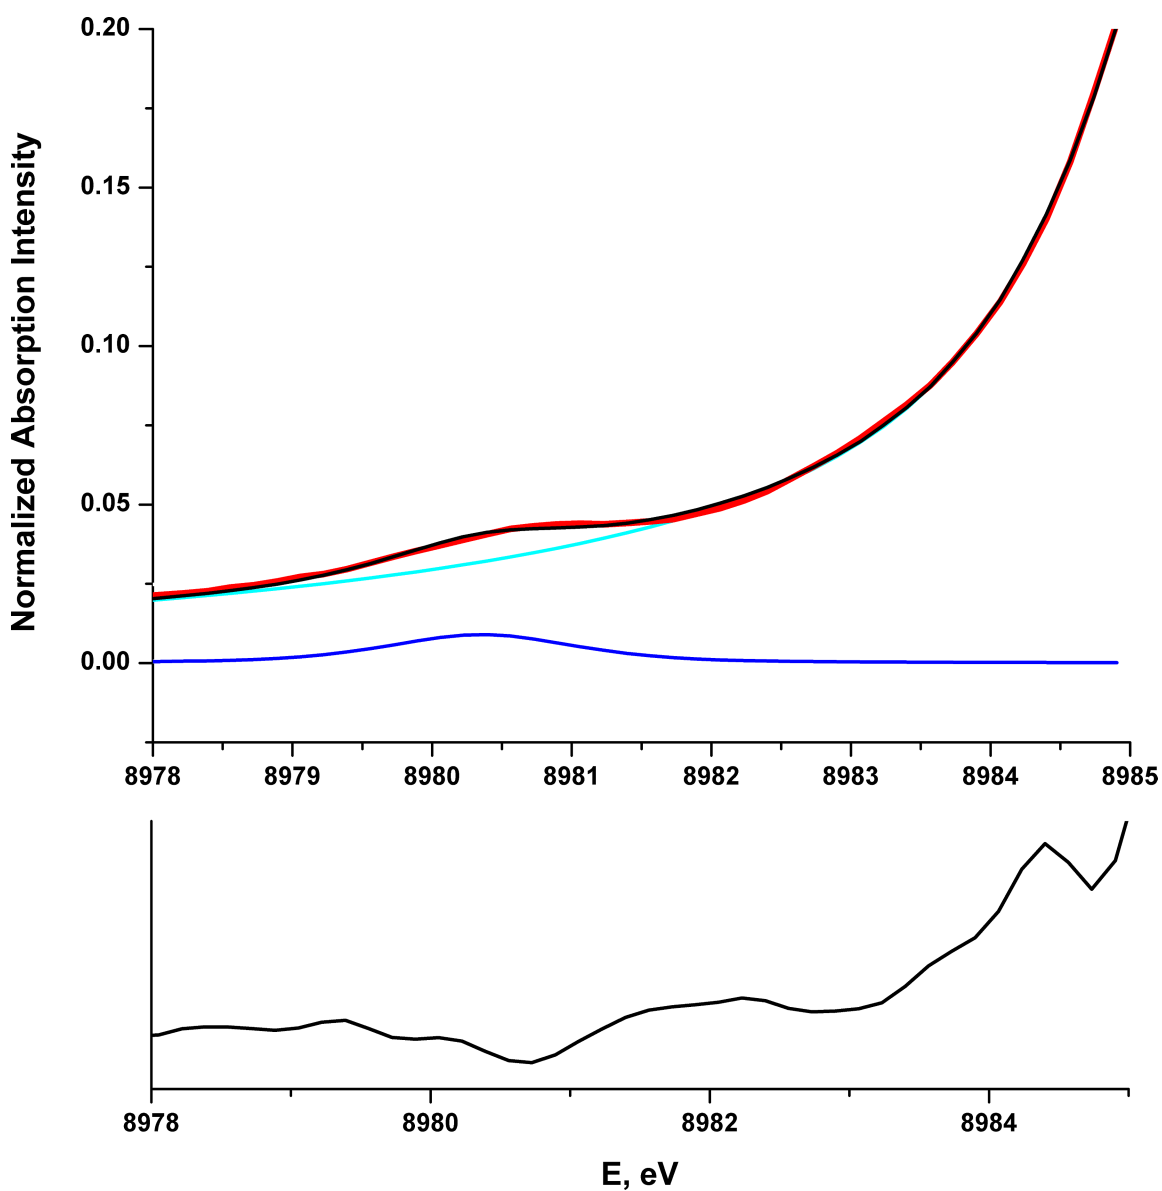

**SI 4.2.** Results of the fits to the initial pre-edge transition for **1**.

|                    | Fit range / eV | Peak position / eV | Hwhm / eV | Peak height / au | Peak area <sup>a</sup> | Scaled peak area <sup>b</sup> |
|--------------------|----------------|--------------------|-----------|------------------|------------------------|-------------------------------|
|                    | 8976-8983      | 8980.46            | 0.852     | 0.00966          | 0.017                  | 1.7                           |
|                    | 8976-8984      | 8980.44            | 0.850     | 0.00965          | 0.016                  | 1.6                           |
|                    | 8976-8985      | 8980.35            | 0.802     | 0.00903          | 0.015                  | 1.5                           |
| Average            |                | 8980.42            | 0.835     | 0.00944          | 0.016                  | 1.6                           |
| Standard deviation |                | 0.06               | 0.03      | 0.00036          | 0.0011                 | 0.11                          |

<sup>a</sup> Peak area determined by multiplying the full-width at half-height by the peak height.

<sup>b</sup> Scaled peak area is equal to the peak area multiplied by 100.

**SI 4.3.** Representative fit to the experimental spectrum (top; experimental in black; components of the fit in blue, green, and cyan; sum of the fit in red) and 2<sup>nd</sup> derivative of the experimental spectrum (bottom) for complex **2**.

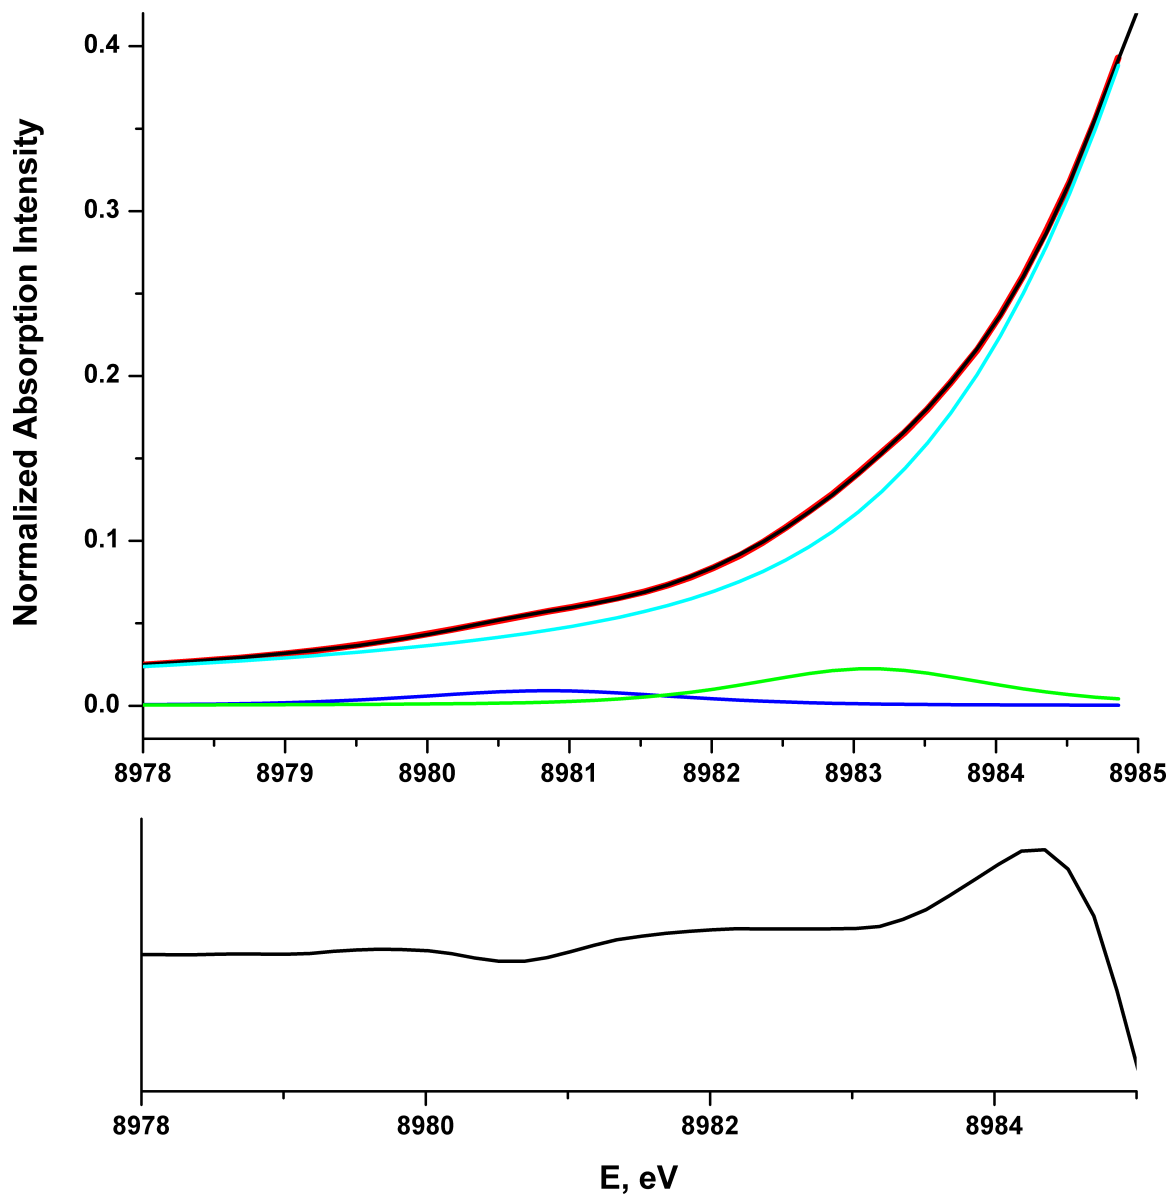

**SI 4.4.** Results of the fits to the initial pre-edge transition for **2**.

|                    | Fit range / eV | Peak position / eV | Hwhm / eV | Peak height / au | Peak area <sup>a</sup> | Scaled peak area <sup>b</sup> |
|--------------------|----------------|--------------------|-----------|------------------|------------------------|-------------------------------|
|                    | 8976-8983      | 8980.78            | 0.985     | 0.00888          | 0.018                  | 1.8                           |
|                    | 8976-8984      | 8980.85            | 1.07      | 0.00883          | 0.019                  | 1.9                           |
|                    | 8976-8985      | 8980.84            | 1.10      | 0.00916          | 0.020                  | 2.0                           |
| Average            |                | 8980.82            | 1.05      | 0.00896          | 0.019                  | 1.9                           |
| Standard deviation |                | 0.04               | 0.06      | 0.00018          | 0.0013                 | 0.13                          |

<sup>a</sup> Peak area determined by multiplying the full-width at half-height by the peak height.

<sup>b</sup> Scaled peak area is equal to the peak area multiplied by 100.

**SI 4.5.** Representative fit to the experimental spectrum (top; experimental in black; components of the fit in blue, green, and cyan; sum of the fit in red) and 2<sup>nd</sup> derivative of the experimental spectrum (bottom) for complex **3**.

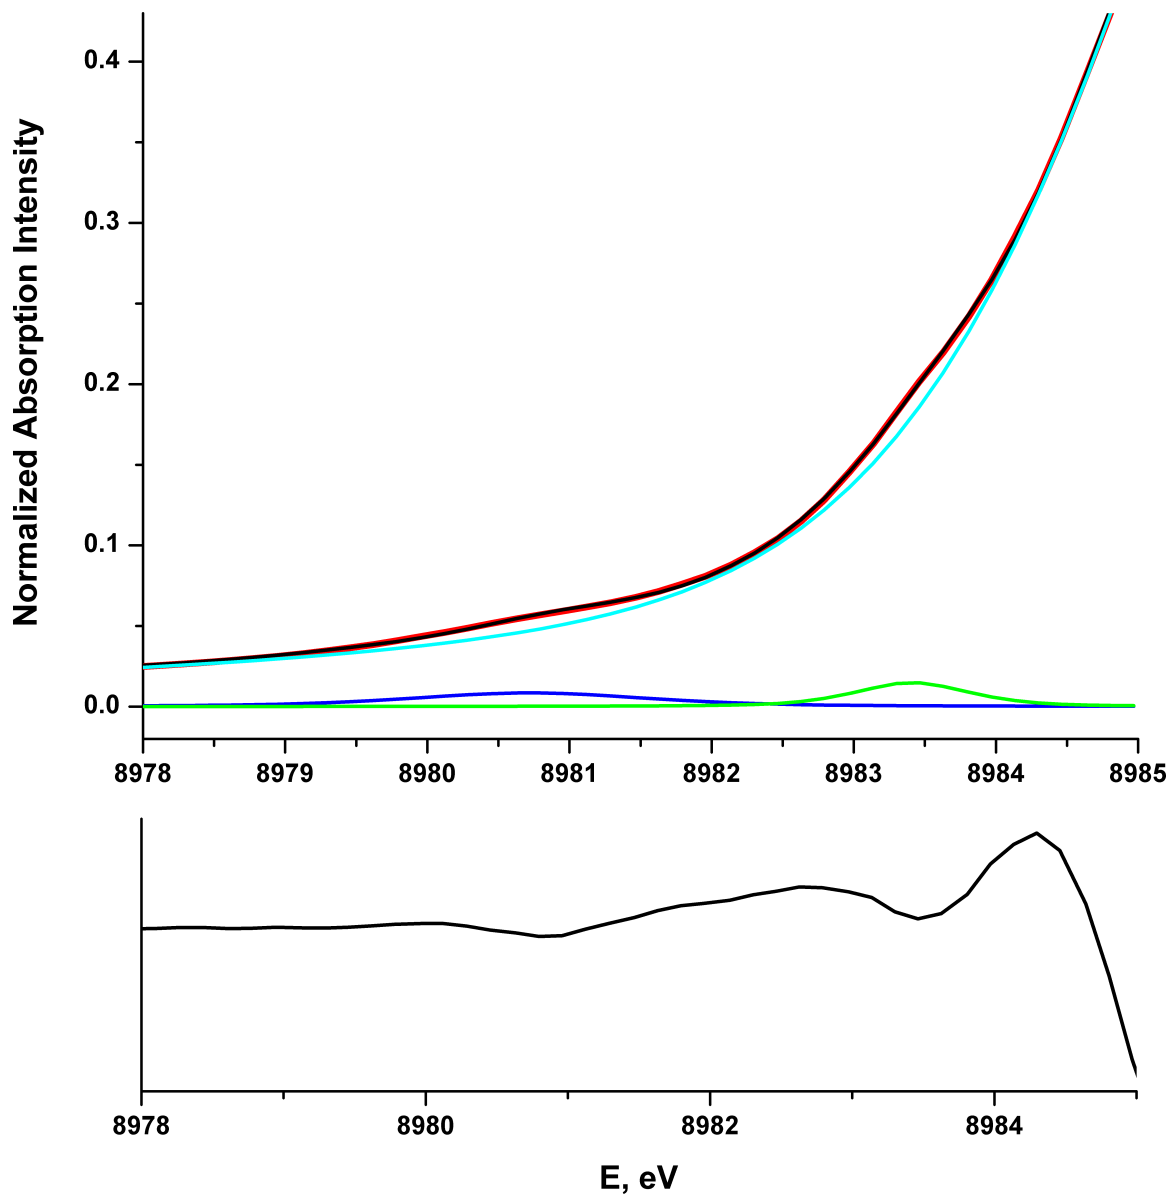

**SI 4.6.** Results of the fits to the initial pre-edge transition for **3**.

|                    | Fit range / eV | Peak position / eV | Hwhm / eV | Peak height / au | Peak area <sup>a</sup> | Scaled peak area <sup>b</sup> |
|--------------------|----------------|--------------------|-----------|------------------|------------------------|-------------------------------|
|                    | 8976-8983      | 8980.74            | 0.649     | 0.00625          | 0.0081                 | 0.81                          |
|                    | 8976-8984      | 8980.75            | 0.699     | 0.00722          | 0.010                  | 1.0                           |
|                    | 8976-8985      | 8980.72            | 0.999     | 0.00858          | 0.017                  | 1.7                           |
| Average            |                | 8980.74            | 0.782     | 0.00735          | 0.012                  | 1.2                           |
| Standard deviation |                | 0.02               | 0.189     | 0.00117          | 0.0047                 | 0.47                          |

<sup>a</sup> Peak area determined by multiplying the full-width at half-height by the peak height.

<sup>b</sup> Scaled peak area is equal to the peak area multiplied by 100.

**SI 4.7.** Representative fit to the experimental spectrum (top; experimental in black; components of the fit in blue, green, and cyan; sum of the fit in red) and 2<sup>nd</sup> derivative of the experimental spectrum (bottom) for complex **4**.

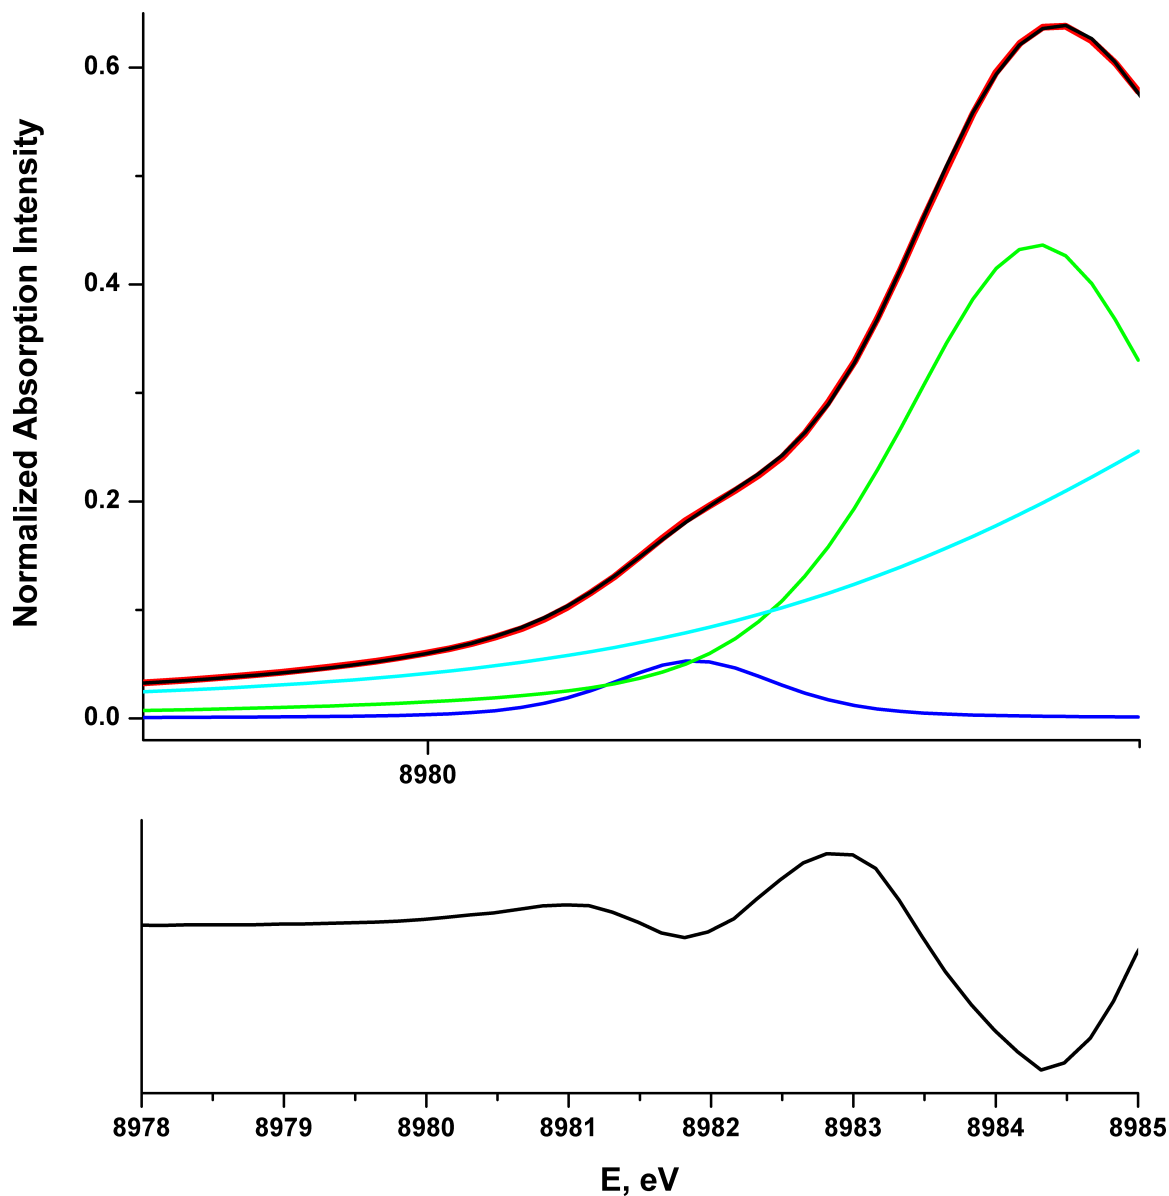

**SI 4.8.** Results of the fits to the initial pre-edge transition for **4**.

|                    | Fit range / eV | Peak position / eV | Hwhm / eV | Peak height / au | Peak area <sup>a</sup> | Scaled peak area <sup>b</sup> |
|--------------------|----------------|--------------------|-----------|------------------|------------------------|-------------------------------|
|                    | 8976-8983      | 8981.90            | 0.781     | 0.0566           | 0.088                  | 8.8                           |
|                    | 8976-8984      | 8981.87            | 0.711     | 0.0540           | 0.077                  | 7.7                           |
|                    | 8976-8985      | 8981.87            | 0.705     | 0.0532           | 0.075                  | 7.5                           |
| Average            |                | 8981.88            | 0.732     | 0.0546           | 0.080                  | 8.0                           |
| Standard deviation |                | 0.02               | 0.042     | 0.0018           | 0.0072                 | 0.72                          |

<sup>a</sup> Peak area determined by multiplying the full-width at half-height by the peak height.

<sup>b</sup> Scaled peak area is equal to the peak area multiplied by 100.

**SI 4.9.** Representative fit to the experimental spectrum (top; experimental in black; components of the fit in blue, green, pink, orange, and cyan; sum of the fit in red) and 2<sup>nd</sup> derivative of the experimental spectrum (bottom) for complex **5**. The features at 8980.8 and 8983.2 eV result from contamination by **2**, the direct synthetic precursor to **5**.

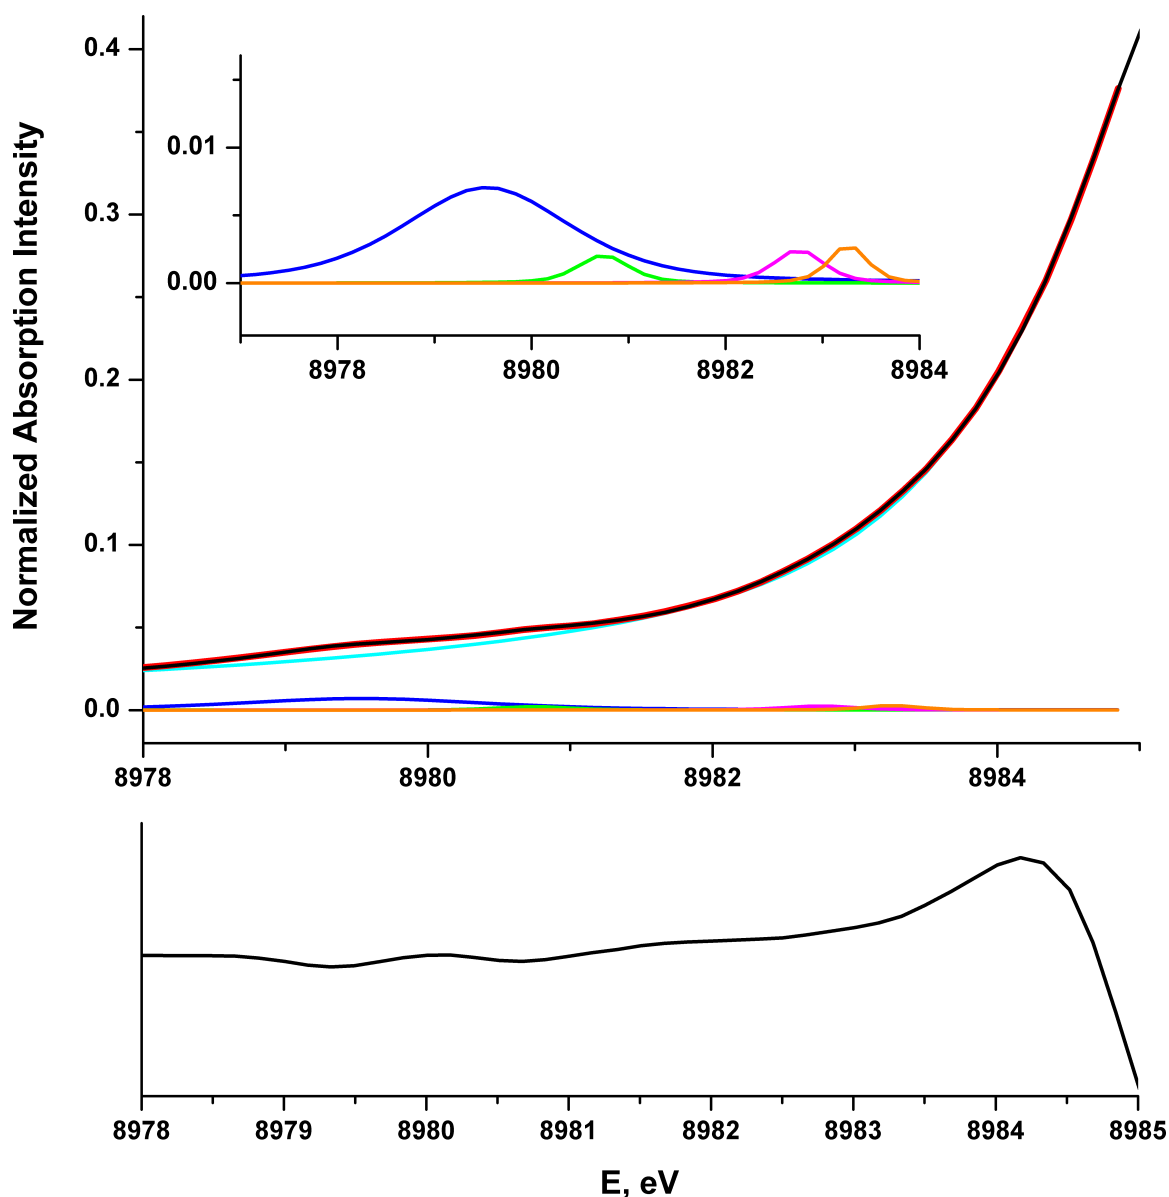

**SI 4.10.** Results of the fits to the initial pre-edge transition for **5**.

|                    | Fit range / eV | Peak position / eV | Hwhm / eV | Peak height / au | Peak area <sup>a</sup> | Scaled peak area <sup>b</sup> |
|--------------------|----------------|--------------------|-----------|------------------|------------------------|-------------------------------|
|                    | 8976-8983      | 8979.46            | 0.877     | 0.00732          | 0.013                  | 1.3                           |
|                    | 8976-8984      | 8979.46            | 0.896     | 0.00729          | 0.013                  | 1.3                           |
|                    | 8976-8985      | 8979.57            | 1.00      | 0.00664          | 0.013                  | 1.3                           |
| Average            |                | 8979.50            | 0.925     | 0.00708          | 0.013                  | 1.3                           |
| Standard deviation |                | 0.06               | 0.066     | 0.00038          | 0.0003                 | 0.03                          |

<sup>a</sup> Peak area determined by multiplying the full-width at half-height by the peak height.

<sup>b</sup> Scaled peak area is equal to the peak area multiplied by 100.

**SI 5.1.** Experimental Cu K-edge XAS spectrum of **4** (black) and calculated Cu K-edge XAS spectrum of **7<sup>+</sup>** (red) with individual calculated transition energies (vertical bars). TD-DFT calculations on **7<sup>+</sup>** were performed as described in the Experimental section, using the crystallographically determined molecular coordinates of the cation. The vertical black and red sticks above the solid traces illustrate the experimental (**4**) and calculated (**7<sup>+</sup>**) initial pre-edge transition energies.

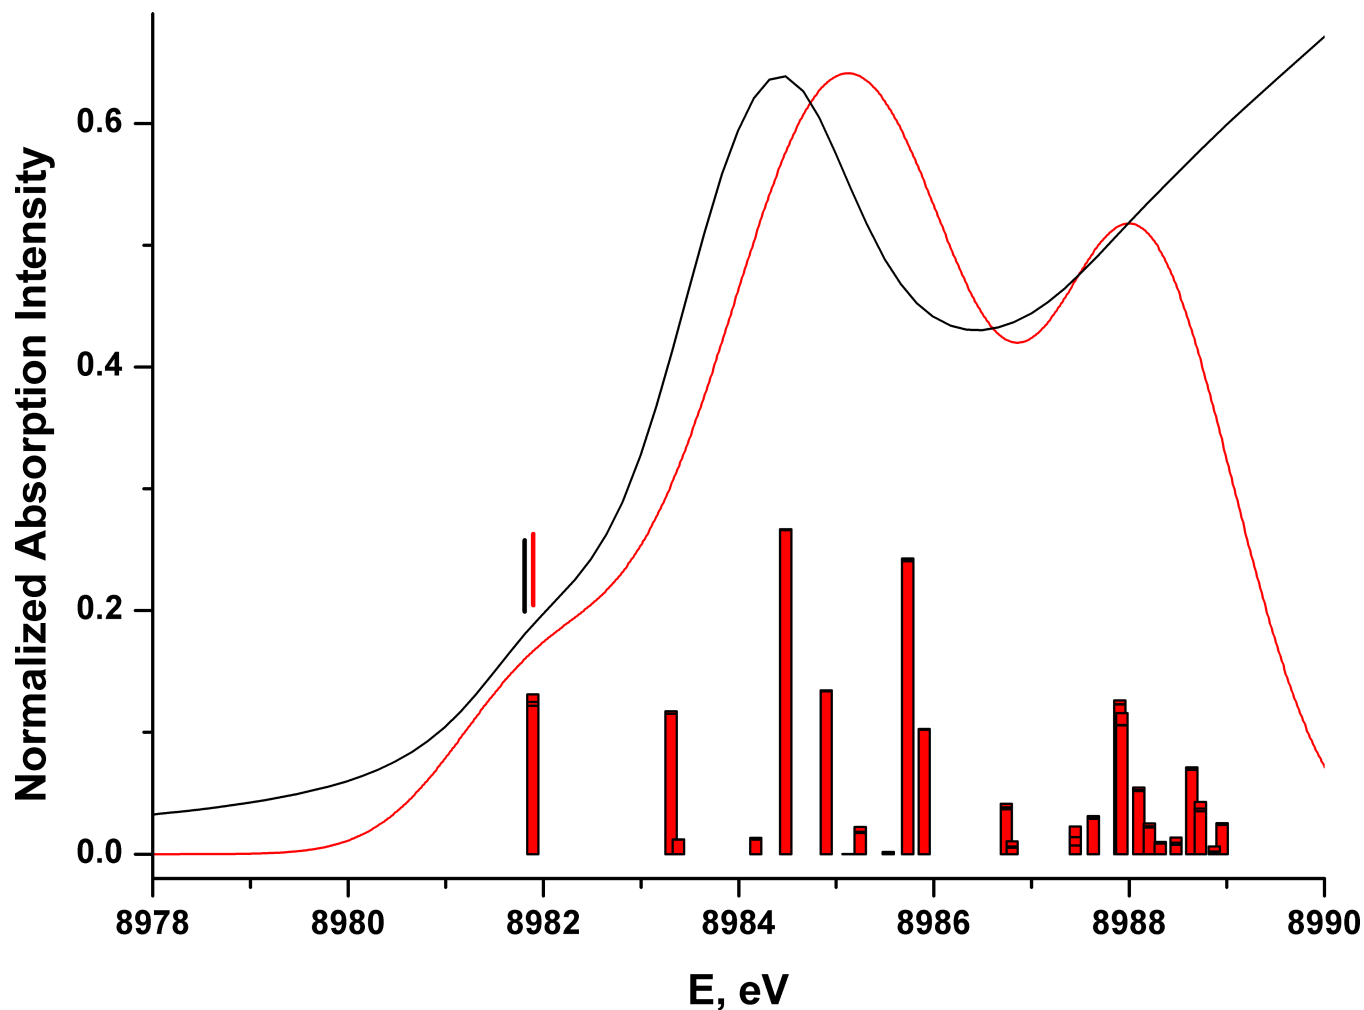

**SI 5.2.** The calculated transition at 8981.9 eV enters a state comprised of 23.8 % <LUMO> and 70.7 % <LUMO+2>.

<LUMO>

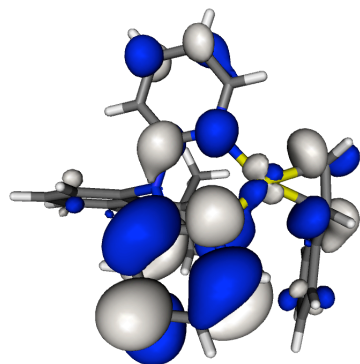

<LUMO+2>

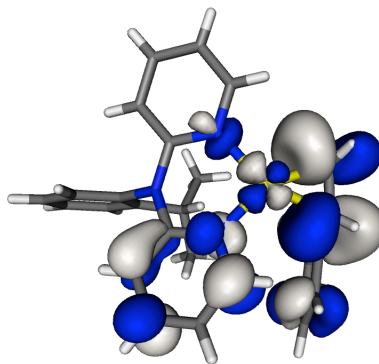

SI 6. Comparison of experimental (black) and calculated (red) Cu K-edge XANES data for **6**. The experimental data were obtained from the literature.<sup>26</sup>

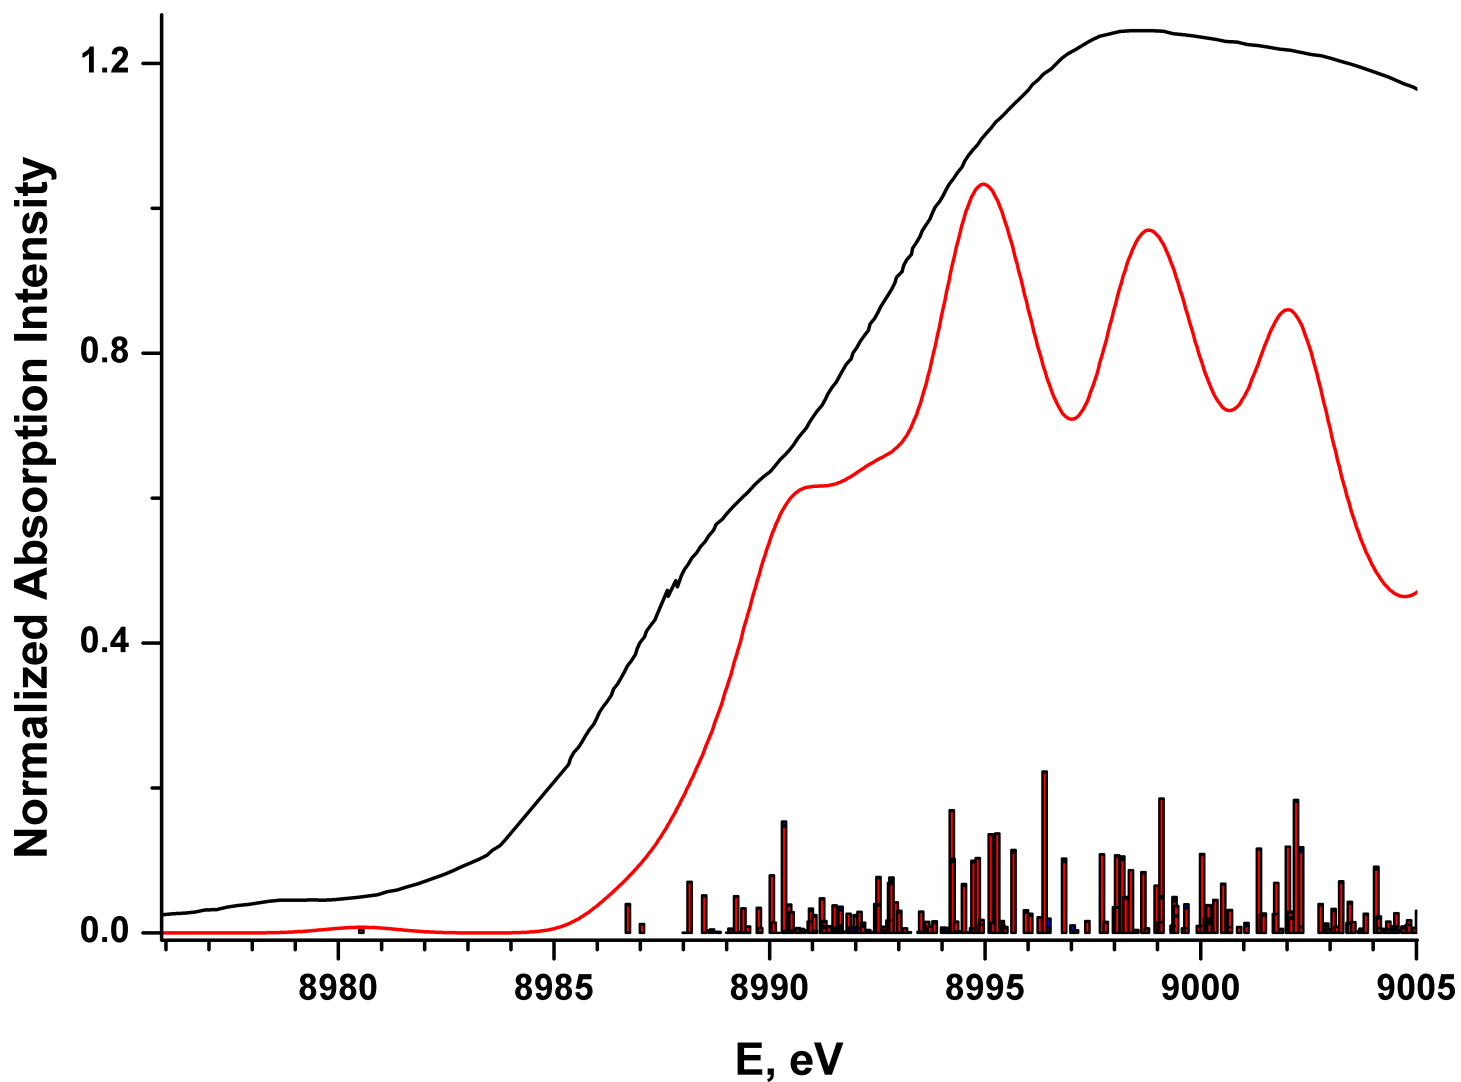

SI 7.1. Calculated Cu K-edge XANES spectrum for [Me<sub>2</sub>NN]CuF<sub>2</sub>.

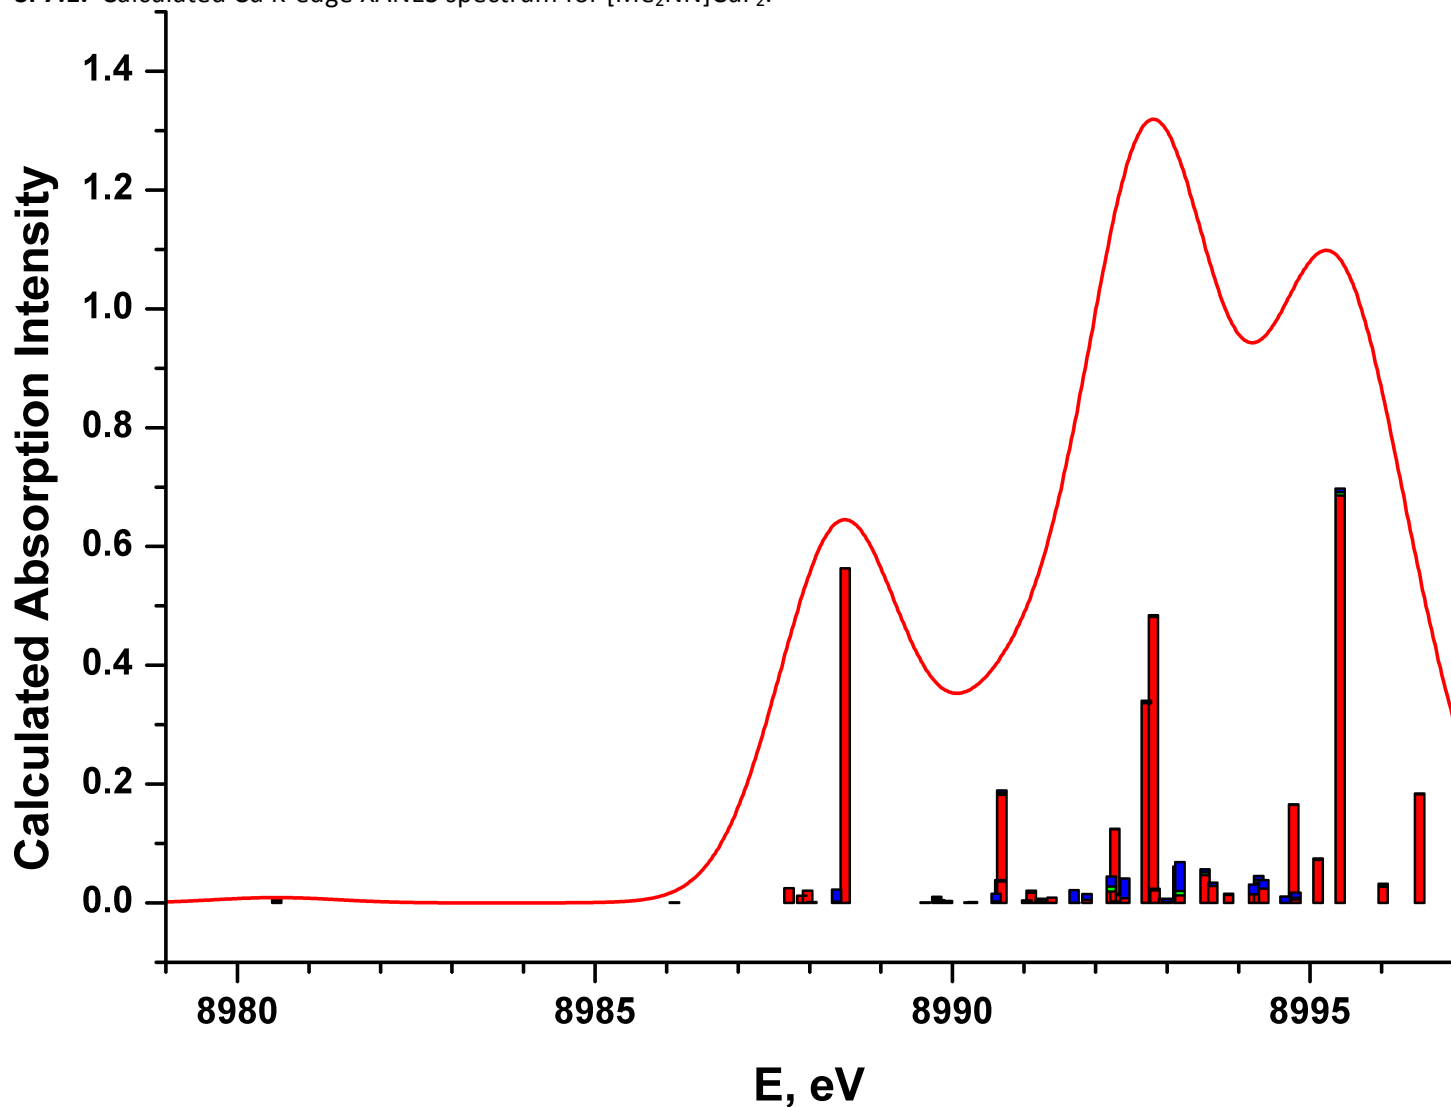

SI 7.2. The calculated transitions at 8980.2 eV enters a state comprised of 99% <LUMO>.

<LUMO>

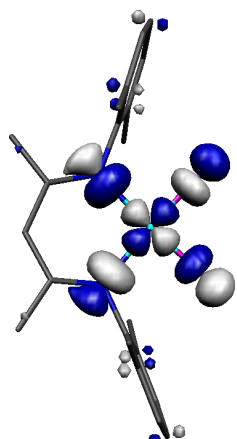

| Fragment             | % in LUMO |
|----------------------|-----------|
| Cu-d <sub>xz</sub>   | 40.4      |
| F                    | 21.7      |
| [Me <sub>2</sub> NN] | 18.7      |

| Fragment             | % in LUMO+7 |
|----------------------|-------------|
| Cu-4p <sub>y</sub>   | 39.8        |
| F                    | 3.6         |
| [Me <sub>2</sub> NN] | 54.1        |

<LUMO+7>

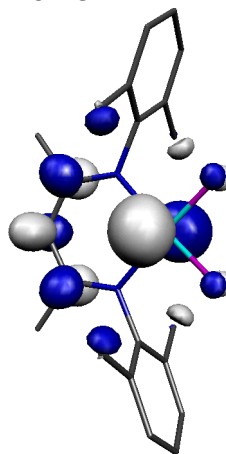



**SI 8.1.** Results from a relaxed coordinate scan of the Cu–N<sub>eq</sub> distance in TpCu(O<sub>2</sub>), plotted against the calculated initial Cu pre-K-edge transition energy for each optimized geometry. The Cu–N<sub>eq</sub> distance (blue diamonds) was constrained to values of 1.85, 1.90, 1.95, 2.00, and 2.05 Å as the geometry of the molecule was optimized (BP86, see experimental section). The resulting Cu–N<sub>ax</sub> (red squares), Cu–O (green triangles), and O–O (grey crosses) distances are plotted, along with the associated linear fit to each data series.

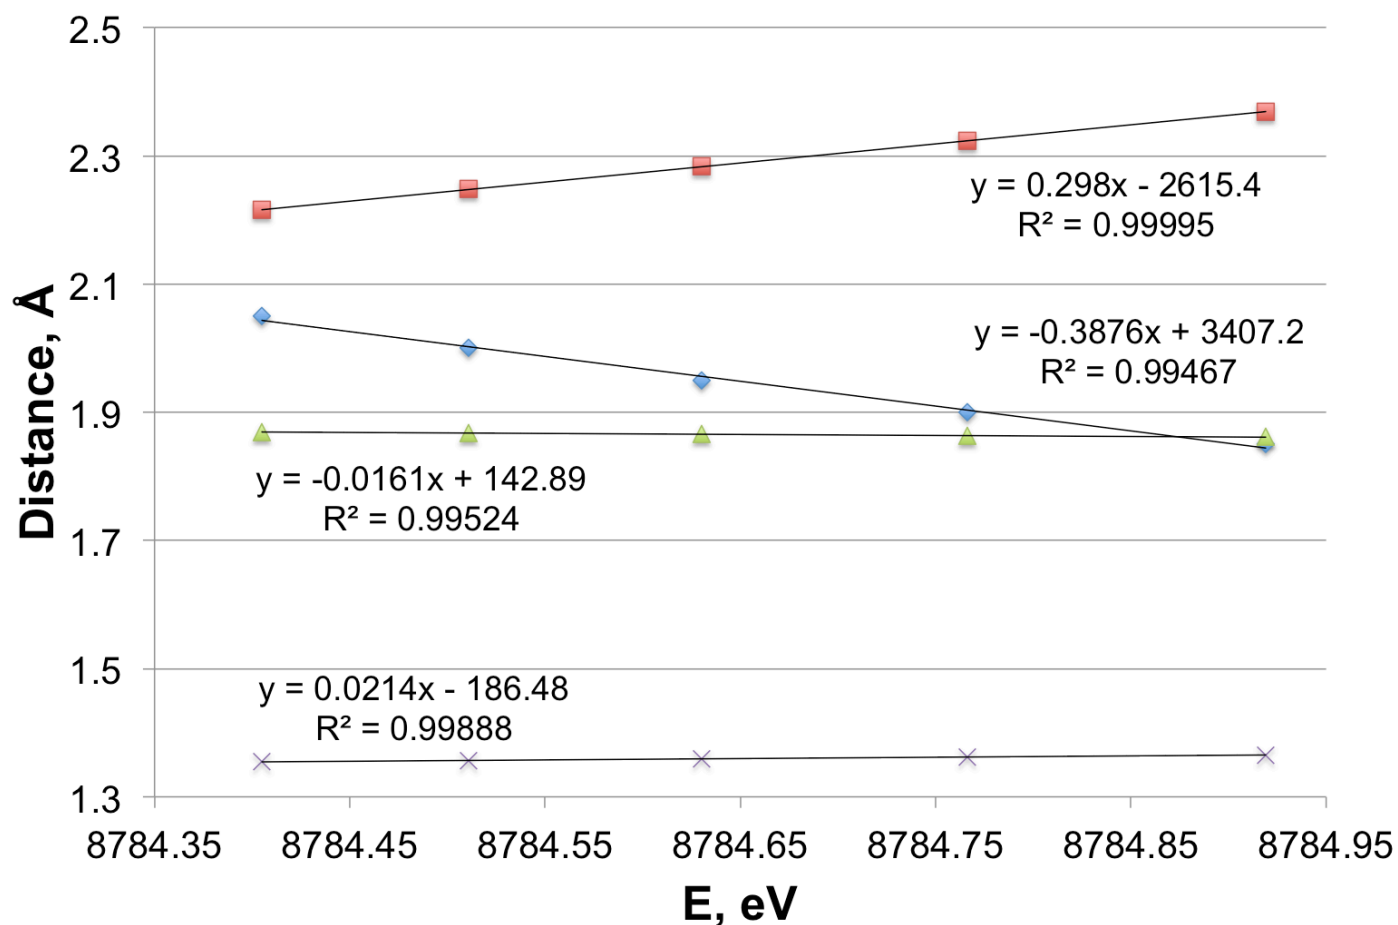

**SI 8.2.** Tabulated results from the relaxed coordinate scan of the Cu–N<sub>eq</sub> bonds and subsequent calculation of the initial Cu pre-K-edge transition energy.

| Cu–N <sub>eq</sub> / Å | Cu–N <sub>ax</sub> / Å | Cu–O / Å | O–O / Å | LUMO              |                    | Pre-edge / eV |
|------------------------|------------------------|----------|---------|-------------------|--------------------|---------------|
|                        |                        |          |         | % d <sub>xz</sub> | % O–p <sub>z</sub> |               |
| 1.8500                 | 2.3689                 | 1.8614   | 1.3654  | 31.0              | 46.8               | 8784.919      |
| 1.9000                 | 2.3236                 | 1.8635   | 1.3624  | 30.9              | 47.6               | 8784.766      |
| 1.9500                 | 2.2836                 | 1.8656   | 1.3595  | 30.6              | 48.4               | 8784.630      |
| 2.0000                 | 2.2479                 | 1.8676   | 1.3569  | 30.3              | 48.8               | 8784.511      |
| 2.0500                 | 2.2155                 | 1.8697   | 1.3544  | 29.8              | 49.0               | 8784.405      |

## SI 9. Comparison of DFT and multiconfiguration ab initio methods.

Analysis of the ground state electronic structures of complexes **1-4** and **6** highlight the difficulty in evaluating multi-determinant systems with ligand field and density functional theories. The broken symmetry (BS) methodology originally developed by Noodleman *et al.*<sup>27,28</sup> has traditionally performed well at modeling the multi-determinantal nature of a range of complexes with DFT, but the  $S = 0$  species **1-4** failed to yield BS solutions, despite presenting clear multi-determinant ground states by *ab initio* methods.

Related studies have addressed the limitations of most single-determinate methods when describing multi-determinate states, but the popularity of the BS methodology begs a comment on why this methodology failed for most of the complexes studied herein. The BS methodology as applied to multi-determinant singlets often relies on two common factors: *i*) a close energetic proximity between the ground state and the lowest energy  $^1A_1$  excited state and *ii*) the representation of these two states by the determinants  $^1\Phi_0 = |(\phi_A + \phi_B)^2(\phi_A - \phi_B)^0\rangle$  and  $^1\Phi_3 = |(\phi_A + \phi_B)^0(\phi_A - \phi_B)^2\rangle$ , where  $\phi_{A(B)}$  refers to a fragment orbital originating from A(B). In a simplified sense, the BS methodology uses the lowest energy triplet state to generate an approximation of the orbital character of  $^1\Phi_3$ . Thus, if the singlet and triplet states derived by DFT are comprised of orbitals that do not represent bonding and anti-bonding combinations of  $\phi_A$  and  $\phi_B$  (or, more generally, do not have the appropriate symmetry to mix), the BS methodology will not be able to generate the localized orbitals needed for separate representation of the  $\alpha$ - and  $\beta$ -electrons in the single determinant available within DFT. Using **1** as an example,  $^1\Phi_0$  is of  $A_1$  symmetry and can be described as  $(1b_2)^2(1a_2)^2(2b_2)^0$ , but DFT and *ab initio* computation methods both predict  $^3\Phi_0$  for this species to be  $(1b_2)^2(1a_2)^1(2b_2)^1$ , a  $B_1$  configuration, not the  $A_1$ -symmetric  $(1b_2)^1(1a_2)^2(2b_2)^1$  as would be required for mixing with  $^1\Phi_0$ . Thus, the BS methodology fails in these cases because the lowest energy triplet state is of a different character than the  $A_1$  ground state.

## SI 10. Broken symmetry (1,1) B3LYP/def2-TZVP, def2-TZV/J (Cu,N,O)/def2-SV(P), def2-SV/J single point energy calculation on **1'**.

Final single-point energy:  $-2478.898086161746 E_h$  (+5.0 kcal/mol vs. RKS solution)

$J = 1218.93 \text{ cm}^{-1}$  (from  $J = -(E_{HS} - E_{BS}) / (\langle S^2 \rangle_{HS} - \langle S^2 \rangle_{BS})$ )<sup>29,30</sup>

$S_{\alpha\beta}(\text{HOMO})$ : 0.005

<HOMO- $\alpha$ >

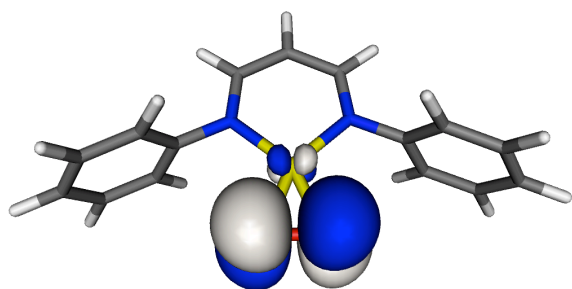

<HOMO- $\beta$ >

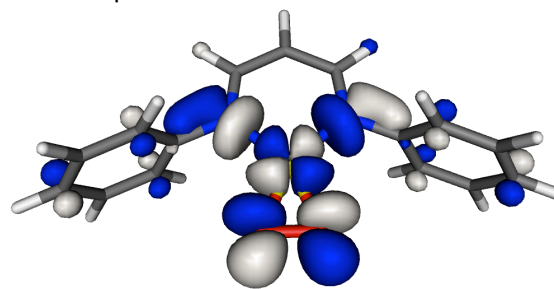

**SI 11.1.** CASSCF computational results: CAS(2,2)  $S = 0$  ( $v = 0$ )

**1'**:  $E = -2472.6940598883 E_h$

| Configuration no. | Configuration weight | Representative electron configurations |                      |
|-------------------|----------------------|----------------------------------------|----------------------|
|                   |                      | <80>                                   | <81>                 |
| 1                 | 0.82084              | $\uparrow\downarrow$                   |                      |
| 2                 | 0.17916              |                                        | $\uparrow\downarrow$ |

| Orbital no. | Graphical representation                                                          | Orbital description                   | Occupation |
|-------------|-----------------------------------------------------------------------------------|---------------------------------------|------------|
| 80          | 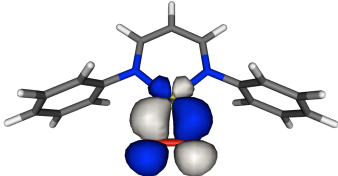 | $\langle d_{xz} + \pi^*_{ip} \rangle$ | 1.641683   |
| 81          |  | $\langle d_{xz} - \pi^*_{ip} \rangle$ | 0.358317   |

**2'**:  $E = -2682.2671563581 E_h$

| Configuration no. | Configuration weight | Representative electron configurations |                      |
|-------------------|----------------------|----------------------------------------|----------------------|
|                   |                      | <100>                                  | <101>                |
| 1                 | 0.79840              | $\uparrow\downarrow$                   |                      |
| 2                 | 0.20160              |                                        | $\uparrow\downarrow$ |

| Orbital no. | Graphical representation                                                            | Orbital description                   | Occupation |
|-------------|-------------------------------------------------------------------------------------|---------------------------------------|------------|
| 100         | 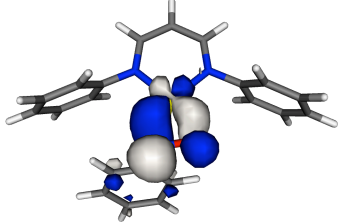 | $\langle d_{xz} + \pi^*_{ip} \rangle$ | 1.596793   |
| 101         |  | $\langle d_{xz} - \pi^*_{ip} \rangle$ | 0.403207   |

3': E = -4233.1912361990 E<sub>h</sub>

| Configuration no. | Configuration weight | Representative electron configurations |       |
|-------------------|----------------------|----------------------------------------|-------|
|                   |                      | <184>                                  | <185> |
| 1                 | 0.82694              | ↑↓                                     |       |
| 2                 | 0.17306              |                                        | ↑↓    |

| Orbital no. | Graphical representation                                                           | Orbital description                   | Occupation |
|-------------|------------------------------------------------------------------------------------|---------------------------------------|------------|
| 184         | 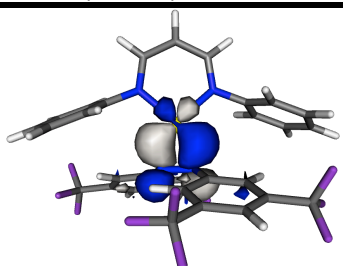  | $\langle d_{xz} + \pi^*_{ip} \rangle$ | 1.653871   |
| 185         |  | $\langle d_{xz} - \pi^*_{ip} \rangle$ | 0.346129   |

4': E = -2630.4389283856 E<sub>h</sub>

| Configuration no. | Configuration weight | Representative electron configurations |       |
|-------------------|----------------------|----------------------------------------|-------|
|                   |                      | <100>                                  | <101> |
| 1                 | 0.91824              | ↑↓                                     |       |
| 2                 | 0.08176              |                                        | ↑↓    |

| Orbital no. | Graphical representation                                                            | Orbital description                   | Occupation |
|-------------|-------------------------------------------------------------------------------------|---------------------------------------|------------|
| 100         | 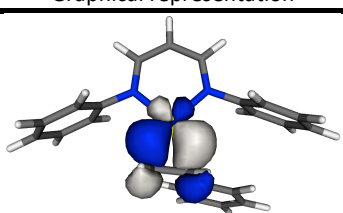 | $\langle d_{xz} + \pi^*_{ip} \rangle$ | 1.836478   |
| 101         |  | $\langle d_{xz} - \pi^*_{ip} \rangle$ | 0.163522   |

5', CAS(5,5): E = -2811.6389037615 E<sub>h</sub>

| Configuration no. | Configuration weight | Representative electron configurations |       |       |       |       |
|-------------------|----------------------|----------------------------------------|-------|-------|-------|-------|
|                   |                      | <106>                                  | <107> | <108> | <109> | <110> |
| 1                 | 0.92413              | ↑↓                                     | ↑↓    | ↑     |       |       |
| 2                 | 0.05169              | ↑↓                                     |       | ↑     | ↑↓    |       |
| 3                 | 0.02283              |                                        | ↑↓    | ↑     |       | ↑↓    |

| Orbital no. | Graphical representation                                                            | Orbital description                | Occupation |
|-------------|-------------------------------------------------------------------------------------|------------------------------------|------------|
| 106         | 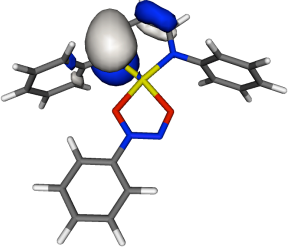   | [Me2NN]-π                          | 1.951719   |
| 107         |   | PhN <sub>2</sub> O <sub>2</sub> -π | 1.894016   |
| 108         |  | d <sub>xz</sub>                    | 0.999999   |
| 109         |  | PhN <sub>2</sub> O <sub>2</sub> -π | 0.105966   |
| 110         |  | [Me2NN]-π                          | 0.048300   |

6': E = -2486.5112633846 E<sub>h</sub>

| Configuration no. | Configuration weight | Representative electron configurations |      |
|-------------------|----------------------|----------------------------------------|------|
|                   |                      | <77>                                   | <78> |
| 1                 | 0.80364              | ↑↓                                     |      |
| 2                 | 0.19636              |                                        | ↑↓   |

| Orbital no. | Graphical representation                                                           | Orbital description                   | Occupation |
|-------------|------------------------------------------------------------------------------------|---------------------------------------|------------|
| 77          | 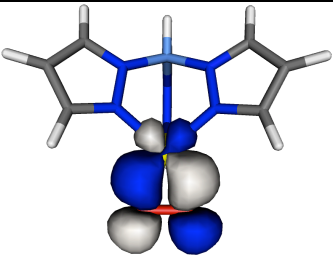  | $\langle d_{xz} + \pi^*_{ip} \rangle$ | 1.607272   |
| 78          |  | $\langle d_{xz} - \pi^*_{ip} \rangle$ | 0.392728   |

8: E = -2880.4591088750 E<sub>h</sub>

| Configuration no. | Configuration weight | Representative electron configurations |       |
|-------------------|----------------------|----------------------------------------|-------|
|                   |                      | <124>                                  | <125> |
| 1                 | 0.88347              | ↑↓                                     |       |
| 2                 | 0.11653              |                                        | ↑↓    |

| Orbital no. | Graphical representation                                                            | Orbital description                   | Occupation |
|-------------|-------------------------------------------------------------------------------------|---------------------------------------|------------|
| 124         | 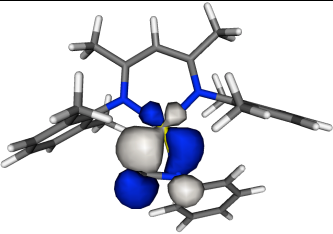 | $\langle d_{xz} + \pi^*_{ip} \rangle$ | 1.766937   |
| 125         |  | $\langle d_{xz} - \pi^*_{ip} \rangle$ | 0.233063   |

**SI 11.2.** CASSCF computational results: SA-CAS(4,3)  $S = 0$  ( $v = 0$ ) and  $S = 0$  ( $v' = 0$ )

1': Root 0:  $E = -2472.6904501526 E_h$

Root 1:  $E = -2472.6690752761 E_h$

SA-CASSCF transition energy:

| STATE | ROOT | MULT | $\Delta E/cm^{-1}$ |
|-------|------|------|--------------------|
| 0:    | 0    | 1    | 0.0                |
| 0:    | 1    | 1    | 4691.2             |

| Root no. | Configuration no. | Configuration weight | Representative electron configurations |                               |                                       | Orbital description |
|----------|-------------------|----------------------|----------------------------------------|-------------------------------|---------------------------------------|---------------------|
|          |                   |                      | <79>                                   | <80>                          | <81>                                  |                     |
| 0        | 1                 | 0.65632              | $\uparrow\downarrow$                   | $\uparrow\downarrow$          |                                       |                     |
| 0        | 2                 | 0.22490              | $\uparrow$                             | $\uparrow\downarrow$          | $\downarrow$                          |                     |
| 0        | 3                 | 0.11867              |                                        | $\uparrow\downarrow$          | $\uparrow\downarrow$                  |                     |
| 1        | 1                 | 0.89047              | $\uparrow\downarrow$                   | $\uparrow$                    | $\downarrow$                          |                     |
| 1        | 2                 | 0.10953              | $\uparrow$                             | $\downarrow$                  | $\uparrow\downarrow$                  |                     |
|          |                   |                      | $\langle d_{xz} + \pi^*_{ip} \rangle$  | $\langle \pi^*_{oop} \rangle$ | $\langle d_{xz} - \pi^*_{ip} \rangle$ | Orbital description |
|          |                   |                      | 1.714121                               | 1.499887                      | 0.785992                              | Occupation          |

2': Root 0:  $E = -2682.2581645616 E_h$

Root 1:  $E = -2682.1811487183 E_h$

SA-CASSCF transition energy:

| STATE | ROOT | MULT | $\Delta E/cm^{-1}$ |
|-------|------|------|--------------------|
| 0:    | 0    | 1    | 0.0                |
| 0:    | 1    | 1    | 16903.0            |

| Root no. | Configuration no. | Configuration weight | Representative electron configurations |                               |                                       | Orbital description |
|----------|-------------------|----------------------|----------------------------------------|-------------------------------|---------------------------------------|---------------------|
|          |                   |                      | <99>                                   | <100>                         | <101>                                 |                     |
| 0        | 1                 | 0.58210              | $\uparrow\downarrow$                   | $\uparrow\downarrow$          |                                       |                     |
| 0        | 2                 | 0.21597              | $\uparrow$                             | $\uparrow\downarrow$          | $\downarrow$                          |                     |
| 0        | 3                 | 0.10746              |                                        | $\uparrow\downarrow$          | $\uparrow\downarrow$                  |                     |
| 0        | 4                 | 0.08374              | $\uparrow\downarrow$                   | $\uparrow$                    | $\downarrow$                          |                     |
| 0        | 5                 | 0.01064              | $\uparrow$                             | $\downarrow$                  | $\uparrow\downarrow$                  |                     |
| 1        | 1                 | 0.80437              | $\uparrow\downarrow$                   | $\uparrow$                    | $\downarrow$                          |                     |
| 1        | 2                 | 0.10124              | $\uparrow$                             | $\downarrow$                  | $\uparrow\downarrow$                  |                     |
| 1        | 3                 | 0.06056              | $\uparrow\downarrow$                   | $\uparrow\downarrow$          |                                       |                     |
| 1        | 4                 | 0.02226              | $\uparrow$                             | $\uparrow\downarrow$          | $\downarrow$                          |                     |
| 1        | 5                 | 0.01156              |                                        | $\uparrow\downarrow$          | $\uparrow\downarrow$                  |                     |
|          |                   |                      | $\langle d_{xz} + \pi^*_{ip} \rangle$  | $\langle \pi^*_{oop} \rangle$ | $\langle d_{xz} - \pi^*_{ip} \rangle$ | Orbital description |
|          |                   |                      | 1.705927                               | 1.499899                      | 0.794174                              | Occupation          |

3': Root 0:  $E = -4233.1860699016 E_h$

Root 1:  $E = -4233.0797448536 E_h$

SA-CASSCF transition energy:

| STATE | ROOT | MULT | $\Delta E/cm^{-1}$ |
|-------|------|------|--------------------|
| 0:    | 0    | 1    | 0.0                |
| 0:    | 1    | 1    | 23335.7            |

| Root no. | Configuration no. | Configuration weight | Representative electron configurations |                               |                                       | Orbital description |
|----------|-------------------|----------------------|----------------------------------------|-------------------------------|---------------------------------------|---------------------|
|          |                   |                      | <183>                                  | <184>                         | <185>                                 |                     |
| 0        | 1                 | 0.64011              | $\uparrow\downarrow$                   | $\uparrow\downarrow$          |                                       |                     |
| 0        | 2                 | 0.24263              | $\uparrow$                             | $\uparrow\downarrow$          | $\downarrow$                          |                     |
| 0        | 3                 | 0.11713              |                                        | $\uparrow\downarrow$          | $\uparrow\downarrow$                  |                     |
| 1        | 1                 | 0.88501              | $\uparrow\downarrow$                   | $\uparrow$                    | $\downarrow$                          |                     |
| 1        | 2                 | 0.11493              | $\uparrow$                             | $\downarrow$                  | $\uparrow\downarrow$                  |                     |
|          |                   |                      | $\langle d_{xz} + \pi^*_{ip} \rangle$  | $\langle \pi^*_{oop} \rangle$ | $\langle d_{xz} - \pi^*_{ip} \rangle$ | Orbital description |
|          |                   |                      | 1.714121                               | 1.499887                      | 0.785992                              | Occupation          |

6': Root 0: E = -2486.5076647107 E<sub>h</sub>

Root 1: E = -2486.4920497222 E<sub>h</sub>

SA-CASSCF transition energy:

| STATE | ROOT | MULT | $\Delta E/\text{cm}^{-1}$ |
|-------|------|------|---------------------------|
| 0:    | 0    | 1    | 0.0                       |
| 0:    | 1    | 1    | 3427.1                    |

| Root no. | Configuration no. | Configuration weight | Representative electron configurations |                               |                                       | Orbital description |
|----------|-------------------|----------------------|----------------------------------------|-------------------------------|---------------------------------------|---------------------|
|          |                   |                      | <76>                                   | <77>                          | <78>                                  |                     |
| 0        | 1                 | 0.62185              | $\uparrow\downarrow$                   | $\uparrow\downarrow$          |                                       |                     |
| 0        | 2                 | 0.25367              | $\uparrow$                             | $\uparrow\downarrow$          | $\downarrow$                          |                     |
| 0        | 3                 | 0.12393              |                                        | $\uparrow\downarrow$          | $\uparrow\downarrow$                  |                     |
| 1        | 1                 | 0.89106              | $\uparrow\downarrow$                   | $\uparrow$                    | $\downarrow$                          |                     |
| 1        | 2                 | 0.10851              | $\uparrow$                             | $\downarrow$                  | $\uparrow\downarrow$                  |                     |
|          |                   |                      | $\langle d_{xz} + \pi^*_{ip} \rangle$  | $\langle \pi^*_{oop} \rangle$ | $\langle d_{xz} - \pi^*_{ip} \rangle$ | Orbital description |
|          |                   |                      | 1.694851                               | 1.499885                      | 0.805264                              | Occupation          |

### SI 11.3. CASSCF computational results: SA-CAS(4,3) S = 0 (v = 0) and S = 1 (v = 0)

1': State 0: E = -2472.6905814538 E<sub>h</sub>

State 1: E = -2472.6725365328 E<sub>h</sub>

SA-CASSCF transition energy:

| STATE | ROOT | MULT | $\Delta E/\text{cm}^{-1}$ |
|-------|------|------|---------------------------|
| 0:    | 0    | 1    | 0.0                       |
| 1:    | 0    | 3    | 3960.4                    |

| State         | Configuration no. | Configuration weight | Representative electron configurations |                               |                                       | Orbital description |
|---------------|-------------------|----------------------|----------------------------------------|-------------------------------|---------------------------------------|---------------------|
|               |                   |                      | <79>                                   | <80>                          | <81>                                  |                     |
| S = 0 (v = 0) | 1                 | 0.66600              | $\uparrow\downarrow$                   | $\uparrow\downarrow$          |                                       |                     |
| S = 0 (v = 0) | 2                 | 0.21202              | $\uparrow$                             | $\uparrow\downarrow$          | $\downarrow$                          |                     |
| S = 0 (v = 0) | 3                 | 0.12186              |                                        | $\uparrow\downarrow$          | $\uparrow\downarrow$                  |                     |
| S = 1 (v = 0) | 1                 | 0.89689              | $\uparrow\downarrow$                   | $\uparrow$                    | $\uparrow$                            |                     |
| S = 1 (v = 0) | 2                 | 0.10311              | $\uparrow$                             | $\uparrow$                    | $\uparrow\downarrow$                  |                     |
|               |                   |                      | $\langle d_{xz} + \pi^*_{ip} \rangle$  | $\langle \pi^*_{oop} \rangle$ | $\langle d_{xz} - \pi^*_{ip} \rangle$ | Orbital description |
|               |                   |                      | 1.720571                               | 1.499882                      | 0.779547                              | Occupation          |

2': State 0: E = -2682.2647605964 E<sub>h</sub>

State 1: E = -2682.2279283320 E<sub>h</sub>

SA-CASSCF transition energy:

| STATE | ROOT | MULT | $\Delta E/\text{cm}^{-1}$ |
|-------|------|------|---------------------------|
| 0:    | 0    | 1    | 0.0                       |
| 1:    | 0    | 3    | 8083.7                    |

| State         | Configuration no. | Configuration weight | Representative electron configurations |                                       |                                       | Orbital description |
|---------------|-------------------|----------------------|----------------------------------------|---------------------------------------|---------------------------------------|---------------------|
|               |                   |                      | <99>                                   | <100>                                 | <101>                                 |                     |
| S = 0 (v = 0) | 1                 | 0.76831              | $\uparrow\downarrow$                   | $\uparrow\downarrow$                  |                                       |                     |
| S = 0 (v = 0) | 2                 | 0.21851              | $\uparrow\downarrow$                   |                                       | $\uparrow\downarrow$                  |                     |
| S = 1 (v = 0) | 1                 | 0.98918              | $\uparrow\downarrow$                   | $\uparrow$                            | $\uparrow$                            |                     |
|               |                   |                      | $\langle \pi^*_{oop} \rangle$          | $\langle d_{xz} + \pi^*_{ip} \rangle$ | $\langle d_{xz} - \pi^*_{ip} \rangle$ | Orbital description |
|               |                   |                      | 1.98810                                | 1.27931                               | 0.73258                               | Occupation          |



3': State 0: E = -4233.1875648976 E<sub>h</sub>

State 1: E = -4233.1377818188 E<sub>h</sub>

SA-CASSCF transition energy:

| STATE | ROOT | MULT | $\Delta E/\text{cm}^{-1}$ |
|-------|------|------|---------------------------|
| 0:    | 0    | 1    | 0.0                       |
| 1:    | 0    | 3    | 10926.1                   |

| State         | Configuration no. | Configuration weight | Representative electron configurations |                                  |                                  | Orbital description |
|---------------|-------------------|----------------------|----------------------------------------|----------------------------------|----------------------------------|---------------------|
|               |                   |                      | <183>                                  | <184>                            | <185>                            |                     |
| S = 0 (v = 0) | 1                 | 0.79557              | ↑↓                                     | ↑↓                               |                                  |                     |
| S = 0 (v = 0) | 2                 | 0.20439              | ↑↓                                     |                                  | ↑↓                               |                     |
| S = 1 (v = 0) | 1                 | 1.00000              | ↑↓                                     | ↑                                | ↑                                |                     |
|               |                   |                      | < $\pi^*_{\text{oop}}$ >               | < $d_{xz} + \pi^*_{\text{ip}}$ > | < $d_{xz} - \pi^*_{\text{ip}}$ > |                     |
|               |                   |                      | 1.999956                               | 1.295614                         | 0.704431                         | Occupation          |

6': State 0: E = -2486.5078007276 E<sub>h</sub>

State 1: E = -2486.4952522370 E<sub>h</sub>

SA-CASSCF transition energy:

| STATE | ROOT | MULT | $\Delta E/\text{cm}^{-1}$ |
|-------|------|------|---------------------------|
| 0:    | 0    | 1    | 0.0                       |
| 1:    | 0    | 3    | 2754.1                    |

| State         | Configuration no. | Configuration weight | Representative electron configurations |                          |                                  | Orbital description |
|---------------|-------------------|----------------------|----------------------------------------|--------------------------|----------------------------------|---------------------|
|               |                   |                      | <76>                                   | <77>                     | <78>                             |                     |
| S = 0 (v = 0) | 1                 | 0.63284              | ↑↓                                     | ↑↓                       |                                  |                     |
| S = 0 (v = 0) | 2                 | 0.23708              | ↑                                      | ↑↓                       | ↓                                |                     |
| S = 0 (v = 0) | 3                 | 0.12425              |                                        | ↑↓                       | ↑↓                               |                     |
| S = 1 (v = 0) | 1                 | 0.89466              | ↑↓                                     | ↑                        | ↑                                |                     |
| S = 1 (v = 0) | 2                 | 0.10224              | ↑                                      | ↑                        | ↑↓                               |                     |
|               |                   |                      | < $d_{xz} + \pi^*_{\text{ip}}$ >       | < $\pi^*_{\text{oop}}$ > | < $d_{xz} - \pi^*_{\text{ip}}$ > |                     |
|               |                   |                      | 1.702680                               | 1.498509                 | 0.798811                         | Occupation          |

**SI 12.1.** MR-DDCI3 computational results: CAS(2,2)/MR-DDCI3  $S = 0$  ( $v = 0$ ),  $T_{\text{sel}} = 10^{-8}$

**1'**:  $E = -2472.971717602 E_h$ , Reference Weight = 0.9178

| Configuration no. | Configuration weight | Representative electron configurations |                                       | Orbital description |
|-------------------|----------------------|----------------------------------------|---------------------------------------|---------------------|
|                   |                      | <80>                                   | <81>                                  |                     |
| 1                 | 0.8351               | ↑↓                                     |                                       |                     |
| 2                 | 0.0827               |                                        | ↑↓                                    |                     |
|                   |                      | $\langle d_{xz} + \pi^*_{ip} \rangle$  | $\langle d_{xz} - \pi^*_{ip} \rangle$ |                     |

**2'**:  $E = -2682.527738908 E_h$ , Reference Weight = 0.9183

| Configuration no. | Configuration weight | Representative electron configurations |                                       | Orbital description |
|-------------------|----------------------|----------------------------------------|---------------------------------------|---------------------|
|                   |                      | <100>                                  | <101>                                 |                     |
| 1                 | 0.8330               | ↑↓                                     |                                       |                     |
| 2                 | 0.0854               |                                        | ↑↓                                    |                     |
|                   |                      | $\langle d_{xz} + \pi^*_{ip} \rangle$  | $\langle d_{xz} - \pi^*_{ip} \rangle$ |                     |

**3'**:  $E = -4233.462458827 E_h$ , Reference Weight = 0.9168

| Configuration no. | Configuration weight | Representative electron configurations |                                       | Orbital description |
|-------------------|----------------------|----------------------------------------|---------------------------------------|---------------------|
|                   |                      | <184>                                  | <185>                                 |                     |
| 1                 | 0.8535               | ↑↓                                     |                                       |                     |
| 2                 | 0.0633               |                                        | ↑↓                                    |                     |
|                   |                      | $\langle d_{xz} + \pi^*_{ip} \rangle$  | $\langle d_{xz} - \pi^*_{ip} \rangle$ |                     |

**4'**:  $E = -2630.677853273 E_h$ , Reference Weight = 0.9227

| Configuration no. | Configuration weight | Representative electron configurations |                                       | Orbital description |
|-------------------|----------------------|----------------------------------------|---------------------------------------|---------------------|
|                   |                      | <100>                                  | <101>                                 |                     |
| 1                 | 0.8987               | ↑↓                                     |                                       |                     |
| 2                 | 0.0239               |                                        | ↑↓                                    |                     |
|                   |                      | $\langle d_{xz} + \pi^*_{ip} \rangle$  | $\langle d_{xz} - \pi^*_{ip} \rangle$ |                     |

**5'**, CAS(5,5),  $T_{\text{sel}} = 10^{-7}$ ,  $E = -2812.148017566 E_h$ , Reference Weight = 0.8821

| Configuration no. | Configuration weight | Representative electron configurations |                                                |                          |                                                |                                        | Orbital description |
|-------------------|----------------------|----------------------------------------|------------------------------------------------|--------------------------|------------------------------------------------|----------------------------------------|---------------------|
|                   |                      | <106>                                  | <107>                                          | <108>                    | <109>                                          | <110>                                  |                     |
| 1                 | 0.8610               | ↑↓                                     | ↑↓                                             | ↑                        |                                                |                                        |                     |
| 2                 | 0.0142               | ↑↓                                     |                                                | ↑                        | ↑↓                                             |                                        |                     |
| 3                 | 0.0067               |                                        | ↑↓                                             | ↑                        |                                                | ↑↓                                     |                     |
|                   |                      | $\langle [\text{Me2NN}] - \pi \rangle$ | $\langle \text{PhN}_2\text{O}_2 - \pi \rangle$ | $\langle d_{xz} \rangle$ | $\langle \text{PhN}_2\text{O}_2 - \pi \rangle$ | $\langle [\text{Me2NN}] - \pi \rangle$ |                     |

**6'**,  $T_{\text{sel}} = 10^{-7}$ ,  $E = -2486.777499028 E_h$ , Reference Weight = 0.9171

| Configuration no. | Configuration weight | Representative electron configurations |                                       | Orbital description |
|-------------------|----------------------|----------------------------------------|---------------------------------------|---------------------|
|                   |                      | <77>                                   | <78>                                  |                     |
| 1                 | 0.8343               | ↑↓                                     |                                       |                     |
| 2                 | 0.0828               |                                        | ↑↓                                    |                     |
|                   |                      | $\langle d_{xz} + \pi^*_{ip} \rangle$  | $\langle d_{xz} - \pi^*_{ip} \rangle$ |                     |

**8'**,  $T_{\text{sel}} = 10^{-7}$ ,  $E = -2880.720082425 E_h$ , Reference Weight = 0.9091

| Configuration no. | Configuration weight | Representative electron configurations |                                       | Orbital description |
|-------------------|----------------------|----------------------------------------|---------------------------------------|---------------------|
|                   |                      | <124>                                  | <125>                                 |                     |
| 1                 | 0.8873               | ↑↓                                     |                                       |                     |
| 2                 | 0.0219               |                                        | ↑↓                                    |                     |
| 3                 | 0.0179               | ↑                                      | ↓                                     |                     |
|                   |                      | $\langle d_{xz} + \pi^*_{ip} \rangle$  | $\langle d_{xz} - \pi^*_{ip} \rangle$ |                     |

**SI 12.2.** MR-DDCI3 computational results: SA-CAS(4,3)/MR-DDCI3  $S = 0$  ( $v = 0$ ) and  $S = 0$  ( $v' = 0$ ),  $T_{sel} = 10^{-6}$

**1'**: State 0:  $E = -2473.092348272 E_h$ , Reference Weight = 0.9135

State 1:  $E = -2473.066589960 E_h$ , Reference Weight = 0.9117

SA-CASSCF/MR-DDCI3 transition energy:

| STATE | ROOT | MULT | $\Delta E/cm^{-1}$ |
|-------|------|------|--------------------|
| 0:    | 0    | 1    | 0.0                |
| 0:    | 1    | 1    | 5653.3             |

| Root no. | Configuration no. | Configuration weight | Representative electron configurations |                               |                                       | Orbital description |
|----------|-------------------|----------------------|----------------------------------------|-------------------------------|---------------------------------------|---------------------|
|          |                   |                      | <79>                                   | <80>                          | <81>                                  |                     |
| 0        | 1                 | 0.0311               |                                        | $\uparrow\downarrow$          | $\uparrow\downarrow$                  |                     |
| 0        | 2                 | 0.2239               | $\uparrow$                             | $\uparrow\downarrow$          | $\downarrow$                          |                     |
| 0        | 3                 | 0.6584               | $\uparrow\downarrow$                   | $\uparrow\downarrow$          |                                       |                     |
| 1        | 1                 | 0.0227               | $\uparrow$                             | $\downarrow$                  | $\uparrow\downarrow$                  |                     |
| 1        | 2                 | 0.8890               | $\uparrow\downarrow$                   | $\uparrow$                    | $\downarrow$                          |                     |
|          |                   |                      | $\langle d_{xz} + \pi^*_{ip} \rangle$  | $\langle \pi^*_{oop} \rangle$ | $\langle d_{xz} - \pi^*_{ip} \rangle$ |                     |

**2'**: State 0:  $E = -2682.679666836 E_h$ , Reference Weight = 0.9243

State 1:  $E = -2682.597876967 E_h$ , Reference Weight = 0.9236

SA-CASSCF/MR-DDCI3 transition energy:

| STATE | ROOT | MULT | $\Delta E/cm^{-1}$ |
|-------|------|------|--------------------|
| 0:    | 0    | 1    | 0.0                |
| 0:    | 1    | 1    | 17950.8            |

| Root no. | Configuration no. | Configuration weight | Representative electron configurations |                               |                                       | Orbital description |
|----------|-------------------|----------------------|----------------------------------------|-------------------------------|---------------------------------------|---------------------|
|          |                   |                      | <99>                                   | <100>                         | <101>                                 |                     |
| 0        | 1                 | 0.0128               |                                        | $\uparrow\downarrow$          | $\uparrow\downarrow$                  |                     |
| 0        | 2                 | 0.2666               | $\uparrow$                             | $\uparrow\downarrow$          | $\downarrow$                          |                     |
| 0        | 3                 | 0.0723               | $\uparrow\downarrow$                   | $\uparrow$                    | $\downarrow$                          |                     |
| 0        | 4                 | 0.5722               | $\uparrow\downarrow$                   | $\uparrow\downarrow$          |                                       |                     |
| 1        | 1                 | 0.0087               | $\uparrow$                             | $\downarrow$                  | $\uparrow\downarrow$                  |                     |
| 1        | 2                 | 0.0199               | $\uparrow$                             | $\uparrow\downarrow$          | $\downarrow$                          |                     |
| 1        | 3                 | 0.8417               | $\uparrow\downarrow$                   | $\uparrow$                    | $\downarrow$                          |                     |
| 1        | 4                 | 0.0519               | $\uparrow\downarrow$                   | $\uparrow\downarrow$          |                                       |                     |
|          |                   |                      | $\langle d_{xz} + \pi^*_{ip} \rangle$  | $\langle \pi^*_{oop} \rangle$ | $\langle d_{xz} - \pi^*_{ip} \rangle$ |                     |

**3'**: State 0:  $E = -4233.623711110 E_h$ , Reference Weight = 0.9270

State 1:  $E = -4233.525219757 E_h$ , Reference Weight = 0.9166

SA-CASSCF/MR-DDCI3 transition energy:

| STATE | ROOT | MULT | $\Delta E/cm^{-1}$ |
|-------|------|------|--------------------|
| 0:    | 0    | 1    | 0.0                |
| 0:    | 1    | 1    | 21616.4            |

| Root no. | Configuration no. | Configuration weight | Representative electron configurations |                               |                                       | Orbital description |
|----------|-------------------|----------------------|----------------------------------------|-------------------------------|---------------------------------------|---------------------|
|          |                   |                      | <183>                                  | <184>                         | <185>                                 |                     |
| 0        | 1                 | 0.6086               | $\uparrow\downarrow$                   | $\uparrow\downarrow$          |                                       |                     |
| 0        | 2                 | 0.3076               | $\uparrow$                             | $\uparrow\downarrow$          | $\downarrow$                          |                     |
| 0        | 3                 | 0.0108               |                                        | $\uparrow\downarrow$          | $\uparrow\downarrow$                  |                     |
| 1        | 1                 | 0.9061               | $\uparrow\downarrow$                   | $\uparrow$                    | $\downarrow$                          |                     |
| 1        | 2                 | 0.0104               | $\uparrow$                             | $\downarrow$                  | $\uparrow\downarrow$                  |                     |
|          |                   |                      | $\langle d_{xz} + \pi^*_{ip} \rangle$  | $\langle \pi^*_{oop} \rangle$ | $\langle d_{xz} - \pi^*_{ip} \rangle$ |                     |

6': State 0: E = -2486.899229290 E<sub>h</sub>, Reference Weight = 0.9210

State 1: E = -2486.878866416 E<sub>h</sub>, Reference Weight = 0.9218

SA-CASSCF/MR-DDCI3 transition energy:

| STATE | ROOT | MULT | $\Delta E/\text{cm}^{-1}$ |
|-------|------|------|---------------------------|
| 0:    | 0    | 1    | 0.0                       |
| 0:    | 1    | 1    | 4469.1                    |

| Root no. | Configuration no. | Configuration weight | Representative electron configurations |                               |                                       | Orbital description |
|----------|-------------------|----------------------|----------------------------------------|-------------------------------|---------------------------------------|---------------------|
|          |                   |                      | <76>                                   | <77>                          | <78>                                  |                     |
| 0        | 1                 | 0.6178               | $\uparrow\downarrow$                   | $\uparrow\downarrow$          |                                       |                     |
| 0        | 2                 | 0.2743               | $\uparrow$                             | $\uparrow\downarrow$          | $\downarrow$                          |                     |
| 0        | 3                 | 0.0283               |                                        | $\uparrow\downarrow$          | $\uparrow\downarrow$                  |                     |
| 1        | 1                 | 0.9002               | $\uparrow\downarrow$                   | $\uparrow$                    | $\downarrow$                          |                     |
| 1        | 2                 | 0.0212               | $\uparrow$                             | $\downarrow$                  | $\uparrow\downarrow$                  |                     |
|          |                   |                      | $\langle d_{xz} + \pi^*_{ip} \rangle$  | $\langle \pi^*_{oop} \rangle$ | $\langle d_{xz} - \pi^*_{ip} \rangle$ |                     |

**SI 12.3.** MR-DDCI3 computational results: SA-CAS(4,3)/MR-DDCI3 S = 0 (v = 0) and S = 1 (v = 0), T<sub>sel</sub> = 10<sup>-6</sup>

1': S = 0 (v = 0), STATE 0: E = -2473.092701833 E<sub>h</sub>, Reference Weight = 0.9134

S = 1 (v = 0), STATE 0: E = -2473.080074370 E<sub>h</sub>, Reference Weight = 0.9072

SA-CASSCF/MR-DDCI3 transition energy:

| STATE | ROOT | MULT | $\Delta E/\text{cm}^{-1}$ |
|-------|------|------|---------------------------|
| 0:    | 0    | 1    | 0.0                       |
| 1:    | 0    | 3    | 2771.4                    |

| State         | Configuration no. | Configuration weight | Representative electron configurations |                               |                                       | Orbital description |
|---------------|-------------------|----------------------|----------------------------------------|-------------------------------|---------------------------------------|---------------------|
|               |                   |                      | <79>                                   | <80>                          | <81>                                  |                     |
| S = 0 (v = 0) | 1                 | 0.6674               | $\uparrow\downarrow$                   | $\uparrow\downarrow$          |                                       |                     |
| S = 0 (v = 0) | 2                 | 0.2125               | $\uparrow$                             | $\uparrow\downarrow$          | $\downarrow$                          |                     |
| S = 0 (v = 0) | 3                 | 0.0333               |                                        | $\uparrow\downarrow$          | $\uparrow\downarrow$                  |                     |
| S = 1 (v = 0) | 1                 | 0.8961               | $\uparrow\downarrow$                   | $\uparrow$                    | $\uparrow$                            |                     |
| S = 1 (v = 0) | 2                 | 0.0112               | $\uparrow$                             | $\uparrow$                    | $\uparrow\downarrow$                  |                     |
|               |                   |                      | $\langle d_{xz} + \pi^*_{ip} \rangle$  | $\langle \pi^*_{oop} \rangle$ | $\langle d_{xz} - \pi^*_{ip} \rangle$ |                     |

2': S = 0 (v = 0), STATE 0: E = -2682.664865507 E<sub>h</sub>, Reference Weight = 0.9330

S = 1 (v = 0), STATE 0: E = -2682.614121830 E<sub>h</sub>, Reference Weight = 0.9400

SA-CASSCF/MR-DDCI3 transition energy:

| STATE | ROOT | MULT | $\Delta E/\text{cm}^{-1}$ |
|-------|------|------|---------------------------|
| 0:    | 0    | 1    | 0.0                       |
| 1:    | 0    | 3    | 11136.9                   |

| State         | Configuration no. | Configuration weight | Representative electron configurations |                                       |                                       | Orbital description |
|---------------|-------------------|----------------------|----------------------------------------|---------------------------------------|---------------------------------------|---------------------|
|               |                   |                      | <99>                                   | <100>                                 | <101>                                 |                     |
| S = 0 (v = 0) | 1                 | 0.8308               | $\uparrow\downarrow$                   | $\uparrow\downarrow$                  |                                       |                     |
| S = 0 (v = 0) | 2                 | 0.0078               | $\uparrow\downarrow$                   | $\uparrow$                            | $\downarrow$                          |                     |
| S = 0 (v = 0) | 3                 | 0.0750               | $\uparrow\downarrow$                   |                                       | $\uparrow\downarrow$                  |                     |
| S = 0 (v = 0) | 4                 | 0.0183               | $\uparrow$                             | $\uparrow\downarrow$                  | $\downarrow$                          |                     |
| S = 1 (v = 0) | 1                 | 0.9091               | $\uparrow\downarrow$                   | $\uparrow$                            | $\uparrow$                            |                     |
| S = 1 (v = 0) | 2                 | 0.0306               | $\uparrow$                             | $\uparrow\downarrow$                  | $\uparrow$                            |                     |
|               |                   |                      | $\langle \pi^*_{oop} \rangle$          | $\langle d_{xz} + \pi^*_{ip} \rangle$ | $\langle d_{xz} - \pi^*_{ip} \rangle$ |                     |

3': S = 0 (v = 0), STATE 0: E = -4233.604200056 E<sub>h</sub>, Reference Weight = 0.9332

S = 1 (v = 0), STATE 0: E = -4233.535888450 E<sub>h</sub>, Reference Weight = 0.9396

SA-CASSCF/MR-DDCI3 transition energy:

| STATE | ROOT | MULT | $\Delta E/\text{cm}^{-1}$ |
|-------|------|------|---------------------------|
| 0:    | 0    | 1    | 0.0                       |
| 1:    | 0    | 3    | 14992.7                   |

| State         | Configuration no. | Configuration weight | Representative electron configurations |                                  |                                  | Orbital description |
|---------------|-------------------|----------------------|----------------------------------------|----------------------------------|----------------------------------|---------------------|
|               |                   |                      | <183>                                  | <184>                            | <185>                            |                     |
| S = 0 (v = 0) | 1                 | 0.8593               | ↑↓                                     | ↑↓                               |                                  |                     |
| S = 0 (v = 0) | 2                 | 0.0739               | ↑↓                                     |                                  | ↑↓                               |                     |
| S = 1 (v = 0) | 1                 | 0.9396               | ↑↓                                     | ↑                                | ↑                                |                     |
|               |                   |                      | < $\pi^*_{\text{oop}}$ >               | < $d_{xz} + \pi^*_{\text{ip}}$ > | < $d_{xz} - \pi^*_{\text{ip}}$ > |                     |

6': S = 0 (v = 0), STATE 0: E = -2486.899442678 E<sub>h</sub>, Reference Weight = 0.9224

S = 1 (v = 0), STATE 0: E = -2486.891222564 E<sub>h</sub>, Reference Weight = 0.9172

SA-CASSCF/MR-DDCI3 transition energy:

| STATE | ROOT | MULT | $\Delta E/\text{cm}^{-1}$ |
|-------|------|------|---------------------------|
| 0:    | 0    | 1    | 0.0                       |
| 1:    | 0    | 3    | 1804.1                    |

| State         | Configuration no. | Configuration weight | Representative electron configurations |                          |                                  | Orbital description |
|---------------|-------------------|----------------------|----------------------------------------|--------------------------|----------------------------------|---------------------|
|               |                   |                      | <76>                                   | <77>                     | <78>                             |                     |
| S = 0 (v = 0) | 1                 | 0.6375               | ↑↓                                     | ↑↓                       |                                  |                     |
| S = 0 (v = 0) | 2                 | 0.2535               | ↑                                      | ↑↓                       | ↓                                |                     |
| S = 0 (v = 0) | 3                 | 0.0301               |                                        | ↑↓                       | ↑↓                               |                     |
| S = 1 (v = 0) | 1                 | 0.9049               | ↑↓                                     | ↑                        | ↑                                |                     |
| S = 1 (v = 0) | 2                 | 0.0104               | ↑                                      | ↑                        | ↑↓                               |                     |
|               |                   |                      | < $d_{xz} + \pi^*_{\text{ip}}$ >       | < $\pi^*_{\text{oop}}$ > | < $d_{xz} - \pi^*_{\text{ip}}$ > |                     |

**SI 13.1. OVB analysis of CAS(2,2) wavefunctions.**

**1':** E = -2472.6940598615 E<sub>h</sub>

| Configuration no. | Configuration weight | Representative electron configurations |                     | Valence bond description                |
|-------------------|----------------------|----------------------------------------|---------------------|-----------------------------------------|
|                   |                      | <80>                                   | <81>                |                                         |
| 1                 | 0.87605              | ↑                                      | ↓                   | Cu(II)/(O <sub>2</sub> ) <sup>*1-</sup> |
| 2                 | 0.09140              | ↑↓                                     |                     | Cu(I)/(O <sub>2</sub> ) <sup>0</sup>    |
| 3                 | 0.03255              |                                        | ↑↓                  | Cu(III)/(O <sub>2</sub> ) <sup>2-</sup> |
|                   |                      | <d <sub>xz</sub> >                     | <π* <sub>ip</sub> > | Orbital description                     |

**2':** E = -2682.2671563621 E<sub>h</sub>

| Configuration no. | Configuration weight | Representative electron configurations |                     | Valence bond description     |
|-------------------|----------------------|----------------------------------------|---------------------|------------------------------|
|                   |                      | <100>                                  | <101>               |                              |
| 1                 | 0.88525              | ↑                                      | ↓                   | Cu(II)/(PhNO) <sup>*1-</sup> |
| 2                 | 0.09708              | ↑↓                                     |                     | Cu(I)/(PhNO) <sup>0</sup>    |
| 3                 | 0.01768              |                                        | ↑↓                  | Cu(III)/(PhNO) <sup>2-</sup> |
|                   |                      | <d <sub>xz</sub> >                     | <π* <sub>ip</sub> > | Orbital description          |

**3':** E = -4233.1912366010 E<sub>h</sub>

| Configuration no. | Configuration weight | Representative electron configurations |                     | Valence bond description                                |
|-------------------|----------------------|----------------------------------------|---------------------|---------------------------------------------------------|
|                   |                      | <184>                                  | <185>               |                                                         |
| 1                 | 0.84833              | ↑                                      | ↓                   | Cu(II)/(N <sub>2</sub> Ar <sub>2</sub> ) <sup>*1-</sup> |
| 2                 | 0.13623              | ↑↓                                     |                     | Cu(I)/(N <sub>2</sub> Ar <sub>2</sub> ) <sup>0</sup>    |
| 3                 | 0.01544              |                                        | ↑↓                  | Cu(III)/(N <sub>2</sub> Ar <sub>2</sub> ) <sup>2-</sup> |
|                   |                      | <d <sub>xz</sub> >                     | <π* <sub>ip</sub> > | Orbital description                                     |

**4':** E = -2630.4389282910 E<sub>h</sub>

| Configuration no. | Configuration weight | Representative electron configurations |                     | Valence bond description                     |
|-------------------|----------------------|----------------------------------------|---------------------|----------------------------------------------|
|                   |                      | <100>                                  | <101>               |                                              |
| 1                 | 0.66525              | ↑                                      | ↓                   | Cu(II)/(PhCHCH <sub>2</sub> ) <sup>*1-</sup> |
| 2                 | 0.32415              | ↑↓                                     |                     | Cu(I)/(PhCHCH <sub>2</sub> ) <sup>0</sup>    |
| 3                 | 0.01060              |                                        | ↑↓                  | Cu(III)/(PhCHCH <sub>2</sub> ) <sup>2-</sup> |
|                   |                      | <d <sub>xz</sub> >                     | <π* <sub>ip</sub> > | Orbital description                          |

**5':** E = -2811.6389037920 E<sub>h</sub>

| Configuration no. | Configuration weight | Representative electron configurations |           |                                    |                                    |           | Valence bond description |
|-------------------|----------------------|----------------------------------------|-----------|------------------------------------|------------------------------------|-----------|--------------------------|
|                   |                      | <106>                                  | <107>     | <108>                              | <109>                              | <110>     |                          |
| 1                 | 0.39944              | ↑                                      | ↑         | ↑                                  | ↓                                  | ↓         | Cu(II)                   |
| 2                 | 0.27201              | ↑                                      | ↑↓        | ↑                                  | ↓                                  |           | Cu(II)                   |
| 3                 | 0.12912              | ↑                                      | ↑         |                                    | ↑↓                                 | ↓         | Cu(II)                   |
| 4                 | 0.08614              | ↑                                      | ↑↓        |                                    | ↑↓                                 |           | Cu(II)                   |
| 5                 | 0.04058              | ↑                                      | ↑         | ↑↓                                 |                                    | ↓         | Cu(II)                   |
| 6                 | 0.03112              | ↑                                      |           | ↑                                  | ↓                                  | ↑↓        | Cu(II)                   |
| 7                 | 0.02820              | ↑                                      | ↑↓        | ↑↓                                 |                                    |           | Cu(II)                   |
| 8                 | 0.01027              | ↑                                      |           |                                    | ↑↓                                 | ↑↓        | Cu(II)                   |
|                   |                      | <d <sub>xz</sub> >                     | <[Me2NN]> | <PhN <sub>2</sub> O <sub>2</sub> > | <PhN <sub>2</sub> O <sub>2</sub> > | <[Me2NN]> | Orbital description      |

6': E = -2486.5112634198 E<sub>h</sub>

| Configuration no. | Configuration weight | Representative electron configurations |                     | Valence bond description                |
|-------------------|----------------------|----------------------------------------|---------------------|-----------------------------------------|
|                   |                      | <77>                                   | <78>                |                                         |
| 1                 | 0.88855              | ↑                                      | ↓                   | Cu(II)/(O <sub>2</sub> ) <sup>*1-</sup> |
| 2                 | 0.08562              | ↑↓                                     |                     | Cu(I)/(O <sub>2</sub> ) <sup>0</sup>    |
| 3                 | 0.02583              |                                        | ↑↓                  | Cu(III)/(O <sub>2</sub> ) <sup>2-</sup> |
|                   |                      | <d <sub>xz</sub> >                     | <π* <sub>ip</sub> > | Orbital description                     |

8: E = -2880.4590358088 E<sub>h</sub>

| Configuration no. | Configuration weight | Representative electron configurations |                     | Valence bond description                    |
|-------------------|----------------------|----------------------------------------|---------------------|---------------------------------------------|
|                   |                      | <124>                                  | <125>               |                                             |
| 1                 | 0.75139              | ↑                                      | ↓                   | Cu(II)/(PhNCH <sub>2</sub> ) <sup>*1-</sup> |
| 2                 | 0.23590              | ↑↓                                     |                     | Cu(I)/(PhNCH <sub>2</sub> ) <sup>0</sup>    |
| 3                 | 0.01271              |                                        | ↑↓                  | Cu(III)/(PhNCH <sub>2</sub> ) <sup>2-</sup> |
|                   |                      | <d <sub>xz</sub> >                     | <π* <sub>ip</sub> > | Orbital description                         |

### SI 13.2. OVB analysis of CAS(2,2)/MR-DDCI3 wavefunctions.

1': E = -2472.977043451 E<sub>h</sub>, Reference Weight = 0.9176

| Configuration no. | Configuration weight | Representative electron configurations |                     | Valence bond description                |
|-------------------|----------------------|----------------------------------------|---------------------|-----------------------------------------|
|                   |                      | <80>                                   | <81>                |                                         |
| 1                 | 0.7023               | ↑                                      | ↓                   | Cu(II)/(O <sub>2</sub> ) <sup>*1-</sup> |
| 2                 | 0.1724               | ↑↓                                     |                     | Cu(I)/(O <sub>2</sub> ) <sup>0</sup>    |
| 3                 | 0.0429               |                                        | ↑↓                  | Cu(III)/(O <sub>2</sub> ) <sup>2-</sup> |
|                   |                      | <d <sub>xz</sub> >                     | <π* <sub>ip</sub> > | Orbital description                     |

2': E = -2682.542703466 E<sub>h</sub>, Reference Weight = 0.9239

| Configuration no. | Configuration weight | Representative electron configurations |                     | Valence bond description     |
|-------------------|----------------------|----------------------------------------|---------------------|------------------------------|
|                   |                      | <100>                                  | <101>               |                              |
| 1                 | 0.6788               | ↑                                      | ↓                   | Cu(II)/(PhNO) <sup>*1-</sup> |
| 2                 | 0.2236               | ↑↓                                     |                     | Cu(I)/(PhNO) <sup>0</sup>    |
| 3                 | 0.0215               |                                        | ↑↓                  | Cu(III)/(PhNO) <sup>2-</sup> |
|                   |                      | <d <sub>xz</sub> >                     | <π* <sub>ip</sub> > | Orbital description          |

3': E = -4233.486472952 E<sub>h</sub>, Reference Weight = 0.9186

| Configuration no. | Configuration weight | Representative electron configurations |                     | Valence bond description                                             |
|-------------------|----------------------|----------------------------------------|---------------------|----------------------------------------------------------------------|
|                   |                      | <184>                                  | <185>               |                                                                      |
| 1                 | 0.6019               | ↑                                      | ↓                   | Cu(II)/(N <sub>2</sub> Ar <sup>F</sup> <sub>2</sub> ) <sup>*1-</sup> |
| 2                 | 0.2989               | ↑↓                                     |                     | Cu(I)/(N <sub>2</sub> Ar <sup>F</sup> <sub>2</sub> ) <sup>0</sup>    |
| 3                 | 0.0178               |                                        | ↑↓                  | Cu(III)/(N <sub>2</sub> Ar <sup>F</sup> <sub>2</sub> ) <sup>2-</sup> |
|                   |                      | <d <sub>xz</sub> >                     | <π* <sub>ip</sub> > | Orbital description                                                  |

4': E = -2630.697827275 E<sub>h</sub>, Reference Weight = 0.9220

| Configuration no. | Configuration weight | Representative electron configurations |                     | Valence bond description                     |
|-------------------|----------------------|----------------------------------------|---------------------|----------------------------------------------|
|                   |                      | <100>                                  | <101>               |                                              |
| 1                 | 0.4229               | ↑                                      | ↓                   | Cu(II)/(PhCHCH <sub>2</sub> ) <sup>*1-</sup> |
| 2                 | 0.4857               | ↑↓                                     |                     | Cu(I)/(PhCHCH <sub>2</sub> ) <sup>0</sup>    |
| 3                 | 0.0134               |                                        | ↑↓                  | Cu(III)/(PhCHCH <sub>2</sub> ) <sup>2-</sup> |
|                   |                      | <d <sub>xz</sub> >                     | <π* <sub>ip</sub> > | Orbital description                          |

5': E = -2812.172236747 E<sub>h</sub>, Reference Weight = 0.8932

| Configuration no. | Configuration weight | Representative electron configurations |           |                                    |                                    |           | Valence bond description |
|-------------------|----------------------|----------------------------------------|-----------|------------------------------------|------------------------------------|-----------|--------------------------|
|                   |                      | <106>                                  | <107>     | <108>                              | <109>                              | <110>     |                          |
| 1                 | 0.3043               | ↑                                      | ↑         | ↑                                  | ↓                                  | ↓         | Cu(II)                   |
| 2                 | 0.2587               | ↑                                      | ↑↓        | ↑                                  | ↓                                  |           | Cu(II)                   |
| 3                 | 0.1219               | ↑                                      | ↑         |                                    | ↑↓                                 | ↓         | Cu(II)                   |
| 4                 | 0.1009               | ↑                                      | ↑↓        |                                    | ↑↓                                 |           | Cu(II)                   |
| 5                 | 0.0369               | ↑                                      | ↑         | ↑↓                                 |                                    | ↓         | Cu(II)                   |
| 6                 | 0.0257               | ↑                                      |           | ↑                                  | ↓                                  | ↑↓        | Cu(II)                   |
| 7                 | 0.0315               | ↑                                      | ↑↓        | ↑↓                                 |                                    |           | Cu(II)                   |
| 8                 | 0.0104               | ↑                                      |           |                                    | ↑↓                                 | ↑↓        | Cu(II)                   |
|                   |                      | <d <sub>xz</sub> >                     | <[Me2NN]> | <PhN <sub>2</sub> O <sub>2</sub> > | <PhN <sub>2</sub> O <sub>2</sub> > | <[Me2NN]> | Orbital description      |

6': E = -2486.782006468 E<sub>h</sub>, Reference Weight = 0.9192

| Configuration no. | Configuration weight | Representative electron configurations |                     | Valence bond description                |
|-------------------|----------------------|----------------------------------------|---------------------|-----------------------------------------|
|                   |                      | <77>                                   | <78>                |                                         |
| 1                 | 0.7177               | ↑                                      | ↓                   | Cu(II)/(O <sub>2</sub> ) <sup>*1-</sup> |
| 2                 | 0.1703               | ↑↓                                     |                     | Cu(I)/(O <sub>2</sub> ) <sup>0</sup>    |
| 3                 | 0.0312               |                                        | ↑↓                  | Cu(III)/(O <sub>2</sub> ) <sup>2-</sup> |
|                   |                      | <d <sub>xz</sub> >                     | <π* <sub>ip</sub> > | Orbital description                     |

8: E = -2880.733054625 E<sub>h</sub>, Reference Weight = 0.9224

| Configuration no. | Configuration weight | Representative electron configurations |                     | Valence bond description                    |
|-------------------|----------------------|----------------------------------------|---------------------|---------------------------------------------|
|                   |                      | <124>                                  | <125>               |                                             |
| 1                 | 0.4766               | ↑                                      | ↓                   | Cu(II)/(PhNCH <sub>2</sub> ) <sup>*1-</sup> |
| 2                 | 0.4317               | ↑↓                                     |                     | Cu(I)/(PhNCH <sub>2</sub> ) <sup>0</sup>    |
| 3                 | 0.0141               |                                        | ↑↓                  | Cu(III)/(PhNCH <sub>2</sub> ) <sup>2-</sup> |
|                   |                      | <d <sub>xz</sub> >                     | <π* <sub>ip</sub> > | Orbital description                         |



**SI 14.** Plot relating the experimental Cu pre-K-edge transition energy to the OVB-derived percent Cu(III) character in the molecular ground states of complexes **1-4**. The trendline was generated from the data points from complexes **1-4**:  $y = 15442 - 1.7191x$ ;  $R^2 = 0.46$ .

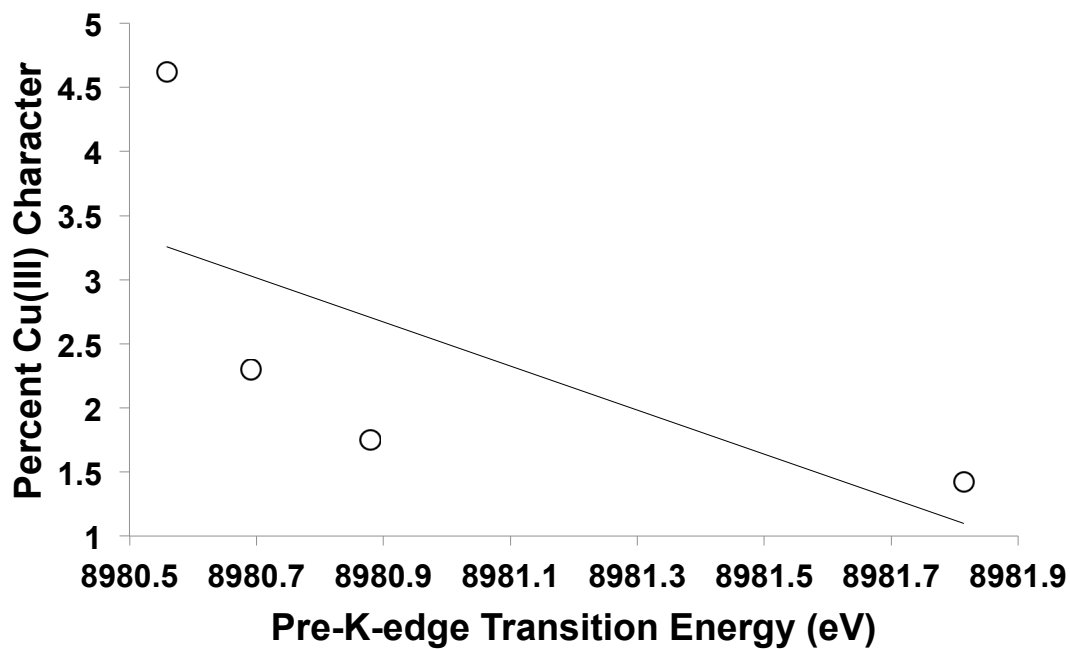

**SI 15.** Comparison of BP86 (left) and B3LYP (right) functionals for calculating pre-edge (top) and rising-edge (bottom) transition energies.

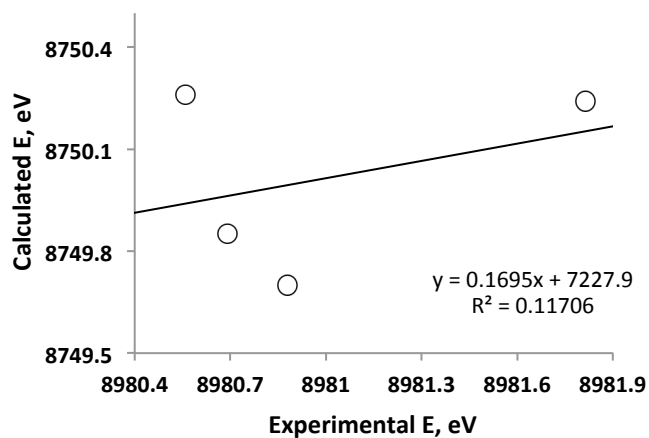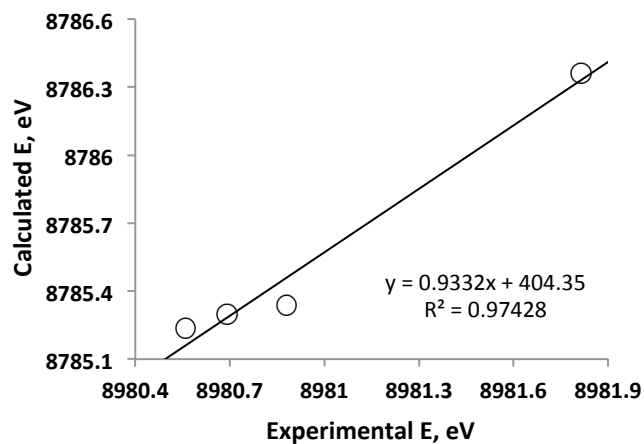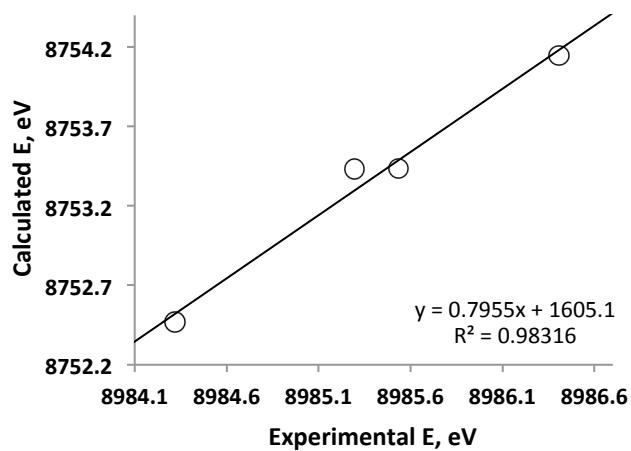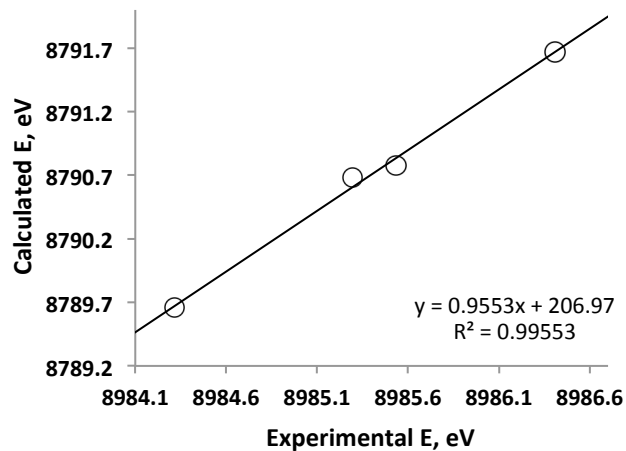

**SI 16.1** Comparison of the calculated Cu-1s energies to the experimental (top) and calculated (bottom) main rising-edge transition for complexes **1-5** (top) and **1-5, 9** (bottom).

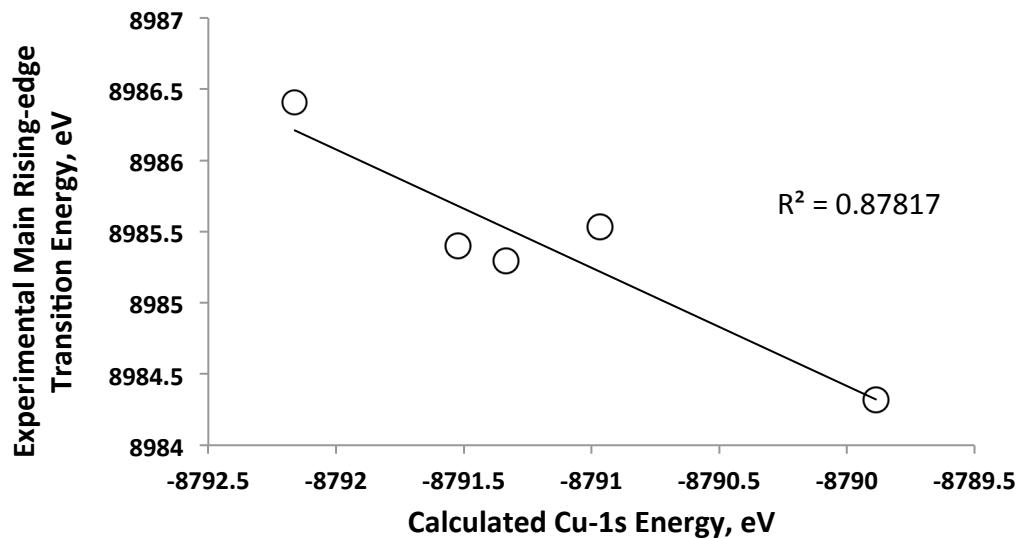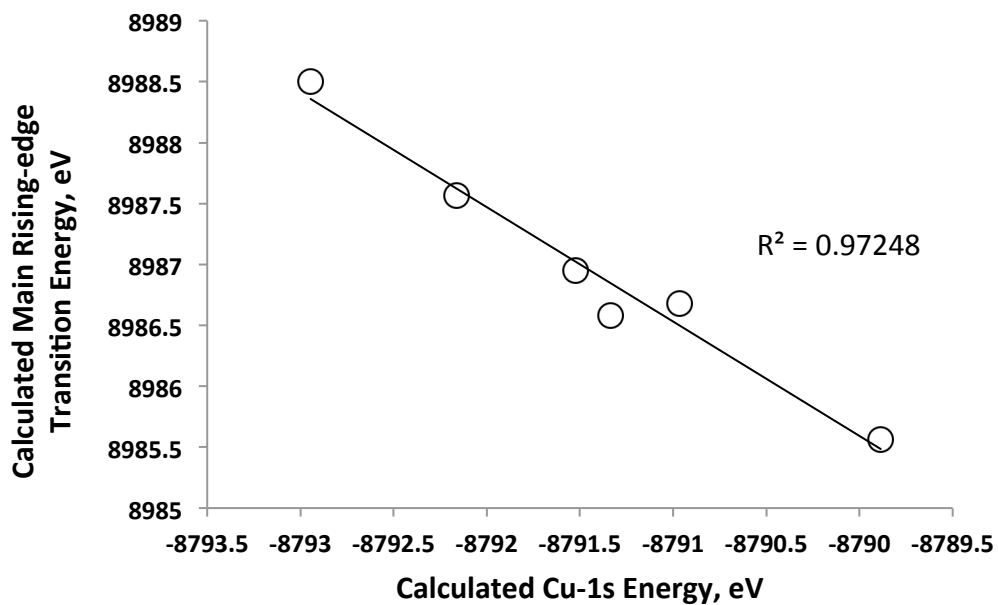

**SI 16.2** Comparison of the calculated Cu-1s energies to the experimental (top) and calculated (bottom) pre-edge transition for complexes **1-5** (top) and **1-5, 9** (bottom).

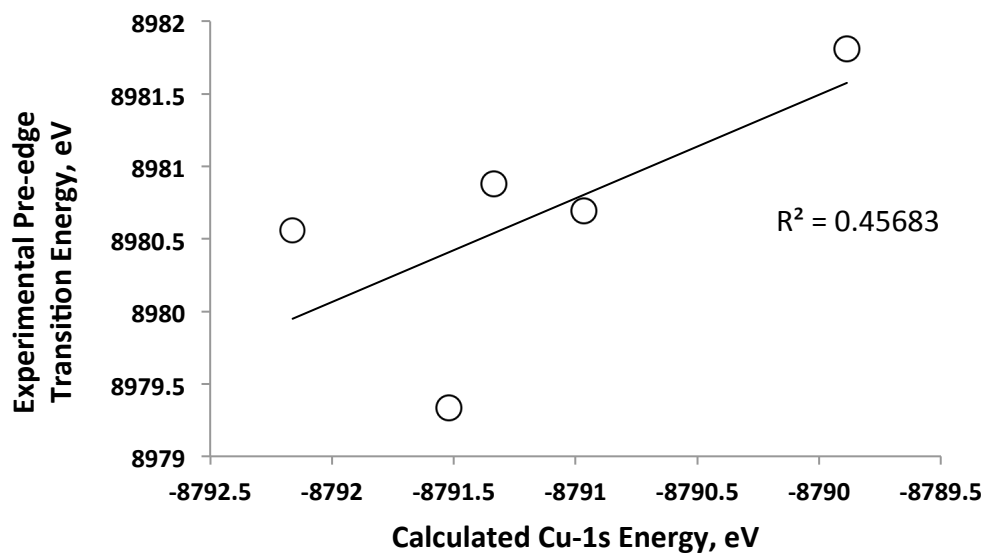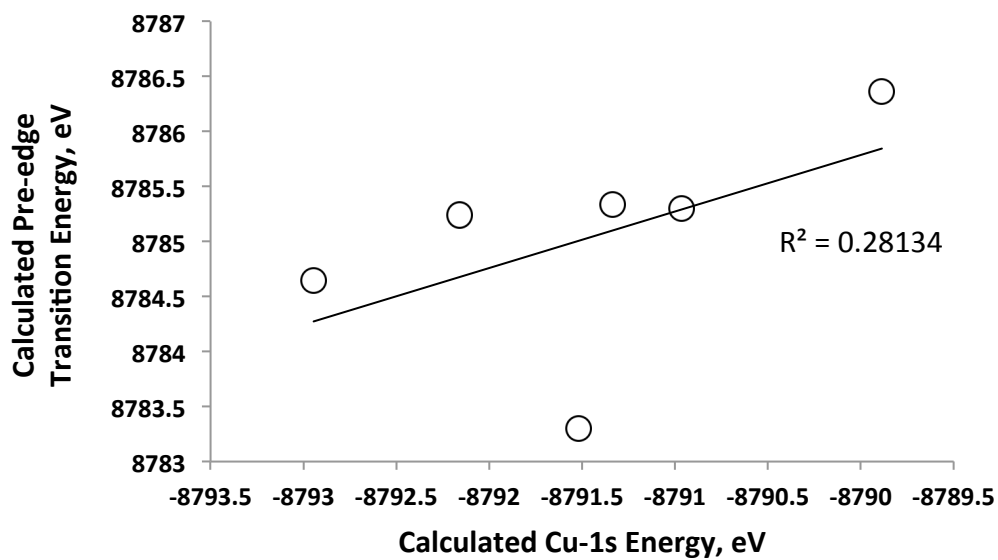

**SI 17** Comparison of the calculated Cu-1s energies to the experimental XAS data at various normalized absorption intensities along the rising edge for compounds **1-5** (top) and **1-6** (bottom). Normalized absorption values of 0.5 (blue diamonds), 0.6 (red squares), 0.7 (green triangles), and 0.8 (grey crosses) are shown.

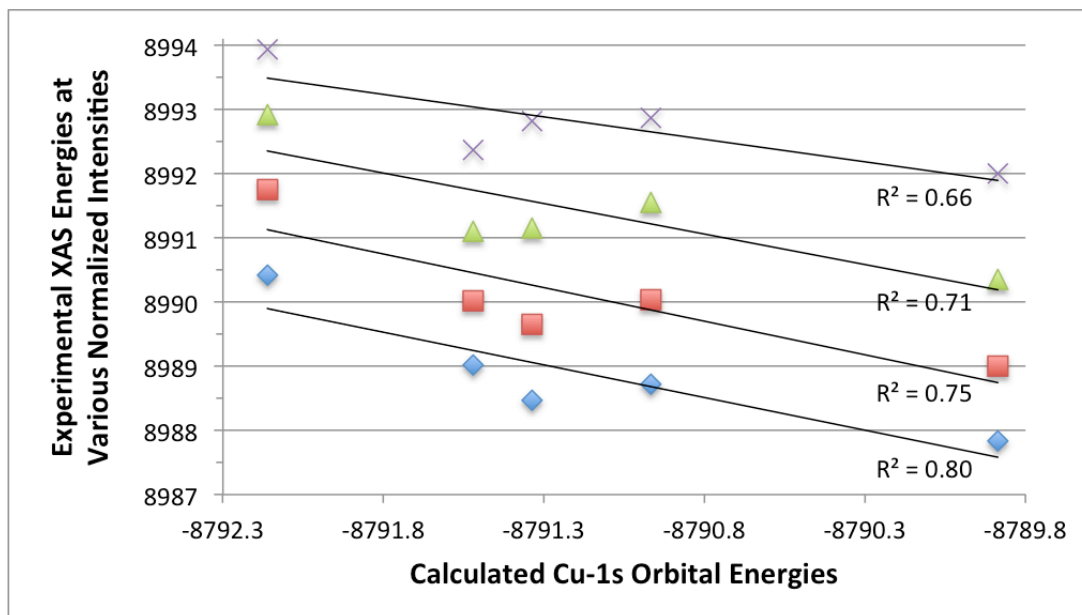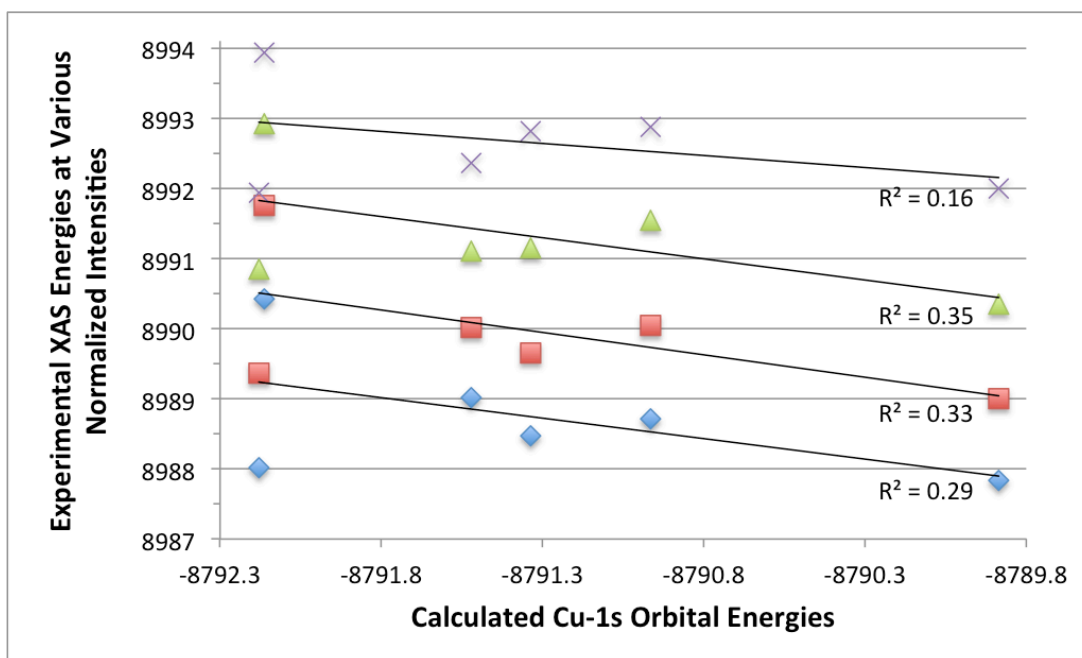

**SI 18.1.** Representative computational input for BP86 geometry optimization calculations. The def2-TZVP basis sets, along with the def2-TZV/J (1, 2, 6, 8, and their truncated analogs) or def2-TZVP/J (3-5 and their truncated analogs) auxiliary basis sets, were used for Cu and any atoms directly bound to the metal center.

```
! UKS BP86 RI SlowConv TightSCF def2-SV(P) def2-SV/J OPT NORMALPRINT
```

```
%basis NewGTO 29 "def2-TZVP" end
  NewGTO 8 "def2-TZVP" end
  NewGTO 7 "def2-TZVP" end
  NewAuxGTO 29 "def2-TZV/J" end
  NewAuxGTO 8 "def2-TZV/J" end
  NewAuxGTO 7 "def2-TZV/J" end
end
```

```
%scf directresetfreq 20
  diismaxeq 20
  MaxIter 700
end
```

```
%geom MaxIter 300
end
```

```
*xyz 0 1
.
.
.
*
```

**SI 18.2.** Representative computational input for B3LYP single-point energy calculations. The def2-TZVP basis sets, along with the def2-TZV/J (1, 2, 6, 8, and their truncated analogs) or def2-TZVP/J (3-5 and their truncated analogs) auxiliary basis sets, were used for all atoms directly bound to the metal center. Either the def2-TZVP or CP(PPP) basis sets, along with the def2-TZV/J (1, 2, 6, 8, and their truncated analogs) or def2-TZVP/J (3-5 and their truncated analogs) auxiliary basis sets, were used for Cu.

```
! UKS B3LYP RIJCOSX SlowConv TightSCF def2-SV(P) def2-SV/J NORMALPRINT
```

```
%basis NewGTO 29 "def2-TZVP" end
  NewGTO 7 "def2-TZVP" end
  NewAuxGTO 29 "def2-TZV/J" end
  NewAuxGTO 7 "def2-TZV/J" end
end
```

```
%scf directresetfreq 20
  diismaxeq 20
  MaxIter 700
end
```

```
*xyz 0 1
.
.
.
*
```

**SI 18.3.** Representative computational input for CASSCF and MR-DDCI3 calculations.

```
! RHF AllowRHF def2-SV(P) def2-SV/J NORMALPRINT
```

```
%basis NewGTO 29 "def2-TZVP" end  
NewGTO 8 "def2-TZVP" end  
NewGTO 7 "def2-TZVP" end  
NewAuxGTO 29 "def2-TZVP/J" end  
NewAuxGTO 8 "def2-TZVP/J" end  
NewAuxGTO 7 "def2-TZVP/J" end  
end
```

```
%casscf  
nel 2  
norb 2  
mult 1  
NRoots 1  
MaxIter 150  
end
```

```
%mrci  
CIType MRDDCI3  
UseIVOs false  
IntMode RITrafo  
Maxdim 100  
TSel 1e-8  
TPre 1e-4  
TNat 1e-4  
ETol 1e-5  
RTol 1e-5  
MaxDIIS 35  
MaxIter 100  
MaxMemInt 3000  
allsingles false  
NewBlock 1*  
NRoots 1  
excitations cisd  
Refs  
CAS(2,2)  
end  
end
```

```
*xyz 0 1
```

```
.  
. .  
* .
```

SI 19. Coordinates from geometry optimization calculations.

Optimized Geometry of 1

|    |           |           |           |
|----|-----------|-----------|-----------|
| Cu | 0.060734  | 0.179606  | 0.159464  |
| O  | -0.599609 | -1.535859 | 0.373372  |
| O  | 0.785890  | -1.511079 | 0.356675  |
| N  | -1.409302 | 1.358709  | 0.031877  |
| C  | -1.259255 | 2.680239  | -0.123533 |
| C  | -0.000996 | 3.319003  | -0.209393 |
| C  | 1.281531  | 2.727405  | -0.149816 |
| N  | 1.483235  | 1.412140  | -0.000363 |
| C  | 3.427949  | 0.442285  | -1.156089 |
| C  | 2.806875  | 0.864002  | 0.049316  |
| C  | 3.442011  | 0.699190  | 1.308824  |
| C  | 2.490550  | 3.639465  | -0.257996 |
| C  | 5.383110  | -0.241841 | 0.150179  |
| C  | 4.739321  | 0.149308  | 1.334028  |
| C  | 4.725607  | -0.102206 | -1.081712 |
| C  | 2.699574  | 0.542868  | -2.476274 |
| C  | 2.727589  | 1.069317  | 2.587733  |
| C  | -3.312411 | 0.583380  | 1.386668  |
| C  | -2.710728 | 0.763217  | 0.112907  |
| C  | -3.341033 | 0.311306  | -1.076584 |
| C  | -4.616414 | -0.278741 | -0.971484 |
| C  | -2.584112 | 0.986016  | 2.647839  |
| C  | -2.503024 | 3.546920  | -0.210391 |
| C  | -5.242328 | -0.433665 | 0.274904  |
| C  | -4.588140 | -0.012575 | 1.442646  |
| C  | -2.644370 | 0.429372  | -2.412298 |
| H  | 3.130467  | 3.562427  | 0.649016  |
| H  | 2.182124  | 4.697314  | -0.383895 |
| H  | 3.134865  | 3.353360  | -1.118553 |
| H  | -0.022554 | 4.410321  | -0.339860 |
| H  | 6.397240  | -0.672124 | 0.189100  |
| H  | 5.245439  | 0.018772  | 2.305740  |
| H  | 5.220784  | -0.431063 | -2.011142 |
| H  | 3.337335  | 0.181631  | -3.311038 |
| H  | 2.384578  | 1.583683  | -2.710962 |
| H  | 1.771765  | -0.073042 | -2.463270 |
| H  | 3.378710  | 0.897513  | 3.471338  |
| H  | 1.806620  | 0.455871  | 2.716855  |
| H  | 2.402677  | 2.133492  | 2.601707  |
| H  | -5.119083 | -0.630863 | -1.888251 |
| H  | -1.639664 | 0.405966  | 2.759886  |
| H  | -3.209605 | 0.796556  | 3.546215  |
| H  | -2.296342 | 2.060981  | 2.649566  |
| H  | -3.153165 | 3.232767  | -1.056726 |
| H  | -2.236179 | 4.614750  | -0.347217 |
| H  | -3.121622 | 3.451161  | 0.709471  |
| H  | -6.239784 | -0.898732 | 0.337700  |
| H  | -5.068483 | -0.155241 | 2.425640  |
| H  | -3.285943 | 0.040460  | -3.231524 |
| H  | -1.695572 | -0.153706 | -2.415043 |
| H  | -2.370915 | 1.479136  | -2.658895 |

Optimized Geometry of 1'

|    |           |           |          |
|----|-----------|-----------|----------|
| Cu | 0.062529  | 0.178744  | 0.159259 |
| O  | -0.598708 | -1.536354 | 0.373348 |

|   |           |           |           |
|---|-----------|-----------|-----------|
| O | 0.786805  | -1.512283 | 0.356770  |
| N | -1.406895 | 1.358579  | 0.031377  |
| C | -1.256160 | 2.680010  | -0.124205 |
| C | 0.002432  | 3.318120  | -0.210043 |
| C | 1.284652  | 2.725877  | -0.150270 |
| N | 1.485672  | 1.410530  | -0.000616 |
| C | 3.429993  | 0.439522  | -1.156034 |
| C | 2.809028  | 0.861725  | 0.049257  |
| C | 3.443969  | 0.696765  | 1.308844  |
| C | 5.384690  | -0.245418 | 0.150502  |
| C | 4.740996  | 0.146225  | 1.334239  |
| C | 4.727367  | -0.105620 | -1.081466 |
| C | -3.310518 | 0.584410  | 1.386108  |
| C | -2.708631 | 0.763761  | 0.112375  |
| C | -3.339062 | 0.312005  | -1.077108 |
| C | -4.614753 | -0.277377 | -0.972038 |
| C | -5.240855 | -0.431807 | 0.274316  |
| C | -4.586556 | -0.010887 | 1.442057  |
| H | -0.018854 | 4.411833  | -0.341081 |
| H | 6.398208  | -0.676198 | 0.189651  |
| H | 5.253768  | 0.019183  | 2.303173  |
| H | 5.229321  | -0.430318 | -2.008896 |
| H | -5.124647 | -0.624972 | -1.886721 |
| H | -6.238158 | -0.896338 | 0.337026  |
| H | -5.074139 | -0.149820 | 2.422261  |
| H | -2.177169 | 3.289677  | -0.188550 |
| H | 2.181420  | 3.368686  | -0.233068 |
| H | 2.898947  | 0.547441  | -2.114248 |
| H | 2.923264  | 1.001435  | 2.229349  |
| H | -2.781373 | 0.912556  | 2.293604  |
| H | -2.831784 | 0.432453  | -2.046627 |

Optimized Geometry of 2

|    |           |           |           |
|----|-----------|-----------|-----------|
| Cu | 0.025687  | 0.047517  | -0.031281 |
| O  | -0.712601 | -1.684482 | -0.187651 |
| N  | 0.607597  | -1.848507 | -0.107112 |
| C  | 2.434061  | -2.561275 | 1.302995  |
| C  | 2.934189  | -3.152695 | 2.472228  |
| C  | 0.146780  | -2.850683 | 2.144747  |
| C  | 2.051231  | -3.596682 | 3.474717  |
| C  | 0.659070  | -3.447058 | 3.303817  |
| C  | 1.038188  | -2.398939 | 1.141162  |
| H  | -0.936441 | -2.736148 | 1.982712  |
| H  | -0.031292 | -3.808569 | 4.085085  |
| H  | 2.446613  | -4.070809 | 4.388910  |
| H  | 4.022954  | -3.275908 | 2.599338  |
| H  | 3.106402  | -2.222680 | 0.498413  |
| N  | -1.461780 | 1.262467  | -0.007997 |
| C  | -1.293528 | 2.586079  | -0.101312 |
| C  | -0.023800 | 3.207712  | -0.186271 |
| C  | 1.259442  | 2.615221  | -0.147391 |
| N  | 1.472961  | 1.294195  | -0.035431 |
| C  | 3.449970  | 0.309037  | -1.119017 |
| C  | 2.807250  | 0.787869  | 0.054947  |
| C  | 3.447408  | 0.724122  | 1.322751  |
| C  | 2.459287  | 3.542514  | -0.253260 |



|   |           |           |           |
|---|-----------|-----------|-----------|
| C | 5.422912  | -0.229680 | 0.231366  |
| C | 4.763940  | 0.221504  | 1.384876  |
| C | 4.761321  | -0.195052 | -1.007119 |
| C | 2.731126  | 0.328072  | -2.447694 |
| C | 2.723338  | 1.159555  | 2.576350  |
| C | -3.343743 | 0.492773  | 1.377782  |
| C | -2.769811 | 0.692677  | 0.093219  |
| C | -3.441132 | 0.274553  | -1.086721 |
| C | -4.718587 | -0.306805 | -0.959441 |
| C | -2.581263 | 0.867098  | 2.627916  |
| C | -2.520006 | 3.482898  | -0.124193 |
| C | -5.313471 | -0.483741 | 0.299186  |
| C | -4.623431 | -0.092394 | 1.456775  |
| C | -2.783346 | 0.425431  | -2.438532 |
| H | 3.097467  | 3.490617  | 0.656433  |
| H | 2.138693  | 4.594836  | -0.394882 |
| H | 3.112047  | 3.254655  | -1.107279 |
| H | -0.037657 | 4.302628  | -0.289154 |
| H | 6.451715  | -0.620350 | 0.298084  |
| H | 5.272561  | 0.177198  | 2.363505  |
| H | 5.270509  | -0.563671 | -1.914125 |
| H | 3.381551  | -0.063342 | -3.259147 |
| H | 2.402457  | 1.352036  | -2.732139 |
| H | 1.812468  | -0.300219 | -2.407481 |
| H | 3.357585  | 1.005371  | 3.475377  |
| H | 1.782189  | 0.581037  | 2.715789  |
| H | 2.426547  | 2.232005  | 2.547237  |
| H | -5.249565 | -0.632655 | -1.870192 |
| H | -1.623540 | 0.301699  | 2.696016  |
| H | -3.176965 | 0.645278  | 3.539436  |
| H | -2.306019 | 1.945169  | 2.653133  |
| H | -3.206133 | 3.204127  | -0.954505 |
| H | -2.235477 | 4.548591  | -0.243246 |
| H | -3.109731 | 3.379705  | 0.813825  |
| H | -6.314285 | -0.939140 | 0.378879  |
| H | -5.079698 | -0.248097 | 2.449595  |
| H | -3.448258 | 0.056800  | -3.248785 |
| H | -1.834354 | -0.155515 | -2.479870 |
| H | -2.518250 | 1.481981  | -2.665191 |

Optimized Geometry of 2'

|    |           |           |           |
|----|-----------|-----------|-----------|
| Cu | 0.027353  | 0.046155  | -0.032267 |
| O  | -0.711709 | -1.685574 | -0.187974 |
| N  | 0.608413  | -1.850160 | -0.107327 |
| C  | 2.434512  | -2.563190 | 1.303120  |
| C  | 2.934336  | -3.154371 | 2.472604  |
| C  | 0.147074  | -2.851236 | 2.144914  |
| C  | 2.051147  | -3.597563 | 3.475241  |
| C  | 0.659059  | -3.447381 | 3.304237  |
| C  | 1.038717  | -2.400290 | 1.141178  |
| N  | -1.459568 | 1.261783  | -0.009512 |
| C  | -1.290719 | 2.585282  | -0.103346 |
| C  | -0.020709 | 3.206311  | -0.188511 |
| C  | 1.262266  | 2.613258  | -0.149355 |
| N  | 1.475187  | 1.292181  | -0.036864 |
| C  | 3.451788  | 0.305705  | -1.119996 |
| C  | 2.809245  | 0.785292  | 0.053757  |
| C  | 3.449334  | 0.721759  | 1.321607  |

|   |           |           |           |
|---|-----------|-----------|-----------|
| C | 5.424444  | -0.233363 | 0.230663  |
| C | 4.765639  | 0.218574  | 1.383973  |
| C | 4.762908  | -0.198929 | -1.007856 |
| C | -3.341922 | 0.493484  | 1.376512  |
| C | -2.767858 | 0.692621  | 0.091888  |
| C | -3.439330 | 0.274331  | -1.087908 |
| C | -4.717050 | -0.306402 | -0.960438 |
| C | -5.312054 | -0.482571 | 0.298240  |
| C | -4.621875 | -0.091077 | 1.455696  |
| H | -0.935766 | -2.731764 | 1.984510  |
| H | -0.031400 | -3.807499 | 4.085926  |
| H | 2.446454  | -4.070922 | 4.389802  |
| H | 4.022940  | -3.278518 | 2.600232  |
| H | 3.106106  | -2.226895 | 0.497163  |
| H | -0.033240 | 4.304544  | -0.284970 |
| H | 6.452663  | -0.624435 | 0.297691  |
| H | 5.281268  | 0.178650  | 2.359366  |
| H | 5.277888  | -0.565708 | -1.912485 |
| H | -5.255049 | -0.628860 | -1.868457 |
| H | -6.312182 | -0.938551 | 0.378153  |
| H | -5.085987 | -0.242053 | 2.445869  |
| H | -2.198193 | 3.220454  | -0.113594 |
| H | 2.152899  | 3.269414  | -0.197352 |
| H | 2.921383  | 0.337852  | -2.083985 |
| H | 2.918910  | 1.073030  | 2.219880  |
| H | -2.786943 | 0.801830  | 2.275938  |
| H | -2.957230 | 0.410237  | -2.068056 |

Optimized Geometry of 3

|    |           |           |           |
|----|-----------|-----------|-----------|
| Cu | 0.021395  | -0.027410 | -0.079640 |
| N  | 1.508419  | -1.240494 | 0.131983  |
| N  | -1.412515 | -1.309677 | -0.246500 |
| C  | 0.083302  | -3.208469 | 0.018002  |
| H  | 0.103428  | -4.306956 | 0.061360  |
| C  | -2.750472 | -0.837641 | -0.425928 |
| N  | 0.658195  | 1.871357  | -0.139843 |
| C  | 1.330701  | -2.569933 | 0.193836  |
| N  | -0.687538 | 1.845976  | -0.091584 |
| C  | -3.179109 | -0.450820 | -1.725438 |
| C  | 2.834579  | -0.713540 | 0.226224  |
| C  | 3.658170  | -0.675003 | -0.932925 |
| C  | 3.144445  | -1.156022 | -2.272327 |
| H  | 3.817137  | -0.827568 | -3.092266 |
| H  | 3.066718  | -2.267116 | -2.323040 |
| H  | 2.124371  | -0.764887 | -2.482010 |
| C  | 2.530386  | -3.460760 | 0.474962  |
| H  | 3.046340  | -3.149060 | 1.409768  |
| H  | 2.221301  | -4.520448 | 0.580589  |
| H  | 3.290937  | -3.397805 | -0.334465 |
| F  | 5.212256  | 3.061393  | -1.767186 |
| C  | 3.297246  | -0.218075 | 1.475720  |
| C  | 1.150627  | 2.149636  | -1.445541 |
| C  | -0.397314 | 2.521488  | 2.301801  |
| H  | 0.696058  | 2.485545  | 2.202630  |
| C  | 2.549595  | 2.315110  | -1.573206 |
| H  | 3.186665  | 2.174437  | -0.688465 |
| C  | 5.444068  | 0.313753  | 0.422170  |
| H  | 6.466000  | 0.719642  | 0.496865  |

|   |           |           |           |
|---|-----------|-----------|-----------|
| C | -2.609747 | 2.295093  | 1.285193  |
| H | -3.223798 | 2.080181  | 0.399197  |
| C | -0.996964 | 2.943972  | 3.494222  |
| C | 4.969114  | -0.170428 | -0.805623 |
| H | 5.616777  | -0.136947 | -1.696706 |
| C | -1.204321 | 2.177276  | 1.189874  |
| C | -3.195452 | 2.734175  | 2.483769  |
| C | 3.096681  | 2.706605  | -2.805234 |
| C | -1.185013 | -2.632034 | -0.215629 |
| C | 2.410087  | -0.267642 | 2.696612  |
| H | 2.877749  | 0.258102  | 3.555761  |
| H | 1.420837  | 0.202677  | 2.500128  |
| H | 2.194305  | -1.313871 | 3.010291  |
| C | -2.397313 | 3.055863  | 3.595659  |
| H | -2.859559 | 3.421647  | 4.524766  |
| C | 2.268593  | 2.927280  | -3.922643 |
| H | 2.700382  | 3.253247  | -4.880249 |
| C | -2.244724 | -0.562241 | -2.906557 |
| H | -1.962880 | -1.618958 | -3.114771 |
| H | -2.704773 | -0.143654 | -3.826284 |
| H | -1.288674 | -0.020915 | -2.726147 |
| C | 0.315248  | 2.397440  | -2.559664 |
| H | -0.774284 | 2.330129  | -2.435197 |
| C | -2.345093 | -3.584566 | -0.457656 |
| H | -2.830924 | -3.375758 | -1.436504 |
| H | -2.000410 | -4.638681 | -0.456091 |
| H | -3.139947 | -3.474058 | 0.312162  |
| F | 5.169723  | 1.820403  | -3.565818 |
| F | -0.306883 | 2.356661  | 5.683426  |
| C | -3.618862 | -0.742720 | 0.696274  |
| C | -3.145134 | -1.114901 | 2.084068  |
| H | -3.852715 | -0.743798 | 2.854720  |
| H | -3.048626 | -2.217555 | 2.216664  |
| H | -2.140855 | -0.688281 | 2.300565  |
| F | -0.502003 | 4.481511  | 5.234622  |
| C | 4.592570  | 2.895424  | -2.956518 |
| C | -4.936916 | -0.286956 | 0.484715  |
| H | -5.619711 | -0.208593 | 1.346342  |
| F | 1.170168  | 3.338656  | 4.408239  |
| C | -5.377101 | 0.092939  | -0.791823 |
| H | -6.406321 | 0.461680  | -0.933235 |
| C | -4.498321 | 0.018949  | -1.884345 |
| H | -4.840786 | 0.323272  | -2.888281 |
| C | -0.150023 | 3.284144  | 4.703450  |
| C | 4.606839  | 0.298432  | 1.549282  |
| H | 4.975504  | 0.686411  | 2.514422  |
| F | 0.495212  | 3.808306  | -5.896903 |
| F | -5.049385 | 3.931338  | 3.359444  |
| F | -5.296239 | 3.007565  | 1.394703  |
| F | -5.251379 | 1.767520  | 3.193036  |
| C | -0.032503 | 2.956802  | -4.985638 |
| C | 0.877556  | 2.766425  | -3.789232 |
| C | -4.700245 | 2.865243  | 2.599054  |
| F | -1.244323 | 3.441946  | -4.622311 |
| F | -0.254183 | 1.775959  | -5.623308 |
| F | 4.883014  | 3.974233  | -3.724458 |

#### Optimized Geometry of 3'

|    |           |           |           |
|----|-----------|-----------|-----------|
| Cu | 0.022829  | -0.026031 | -0.079045 |
| N  | 1.510363  | -1.238431 | 0.132920  |
| N  | -1.410526 | -1.308949 | -0.245667 |
| C  | 0.086091  | -3.207041 | 0.019335  |
| C  | -2.748677 | -0.837526 | -0.425260 |
| N  | 0.658820  | 1.872994  | -0.139660 |
| C  | 1.333210  | -2.567931 | 0.195072  |
| N  | -0.686904 | 1.847049  | -0.091450 |
| C  | -3.177426 | -0.451189 | -1.724876 |
| C  | 2.836293  | -0.710889 | 0.227094  |
| C  | 3.659916  | -0.672268 | -0.932030 |
| F  | 5.212440  | 3.064599  | -1.767090 |
| C  | 3.298697  | -0.214938 | 1.476494  |
| C  | 1.151187  | 2.151181  | -1.445402 |
| C  | -0.397067 | 2.523238  | 2.301790  |
| C  | 2.550090  | 2.317224  | -1.573048 |
| C  | 5.445335  | 0.317564  | 0.422910  |
| C  | -2.609361 | 2.295663  | 1.285144  |
| C  | -0.996946 | 2.945741  | 3.494089  |
| C  | 4.970639  | -0.167103 | -0.804791 |
| C  | -1.203881 | 2.178424  | 1.189910  |
| C  | -3.195303 | 2.734771  | 2.483594  |
| C  | 3.097059  | 2.708668  | -2.805143 |
| C  | -1.182460 | -2.631202 | -0.214482 |
| C  | -2.397347 | 3.057057  | 3.595443  |
| C  | 2.268923  | 2.928731  | -3.922637 |
| C  | 0.315749  | 2.398371  | -2.559616 |
| F  | 5.170511  | 1.823176  | -3.565437 |
| F  | -0.306705 | 2.359230  | 5.683457  |
| C  | -3.617154 | -0.742717 | 0.696885  |
| F  | -0.502714 | 4.483893  | 5.234154  |
| C  | 4.592874  | 2.898091  | -2.956410 |
| C  | -4.935394 | -0.287565 | 0.485166  |
| F  | 1.169979  | 3.341562  | 4.408104  |
| C  | -5.375688 | 0.091847  | -0.791477 |
| C  | -4.496832 | 0.017980  | -1.883946 |
| C  | -0.150201 | 3.286554  | 4.703273  |
| C  | 4.608066  | 0.302146  | 1.549991  |
| F  | 0.495247  | 3.808543  | -5.897174 |
| F  | -5.049783 | 3.931344  | 3.358916  |
| F  | -5.296162 | 3.007012  | 1.394379  |
| F  | -5.250846 | 1.767402  | 3.193000  |
| C  | -0.032141 | 2.957024  | -4.985734 |
| C  | 0.877950  | 2.767313  | -3.789247 |
| C  | -4.700157 | 2.865223  | 2.598787  |
| F  | -1.244183 | 3.441735  | -4.622569 |
| F  | -0.253291 | 1.775940  | -5.623140 |
| F  | 4.882889  | 3.976847  | -3.724587 |
| H  | 0.107094  | -4.308523 | 0.061910  |
| H  | 0.696774  | 2.472692  | 2.207448  |
| H  | 3.186885  | 2.178431  | -0.687970 |
| H  | 6.467236  | 0.722536  | 0.497497  |
| H  | -3.223154 | 2.081757  | 0.398896  |
| H  | 5.624241  | -0.138953 | -1.692141 |
| H  | -2.860067 | 3.422445  | 4.524478  |
| H  | 2.700711  | 3.254645  | -4.880269 |
| H  | -0.773967 | 2.315777  | -2.439422 |

|   |           |           |           |
|---|-----------|-----------|-----------|
| H | -5.623127 | -0.214348 | 1.343621  |
| H | -6.405045 | 0.459030  | -0.932840 |
| H | -4.844878 | 0.320853  | -2.886474 |
| H | 4.981822  | 0.688645  | 2.513707  |
| H | 2.231855  | -3.192472 | 0.363120  |
| H | -2.480166 | -0.524120 | -2.574003 |
| H | 3.274210  | -1.050617 | -1.891076 |
| H | 2.635492  | -0.243500 | 2.354968  |
| H | -2.053776 | -3.300218 | -0.352986 |
| H | -3.258498 | -1.037735 | 1.694993  |

|   |           |           |           |
|---|-----------|-----------|-----------|
| H | -2.139767 | 4.607048  | -0.585991 |
| H | -3.060722 | 3.306999  | -1.426679 |
| C | 5.321384  | -0.483834 | 0.106084  |
| H | 6.316127  | -0.953275 | 0.178931  |
| C | -2.567363 | 0.510220  | -2.866004 |
| H | -3.117686 | 0.098691  | -3.739185 |
| H | -2.305925 | 1.568025  | -3.092920 |
| H | -1.596482 | -0.029292 | -2.779701 |
| C | 2.881400  | 0.661644  | -2.625366 |
| H | 3.531956  | 0.277706  | -3.440183 |
| H | 1.879881  | 0.184719  | -2.723658 |
| H | 2.717401  | 1.748323  | -2.802594 |
| C | 2.553771  | 0.762708  | 2.453949  |
| H | 1.555160  | 0.269095  | 2.449870  |
| H | 3.102634  | 0.432162  | 3.361842  |
| H | 2.350988  | 1.852597  | 2.554821  |
| H | -1.319106 | -2.070006 | -0.978724 |
| H | 1.093789  | -1.892783 | -1.393660 |
| H | 1.472813  | -2.019175 | 0.413365  |

Optimized Geometry of 4

|    |           |           |           |
|----|-----------|-----------|-----------|
| Cu | -0.029722 | 0.020047  | -0.203082 |
| N  | 1.464571  | 1.266667  | -0.172675 |
| N  | -1.498417 | 1.289273  | -0.297319 |
| C  | -0.646732 | -1.964136 | -0.114832 |
| C  | 0.722800  | -1.831649 | -0.363519 |
| C  | -4.693705 | -0.132625 | -1.628491 |
| H  | -5.123127 | -0.445959 | -2.595976 |
| C  | -2.500225 | -3.116719 | 3.610006  |
| H  | -2.979597 | -3.429198 | 4.552725  |
| C  | -2.837354 | 0.792268  | -0.349331 |
| C  | -4.899035 | 0.146306  | 0.772824  |
| H  | -5.487839 | 0.047720  | 1.701224  |
| C  | -1.280066 | 2.611420  | -0.368179 |
| C  | -1.256843 | -2.323340 | 1.180280  |
| C  | 2.780742  | 0.722264  | -0.081235 |
| C  | 1.278867  | 2.593163  | -0.220900 |
| C  | -3.587227 | 0.657779  | 0.851259  |
| C  | 4.759221  | -0.211910 | -1.150966 |
| H  | 5.313579  | -0.472312 | -2.069175 |
| C  | 4.605526  | -0.161706 | 1.269607  |
| H  | 5.038443  | -0.381879 | 2.260780  |
| C  | -2.636742 | -2.638284 | 1.225558  |
| H  | -3.232481 | -2.570382 | 0.300507  |
| C  | -3.250496 | -3.033710 | 2.424479  |
| H  | -4.325494 | -3.279241 | 2.430452  |
| C  | -1.128379 | -2.800051 | 3.583374  |
| H  | -0.529672 | -2.863843 | 4.507967  |
| C  | -3.382562 | 0.385580  | -1.598860 |
| C  | -2.976240 | 1.029345  | 2.182467  |
| H  | -3.695881 | 0.861942  | 3.012155  |
| H  | -2.068599 | 0.416814  | 2.385988  |
| H  | -2.649388 | 2.092454  | 2.218290  |
| C  | 0.005666  | 3.204808  | -0.319924 |
| H  | 0.016832  | 4.303734  | -0.374609 |
| C  | -5.455912 | -0.244883 | -0.454608 |
| H  | -6.482639 | -0.644412 | -0.496365 |
| C  | -0.513707 | -2.409116 | 2.385342  |
| H  | 0.562778  | -2.172828 | 2.385778  |
| C  | 3.332049  | 0.439272  | 1.199343  |
| C  | 2.491689  | 3.510035  | -0.171839 |
| H  | 3.193070  | 3.300527  | -1.010036 |
| H  | 2.192456  | 4.577239  | -0.224722 |
| H  | 3.074056  | 3.357138  | 0.764192  |
| C  | 3.489260  | 0.388875  | -1.268540 |
| C  | -2.468425 | 3.549800  | -0.516129 |
| H  | -3.171177 | 3.457738  | 0.341828  |

Optimized Geometry of 4'

|    |           |           |           |
|----|-----------|-----------|-----------|
| Cu | -0.029536 | 0.019226  | -0.203196 |
| N  | 1.464802  | 1.265795  | -0.172898 |
| N  | -1.498182 | 1.288495  | -0.297615 |
| C  | -0.646621 | -1.964924 | -0.114730 |
| C  | 0.722922  | -1.832516 | -0.363400 |
| C  | -4.693490 | -0.133441 | -1.628699 |
| C  | -2.500245 | -3.117007 | 3.610197  |
| C  | -2.837136 | 0.791533  | -0.349602 |
| C  | -4.898868 | 0.145777  | 0.772579  |
| C  | -1.279781 | 2.610625  | -0.368624 |
| C  | -1.256776 | -2.323955 | 1.180409  |
| C  | 2.780951  | 0.721354  | -0.081363 |
| C  | 1.279148  | 2.592292  | -0.221281 |
| C  | -3.587043 | 0.657211  | 0.850986  |
| C  | 4.759421  | -0.213017 | -1.150938 |
| C  | 4.605670  | -0.162526 | 1.269626  |
| C  | -2.636688 | -2.638844 | 1.225691  |
| C  | -3.250485 | -3.034108 | 2.424643  |
| C  | -1.128387 | -2.800392 | 3.583562  |
| C  | -3.382329 | 0.384720  | -1.599096 |
| C  | 0.005972  | 3.203972  | -0.320407 |
| C  | -5.455730 | -0.245534 | -0.454821 |
| C  | -0.513672 | -2.409619 | 2.385499  |
| C  | 3.332217  | 0.438490  | 1.199261  |
| C  | 3.489485  | 0.387801  | -1.268612 |
| C  | 5.321544  | -0.484815 | 0.106157  |
| H  | -5.128808 | -0.444810 | -2.594290 |
| H  | -2.979933 | -3.429028 | 4.552966  |
| H  | -5.493844 | 0.049210  | 1.697530  |
| H  | 5.320330  | -0.471432 | -2.065978 |
| H  | 5.045525  | -0.380549 | 2.258484  |
| H  | -3.231869 | -2.572402 | 0.300108  |
| H  | -4.325433 | -3.280412 | 2.431016  |
| H  | -0.529975 | -2.862765 | 4.508479  |
| H  | 0.016652  | 4.305863  | -0.373127 |
| H  | -6.481782 | -0.645932 | -0.496341 |
| H  | 0.561159  | -2.165632 | 2.387253  |

|   |           |           |           |
|---|-----------|-----------|-----------|
| H | 6.315527  | -0.955139 | 0.179025  |
| H | -1.319700 | -2.061338 | -0.979794 |
| H | 1.095698  | -1.877631 | -1.393934 |
| H | 1.472687  | -2.017147 | 0.414557  |
| H | -2.161872 | 3.275660  | -0.459954 |
| H | 2.176299  | 3.242765  | -0.189894 |
| H | -3.137747 | 0.956651  | 1.809975  |
| H | -2.777994 | 0.487758  | -2.514177 |
| H | 2.758992  | 0.693484  | 2.104240  |
| H | 3.037675  | 0.602940  | -2.249527 |

|   |           |           |           |
|---|-----------|-----------|-----------|
| H | -1.342914 | -0.604395 | 2.909448  |
| H | 3.006967  | -0.045353 | -3.620376 |
| H | 2.161577  | -1.494770 | -2.972922 |
| H | 1.534072  | 0.130062  | -2.601931 |
| H | -4.840556 | -0.230213 | 2.965679  |
| H | -3.434712 | 6.964618  | 1.175938  |
| H | -3.664256 | -0.313178 | -2.850787 |
| H | -1.999707 | -0.062942 | -2.210304 |
| H | -2.638546 | -1.716174 | -2.388169 |
| H | 5.521904  | -0.050626 | 1.754066  |
| H | -6.278601 | 0.426002  | 1.018816  |
| H | 5.024002  | 0.530032  | -2.518506 |
| H | 6.432927  | 0.714807  | -0.453142 |
| H | 2.760955  | -2.200708 | 2.296911  |
| H | 3.791669  | -0.957958 | 3.091726  |
| H | 2.136306  | -0.546901 | 2.515322  |
| H | -0.933637 | 7.122872  | 0.966112  |
| H | -4.552899 | 4.714229  | 1.059150  |

Optimized Geometry of 5

|    |           |           |           |
|----|-----------|-----------|-----------|
| Cu | 0.072421  | -0.141949 | 0.160764  |
| O  | 1.317900  | 1.434887  | 0.314701  |
| O  | -1.194234 | 1.386629  | 0.370112  |
| N  | 1.535757  | -1.397942 | -0.169582 |
| N  | -1.359397 | -1.484022 | 0.189465  |
| N  | 0.760113  | 2.588122  | 0.477632  |
| C  | -1.157681 | -2.793617 | 0.003751  |
| N  | -0.538113 | 2.529124  | 0.499174  |
| C  | -0.655302 | 4.988041  | 0.737584  |
| C  | -2.681151 | -0.990274 | 0.408520  |
| C  | -2.696698 | 3.627693  | 0.788237  |
| C  | 0.112208  | -3.366776 | -0.231364 |
| C  | -3.158787 | -0.846785 | 1.739652  |
| C  | -4.765123 | -0.087172 | -0.460334 |
| C  | -1.298234 | 3.734193  | 0.677159  |
| C  | 1.365260  | -2.718156 | -0.309258 |
| C  | -3.471941 | -0.590647 | -0.703222 |
| C  | -2.350519 | -3.735605 | 0.049071  |
| C  | 2.584090  | -3.590780 | -0.566514 |
| C  | 2.849045  | -0.840871 | -0.246533 |
| C  | -2.278838 | -1.207463 | 2.913503  |
| C  | -1.432125 | 6.140317  | 0.917726  |
| C  | 2.473340  | -0.453385 | -2.735503 |
| C  | -4.458295 | -0.338833 | 1.935929  |
| C  | -3.456766 | 4.795316  | 0.967851  |
| C  | -2.832750 | 6.051922  | 1.034156  |
| C  | -2.922624 | -0.677603 | -2.107885 |
| C  | 3.622162  | -0.709588 | 0.938903  |
| C  | 3.337198  | -0.377774 | -1.498249 |
| C  | 4.912283  | -0.153201 | 0.839764  |
| C  | -5.262674 | 0.033039  | 0.847109  |
| C  | 4.633023  | 0.172366  | -1.550430 |
| C  | 5.421738  | 0.279422  | -0.394334 |
| C  | 3.056105  | -1.127718 | 2.276106  |
| H  | 0.438158  | 5.050384  | 0.641301  |
| H  | -3.170390 | 2.636863  | 0.735525  |
| H  | 0.127401  | -4.456744 | -0.373422 |
| H  | -5.388824 | 0.220924  | -1.317108 |
| H  | -3.105856 | -3.468690 | -0.722707 |
| H  | -2.036316 | -4.786751 | -0.115599 |
| H  | -2.872725 | -3.674149 | 1.029305  |
| H  | 3.319001  | -3.511059 | 0.265371  |
| H  | 2.296298  | -4.655915 | -0.680841 |
| H  | 3.122025  | -3.269233 | -1.485612 |
| H  | -2.802807 | -1.025605 | 3.876513  |
| H  | -1.960740 | -2.273683 | 2.892321  |

Optimized Geometry of 5'

|    |           |           |           |
|----|-----------|-----------|-----------|
| Cu | 0.071061  | -0.141349 | 0.161090  |
| O  | 1.317022  | 1.435123  | 0.314863  |
| O  | -1.195123 | 1.387622  | 0.370411  |
| N  | 1.534003  | -1.397802 | -0.169256 |
| N  | -1.361158 | -1.482990 | 0.189951  |
| N  | 0.759590  | 2.588535  | 0.477752  |
| C  | -1.159845 | -2.792657 | 0.004307  |
| N  | -0.538653 | 2.529928  | 0.499367  |
| C  | -0.655091 | 4.988895  | 0.737631  |
| C  | -2.682752 | -0.988832 | 0.409045  |
| C  | -2.696892 | 3.629163  | 0.788477  |
| C  | 0.109859  | -3.366212 | -0.230840 |
| C  | -3.160274 | -0.845117 | 1.740194  |
| C  | -4.766499 | -0.085158 | -0.459753 |
| C  | -1.298402 | 3.735236  | 0.677318  |
| C  | 1.363102  | -2.717973 | -0.308841 |
| C  | -3.473481 | -0.589036 | -0.702679 |
| C  | 2.847454  | -0.841130 | -0.246312 |
| C  | -1.431558 | 6.141415  | 0.917742  |
| C  | -4.459619 | -0.336763 | 1.936509  |
| C  | -3.456600 | 4.797025  | 0.968059  |
| C  | -2.832203 | 6.053448  | 1.034253  |
| C  | 3.620673  | -0.710005 | 0.939075  |
| C  | 3.335679  | -0.378257 | -1.498083 |
| C  | 4.910956  | -0.154012 | 0.839832  |
| C  | -5.263944 | 0.035283  | 0.847709  |
| C  | 4.631666  | 0.171491  | -1.550367 |
| C  | 5.420475  | 0.278382  | -0.394320 |
| H  | 0.438374  | 5.051144  | 0.640994  |
| H  | -3.170599 | 2.638498  | 0.735467  |
| H  | 0.125276  | -4.459126 | -0.372175 |
| H  | -5.396699 | 0.218219  | -1.313651 |
| H  | -4.848966 | -0.231627 | 2.964203  |
| H  | -3.433866 | 6.966353  | 1.176054  |
| H  | 5.527850  | -0.056113 | 1.750050  |
| H  | -6.279406 | 0.428537  | 1.019390  |
| H  | 5.029449  | 0.524635  | -2.517399 |
| H  | 6.431636  | 0.713045  | -0.453266 |

|   |           |           |           |
|---|-----------|-----------|-----------|
| H | -0.932731 | 7.123805  | 0.965883  |
| H | -4.552810 | 4.716449  | 1.059261  |
| H | -2.046451 | -3.456141 | 0.035846  |
| H | -2.515085 | -1.134233 | 2.583713  |
| H | 2.266994  | -3.330299 | -0.495269 |
| H | -3.067321 | -0.681364 | -1.721815 |
| H | 3.205526  | -1.047986 | 1.900762  |
| H | 2.703611  | -0.463673 | -2.395612 |

Optimized Geometry of 6

|    |           |           |           |
|----|-----------|-----------|-----------|
| Cu | -0.150770 | -0.000089 | -0.037391 |
| O  | 0.490527  | 0.680270  | -1.654170 |
| O  | 0.490483  | -0.680532 | -1.654152 |
| N  | -0.934009 | 1.422647  | 1.028825  |
| N  | 1.749768  | -0.000090 | 1.408544  |
| N  | -0.934089 | -1.422768 | 1.028834  |
| N  | -0.797181 | 1.277734  | 2.381156  |
| N  | 1.340508  | -0.000112 | 2.714710  |
| N  | -0.797252 | -1.277867 | 2.381161  |
| C  | -2.454992 | 2.103896  | -1.462185 |
| C  | -0.438028 | 3.653076  | -1.271419 |
| C  | -2.698986 | 4.394329  | -0.482469 |
| C  | -1.752948 | 3.180166  | -0.604586 |
| C  | -1.445344 | 2.650390  | 0.783628  |
| C  | -1.610457 | 3.314346  | 2.017336  |
| C  | -1.175081 | 2.423605  | 3.005197  |
| C  | -1.110348 | 2.613728  | 4.499396  |
| C  | -0.890495 | 4.096139  | 4.849607  |
| C  | -2.386356 | 2.075308  | 5.176942  |
| C  | 3.631948  | 1.266352  | -0.655901 |
| C  | 5.437932  | 0.000062  | 0.546335  |
| C  | 3.942692  | 0.000002  | 0.172667  |
| C  | 3.098728  | -0.000040 | 1.434611  |
| C  | 3.554953  | 0.000005  | 2.775400  |
| C  | 2.403284  | -0.000072 | 3.567363  |
| C  | 2.287664  | -0.000038 | 5.070252  |
| C  | 2.925812  | 1.272504  | 5.663811  |
| B  | -0.166537 | -0.000085 | 3.002162  |
| C  | 3.632055  | -1.266356 | -0.655927 |
| C  | 2.926603  | -1.272115 | 5.663950  |
| C  | -1.445510 | -2.650468 | 0.783628  |
| C  | -1.175247 | -2.423711 | 3.005198  |
| C  | -1.753118 | -3.180192 | -0.604606 |
| C  | -1.610664 | -3.314425 | 2.017331  |
| C  | -1.110578 | -2.613837 | 4.499400  |
| C  | -2.455360 | -2.103952 | -1.462077 |
| C  | -0.438160 | -3.652819 | -1.271564 |
| C  | -2.698977 | -4.394504 | -0.482548 |
| C  | -0.890891 | -4.096268 | 4.849626  |
| C  | -2.386557 | -2.075283 | 5.176895  |
| H  | -1.796708 | 1.228635  | -1.646563 |
| H  | -3.387563 | 1.755347  | -0.963426 |
| H  | -2.722290 | 2.538893  | -2.452363 |
| H  | 0.315365  | 2.839365  | -1.313851 |
| H  | -0.645378 | 3.998872  | -2.310753 |
| H  | -0.002731 | 4.501575  | -0.695935 |
| H  | -2.942194 | 4.775994  | -1.500003 |
| H  | -3.648999 | 4.113988  | 0.027172  |

|   |           |           |           |
|---|-----------|-----------|-----------|
| H | -2.221718 | 5.222221  | 0.089058  |
| H | -2.000594 | 4.325044  | 2.170651  |
| H | -0.241573 | 2.032074  | 4.879884  |
| H | 0.029270  | 4.493902  | 4.364851  |
| H | -1.755392 | 4.712207  | 4.511456  |
| H | -0.795263 | 4.218831  | 5.952333  |
| H | -2.321143 | 2.192288  | 6.283387  |
| H | -3.278926 | 2.634648  | 4.814074  |
| H | -2.531898 | 0.998281  | 4.942835  |
| H | 4.243953  | 1.268346  | -1.588472 |
| H | 2.556587  | 1.296342  | -0.935924 |
| H | 3.877745  | 2.182453  | -0.070326 |
| H | 6.054255  | 0.000091  | -0.381697 |
| H | 5.703079  | 0.903626  | 1.141901  |
| H | 4.593761  | 0.000061  | 3.122967  |
| H | 1.209591  | -0.000350 | 5.336945  |
| H | 2.831020  | 1.278634  | 6.774839  |
| H | 2.437336  | 2.188117  | 5.259122  |
| H | 4.008858  | 1.320445  | 5.405563  |
| H | -0.403163 | -0.000075 | 4.195933  |
| H | 5.703152  | -0.903487 | 1.141893  |
| H | 4.244062  | -1.268280 | -1.588496 |
| H | 2.556698  | -1.296432 | -0.935952 |
| H | 3.877928  | -2.182447 | -0.070369 |
| H | 2.831817  | -1.278177 | 6.774978  |
| H | 2.438699  | -2.188078 | 5.259365  |
| H | 4.009679  | -1.319412 | 5.405711  |
| H | -2.000862 | -4.325100 | 2.170640  |
| H | -0.241760 | -2.032267 | 4.879917  |
| H | -1.797208 | -1.228585 | -1.646423 |
| H | -3.387950 | -1.755573 | -0.963234 |
| H | -2.722660 | -2.538911 | -2.452272 |
| H | 0.315078  | -2.838961 | -1.313991 |
| H | -0.645517 | -3.998579 | -2.310909 |
| H | -0.002665 | -4.501279 | -0.696171 |
| H | -2.942185 | -4.776109 | -1.500105 |
| H | -3.649004 | -4.114347 | 0.027169  |
| H | -2.221561 | -5.222381 | 0.088875  |
| H | 0.028844  | -4.494133 | 4.364898  |
| H | -1.755845 | -4.712247 | 4.511455  |
| H | -0.795704 | -4.218965 | 5.952355  |
| H | -2.321397 | -2.192258 | 6.283344  |
| H | -3.279169 | -2.634538 | 4.814000  |
| H | -2.531984 | -0.998244 | 4.942770  |

Optimized Geometry of 6'

|    |           |           |           |
|----|-----------|-----------|-----------|
| Cu | -0.001736 | -0.013285 | 0.007882  |
| O  | 1.675626  | 0.661739  | -0.460012 |
| O  | 1.672152  | -0.699055 | -0.456817 |
| N  | -1.320965 | 1.412829  | 0.024956  |
| N  | -0.004966 | -0.007628 | 2.395921  |
| N  | -1.328200 | -1.432569 | 0.031630  |
| N  | -2.315992 | 1.272618  | 0.951662  |
| N  | -1.292909 | -0.003304 | 2.859327  |
| N  | -2.322487 | -1.282968 | 0.957654  |
| C  | -1.431582 | 2.639537  | -0.533514 |
| C  | -2.512561 | 3.307673  | 0.079033  |
| C  | -3.038662 | 2.420493  | 1.025061  |

|   |           |           |           |
|---|-----------|-----------|-----------|
| C | 0.789592  | -0.007003 | 3.486357  |
| C | -0.002828 | -0.002181 | 4.660199  |
| C | -1.329840 | 0.000052  | 4.221361  |
| B | -2.432786 | -0.002830 | 1.832441  |
| C | -1.445057 | -2.661290 | -0.521105 |
| C | -3.050993 | -2.426794 | 1.036397  |
| C | -2.529407 | -3.321058 | 0.094548  |
| H | -2.871018 | 4.321082  | -0.143406 |
| H | 0.347604  | -0.000562 | 5.701101  |
| H | -3.519234 | 0.001323  | 2.406696  |
| H | -2.892927 | -4.333666 | -0.123274 |
| H | -0.725692 | 2.957095  | -1.309756 |
| H | -3.884259 | 2.497832  | 1.717464  |
| H | 1.880986  | -0.010026 | 3.366167  |
| H | -2.286705 | 0.003746  | 4.756899  |
| H | -0.740744 | -2.986078 | -1.295784 |
| H | -3.896980 | -2.496499 | 1.729138  |

|   |           |           |           |
|---|-----------|-----------|-----------|
| H | 1.203665  | 1.060275  | 3.235263  |
| H | 3.262698  | 0.077679  | 4.309730  |
| H | 1.769347  | -0.271026 | 5.252573  |
| H | 2.914283  | 0.992697  | 5.819521  |
| H | -0.069382 | 2.938070  | 4.327472  |
| H | 0.903772  | 2.733224  | 5.827344  |
| H | -0.177318 | 1.409400  | 5.272609  |
| H | 3.222506  | 3.371489  | 5.496329  |
| H | 4.737857  | 5.142167  | 4.638473  |
| H | 5.004253  | 5.489435  | 2.153108  |
| H | 3.719982  | 4.023874  | 0.562176  |
| H | -2.413748 | -0.625583 | 0.294711  |
| H | -1.921198 | -0.755688 | -1.496359 |
| H | -0.297505 | -2.502169 | -1.011382 |
| H | 0.664899  | -4.227071 | 0.268817  |
| H | 0.987779  | -5.466997 | 2.415065  |
| H | -0.114236 | -4.645546 | 4.523219  |
| H | -1.542263 | -2.576870 | 4.455826  |
| H | -1.862632 | -1.337098 | 2.326351  |

Optimized Geometry of 7<sup>+</sup>

|    |           |           |           |
|----|-----------|-----------|-----------|
| Cu | 0.097342  | -0.132293 | -0.097922 |
| C  | -1.687267 | -0.979427 | -0.447650 |
| C  | -0.778169 | -2.000187 | -0.156961 |
| N  | 2.036366  | 2.053671  | 1.190443  |
| N  | -0.025526 | 1.839577  | -0.045421 |
| N  | 2.040117  | -0.158077 | 0.216064  |
| C  | 0.832802  | 2.596972  | 0.687774  |
| C  | 0.513941  | 3.955552  | 0.963680  |
| C  | -0.638424 | 4.524174  | 0.421953  |
| C  | -1.479171 | 3.747617  | -0.396151 |
| C  | -1.132279 | 2.414785  | -0.587592 |
| C  | 2.711837  | 0.877171  | 0.785465  |
| C  | 4.111068  | 0.773184  | 1.011020  |
| C  | 4.797280  | -0.377596 | 0.623362  |
| C  | 4.094322  | -1.430355 | 0.010779  |
| C  | 2.724326  | -1.269031 | -0.166600 |
| C  | 2.760807  | 2.887514  | 2.146880  |
| C  | 2.590815  | 2.669005  | 3.534677  |
| C  | 1.666485  | 1.590652  | 4.096319  |
| C  | 2.451111  | 0.540650  | 4.913598  |
| C  | 0.517794  | 2.206434  | 4.925611  |
| C  | 3.325781  | 3.507674  | 4.406740  |
| C  | 4.182698  | 4.509380  | 3.926293  |
| C  | 4.333048  | 4.705676  | 2.540415  |
| C  | 3.618926  | 3.890260  | 1.651676  |
| C  | -0.612253 | -2.688976 | 1.139445  |
| C  | 0.187026  | -3.857606 | 1.192033  |
| C  | 0.364865  | -4.557024 | 2.397179  |
| C  | -0.252411 | -4.099271 | 3.575253  |
| C  | -1.051739 | -2.939122 | 3.536854  |
| C  | -1.231215 | -2.240657 | 2.333875  |
| H  | 1.175490  | 4.569136  | 1.585560  |
| H  | -0.871717 | 5.580048  | 0.633375  |
| H  | -2.390472 | 4.155980  | -0.857480 |
| H  | -1.763455 | 1.746285  | -1.190974 |
| H  | 4.662330  | 1.599715  | 1.473968  |
| H  | 5.883824  | -0.444631 | 0.793005  |
| H  | 4.590560  | -2.356298 | -0.315541 |
| H  | 2.119340  | -2.059488 | -0.633343 |

Optimized Geometry of 8

|    |           |           |           |
|----|-----------|-----------|-----------|
| Cu | -0.053611 | 0.067911  | -0.135470 |
| N  | 1.435421  | 1.305839  | -0.162265 |
| N  | -1.527161 | 1.333364  | -0.300228 |
| N  | -0.483586 | -1.915930 | -0.079994 |
| C  | 0.840571  | -1.720037 | -0.108356 |
| C  | -4.761530 | -0.178753 | -1.412400 |
| C  | -2.483292 | -3.530333 | 3.310945  |
| C  | -2.877217 | 0.864065  | -0.279172 |
| C  | -4.943352 | 0.427503  | 0.931080  |
| C  | -1.300057 | 2.643060  | -0.480494 |
| C  | -1.102545 | -2.426819 | 1.090716  |
| C  | 2.755522  | 0.773198  | -0.034006 |
| C  | 1.253657  | 2.627910  | -0.301271 |
| C  | -3.618348 | 0.910570  | 0.933522  |
| C  | 4.754454  | -0.178748 | -1.046648 |
| C  | 4.578654  | -0.025393 | 1.368700  |
| C  | -2.507889 | -2.297658 | 1.206478  |
| C  | -3.185671 | -2.833017 | 2.310401  |
| C  | -1.092432 | -3.697024 | 3.185263  |
| C  | -3.437660 | 0.303332  | -1.458871 |
| C  | -2.982896 | 1.424611  | 2.205725  |
| C  | -0.012302 | 3.234529  | -0.467288 |
| C  | -5.517971 | -0.110456 | -0.231145 |
| C  | -0.404842 | -3.156264 | 2.087830  |
| C  | 3.297098  | 0.552106  | 1.262413  |
| C  | 2.468785  | 3.542179  | -0.282975 |
| C  | 3.476981  | 0.398653  | -1.200833 |
| C  | -2.478533 | 3.572682  | -0.729425 |
| C  | 5.309077  | -0.386442 | 0.225574  |
| C  | -2.617034 | 0.208829  | -2.724188 |
| C  | 2.881581  | 0.609535  | -2.574498 |
| C  | 2.499764  | 0.910734  | 2.495046  |
| H  | -5.203727 | -0.614282 | -2.325142 |
| H  | -3.019107 | -3.960298 | 4.173742  |
| H  | -5.527156 | 0.466437  | 1.867159  |
| H  | 5.320330  | -0.471483 | -1.947842 |
| H  | 5.006371  | -0.195913 | 2.371809  |

|   |           |           |           |
|---|-----------|-----------|-----------|
| H | -3.057968 | -1.777122 | 0.408135  |
| H | -4.280116 | -2.712223 | 2.381674  |
| H | -0.533258 | -4.267697 | 3.946825  |
| H | -3.687157 | 1.347186  | 3.061750  |
| H | -2.069032 | 0.839653  | 2.456838  |
| H | -2.658711 | 2.486311  | 2.124392  |
| H | 0.005226  | 4.324726  | -0.610800 |
| H | -6.553791 | -0.487611 | -0.214653 |
| H | 0.677703  | -3.336867 | 1.991114  |
| H | 3.192038  | 3.277852  | -1.085784 |
| H | 2.173619  | 4.603676  | -0.413643 |
| H | 3.023898  | 3.450323  | 0.677147  |
| H | -3.186650 | 3.582573  | 0.128694  |
| H | -2.137353 | 4.612244  | -0.910601 |
| H | -3.069037 | 3.238198  | -1.611446 |
| H | 6.310041  | -0.837044 | 0.326858  |
| H | -3.206283 | -0.243182 | -3.550849 |
| H | -2.251755 | 1.203517  | -3.063179 |
| H | -1.711903 | -0.419705 | -2.560411 |
| H | 3.527903  | 0.168122  | -3.362938 |
| H | 1.869568  | 0.152321  | -2.656143 |
| H | 2.744382  | 1.688561  | -2.811595 |
| H | 1.527889  | 0.366193  | 2.519854  |
| H | 3.060406  | 0.660793  | 3.421322  |
| H | 2.242391  | 1.992885  | 2.530479  |
| H | 1.332299  | -1.716558 | -1.093512 |
| H | 1.498582  | -1.879719 | 0.764615  |

|   |           |           |           |
|---|-----------|-----------|-----------|
| C | -2.595371 | 0.901225  | -3.061413 |
| C | 2.810390  | 0.338101  | -2.232983 |
| C | 2.147323  | 1.091816  | 2.757351  |
| H | -5.129965 | -0.140322 | -2.973202 |
| H | -0.667990 | -4.084152 | 4.600352  |
| H | -5.703342 | 0.057996  | 1.324859  |
| H | 5.129590  | -0.841284 | -1.364815 |
| H | 4.568151  | -0.187543 | 2.889642  |
| H | -2.712061 | -2.973242 | 0.921151  |
| H | -2.735217 | -4.091912 | 3.170291  |
| H | 1.420295  | -2.954742 | 3.767766  |
| H | -3.041369 | 2.201000  | 2.100295  |
| H | -3.989410 | 0.827150  | 2.770970  |
| H | -2.302162 | 0.586629  | 2.181663  |
| H | 0.004871  | 4.433274  | -0.378601 |
| H | -6.572007 | -0.526107 | -0.955794 |
| H | 1.433623  | -1.830264 | 1.520259  |
| H | 3.156642  | 3.221679  | -0.806248 |
| H | 2.186063  | 4.597154  | -0.162147 |
| H | 2.938311  | 3.397322  | 0.950351  |
| H | -2.148959 | 4.847850  | -0.645187 |
| H | -3.090477 | 3.601479  | -1.543446 |
| H | -3.254258 | 3.722368  | 0.224555  |
| H | 5.948546  | -1.082823 | 0.995125  |
| H | -3.075365 | 0.494604  | -3.977393 |
| H | -2.386933 | 1.980803  | -3.236644 |
| H | -1.597161 | 0.421282  | -2.941801 |
| H | 3.483679  | -0.181237 | -2.948359 |
| H | 1.788123  | -0.095041 | -2.333440 |
| H | 2.720330  | 1.400584  | -2.552265 |
| H | 1.123904  | 0.653307  | 2.728497  |
| H | 2.608724  | 0.839327  | 3.736545  |
| H | 2.005108  | 2.195338  | 2.721147  |
| H | -0.994396 | -1.959293 | -2.213415 |
| H | -1.206752 | -3.493727 | -1.121840 |

Optimized Geometry of [Me<sub>2</sub>NN]Cu( $\kappa^1$ -N-PhN=CH<sub>2</sub>)

|    |           |           |           |
|----|-----------|-----------|-----------|
| Cu | -0.252695 | 0.165524  | -0.157162 |
| N  | 1.280760  | 1.332886  | 0.007227  |
| N  | -1.658589 | 1.503002  | -0.395418 |
| N  | -0.601114 | -1.714717 | -0.200311 |
| C  | -0.955048 | -2.426984 | -1.223556 |
| C  | -4.756140 | 0.123739  | -1.968401 |
| C  | -0.656837 | -3.602103 | 3.609013  |
| C  | -2.986550 | 1.018989  | -0.547329 |
| C  | -5.075703 | 0.234537  | 0.433724  |
| C  | -1.380108 | 2.811458  | -0.430232 |
| C  | -0.629872 | -2.359884 | 1.084551  |
| C  | 2.545285  | 0.730401  | 0.266177  |
| C  | 1.164277  | 2.664744  | -0.106230 |
| C  | -3.791256 | 0.788105  | 0.604966  |
| C  | 4.531366  | -0.438444 | -0.529199 |
| C  | 4.217483  | -0.073251 | 1.848781  |
| C  | -1.802459 | -2.995897 | 1.543569  |
| C  | -1.812024 | -3.609769 | 2.807536  |
| C  | 0.509826  | -2.965115 | 3.145689  |
| C  | -3.464847 | 0.676636  | -1.844988 |
| C  | -3.261817 | 1.115935  | 1.982012  |
| C  | -0.067781 | 3.337505  | -0.307219 |
| C  | -5.563984 | -0.094212 | -0.841485 |
| C  | 0.525633  | -2.333052 | 1.892501  |
| C  | 2.991302  | 0.581344  | 1.611522  |
| C  | 2.420391  | 3.520824  | -0.026830 |
| C  | 3.312964  | 0.209261  | -0.814056 |
| C  | -2.520056 | 3.802690  | -0.609183 |
| C  | 4.990394  | -0.577151 | 0.790540  |

Optimized Geometry of **9**

|    |           |           |           |
|----|-----------|-----------|-----------|
| Cu | 0.064176  | 0.053543  | 0.209639  |
| F  | -1.174734 | -1.244791 | 0.387737  |
| F  | 1.353978  | -1.198687 | 0.353499  |
| N  | -1.389987 | 1.300159  | 0.067036  |
| C  | -1.244524 | 2.620668  | -0.081922 |
| C  | 0.000642  | 3.272000  | -0.165641 |
| C  | 1.270411  | 2.665906  | -0.120559 |
| N  | 1.467600  | 1.352222  | 0.028556  |
| C  | 3.406526  | 0.426494  | -1.161361 |
| C  | 2.792021  | 0.822932  | 0.058523  |
| C  | 3.471673  | 0.724776  | 1.304332  |
| C  | 2.482917  | 3.570299  | -0.258113 |
| C  | 5.445861  | -0.069814 | 0.096460  |
| C  | 4.808761  | 0.286173  | 1.296370  |
| C  | 4.744356  | -0.006751 | -1.118777 |
| C  | 2.625388  | 0.438748  | -2.452392 |
| C  | 2.760256  | 1.047378  | 2.595508  |
| C  | -3.340496 | 0.582844  | 1.379782  |
| C  | -2.693140 | 0.722014  | 0.120686  |
| C  | -3.320413 | 0.319947  | -1.090757 |
| C  | -4.640377 | -0.162548 | -1.024539 |

|   |           |           |           |   |           |           |           |
|---|-----------|-----------|-----------|---|-----------|-----------|-----------|
| C | -2.612179 | 0.915987  | 2.658517  | H | 3.442775  | 0.939828  | 3.465311  |
| C | -2.493023 | 3.481602  | -0.172739 | H | 1.899267  | 0.356864  | 2.742682  |
| C | -5.311300 | -0.267551 | 0.204982  | H | 2.347892  | 2.081146  | 2.608548  |
| C | -4.660474 | 0.095463  | 1.395335  | H | -5.144567 | -0.473282 | -1.955138 |
| C | -2.571915 | 0.381366  | -2.399575 | H | -1.721170 | 0.258656  | 2.774430  |
| H | 3.153599  | 3.480432  | 0.624557  | H | -3.268774 | 0.769302  | 3.542361  |
| H | 2.174136  | 4.630224  | -0.365959 | H | -2.241270 | 1.965257  | 2.676448  |
| H | 3.093511  | 3.285776  | -1.143594 | H | -3.123796 | 3.180091  | -1.038092 |
| H | -0.021130 | 4.362825  | -0.291786 | H | -2.226863 | 4.552901  | -0.282552 |
| H | 6.491892  | -0.417818 | 0.110485  | H | -3.126903 | 3.360279  | 0.732830  |
| H | 5.352497  | 0.210433  | 2.253267  | H | -6.343725 | -0.652795 | 0.237183  |
| H | 5.238325  | -0.313162 | -2.056312 | H | -5.179362 | -0.012722 | 2.362795  |
| H | 3.260889  | 0.125075  | -3.307605 | H | -3.215640 | 0.055752  | -3.244093 |
| H | 2.205440  | 1.442536  | -2.686310 | H | -1.680344 | -0.285245 | -2.366667 |
| H | 1.762107  | -0.262107 | -2.386332 | H | -2.196936 | 1.404062  | -2.627398 |

## SI 20. References.

- (1) Takeda, Y.; Okumura, S.; Minakata, S. *Angew. Chem. Int. Ed.* **2012**, *51*, 7804.
- (2) Young, M. J. T.; Platz, M. S. *J. Org. Chem.* **1991**, *56*, 6403.
- (3) Dai, X.; Warren, T. H. *Chem. Commun.* **2001**, 1998.
- (4) Wiese, S.; Kapoor, P.; Williams, K. D.; Warren, T. H. *J. Am. Chem. Soc.* **2009**, *131*, 18105.
- (5) Takeda, Y.; Okumura, S.; Minakata, S. *Angew. Chem. Int. Ed.* **2012**, *51*, 7804
- (6) George, G. N. EXAFSPAK, Stanford Synchrotron Radiation Laboratory; Stanford Linear Accelerator Center, Stanford University: Stanford, CA, 1996.
- (7) Tenderholt, A. PySpline, Stanford Synchrotron Radiation Laboratory; Stanford Linear Accelerator Center, Stanford University: Stanford, CA, 2005.
- (8) DuBois, J.; Mukherjee, P.; Stack, T.; Hedman, B.; Solomon, E.; Hodgson, K. *J. Am. Chem. Soc.* **2000**, *122*, 5775.
- (9) Neese, F. *WIREs Comput. Mol. Sci.* **2012**, *2*, 73.
- (10) Becke, A. D. *J. Chem. Phys.* **1993**, *98*, 5648.
- (11) Lee, C. T.; Yang, W. T.; Parr, R. G. *Phys. Rev. B* **1988**, *37*, 785.
- (12) Stephens, P. J.; Devlin, F. J.; Chabalowski, C. F.; Frisch, M. J. *J. Phys. Chem.* **1994**, *98*, 11623.
- (13) Weigend, F.; Ahlrichs, R. *Phys. Chem. Chem. Phys.* **2005**, *7*, 3297.
- (14) Neese, F.; Wennmohs, F.; Hansen, A.; Becker, U. *Chem. Phys.* **2009**, *356*, 98.
- (15) Weigend, F. *Phys. Chem. Chem. Phys.* **2006**, *8*, 1057.
- (16) Molekel. Advanced Interactive 3D-Graphics for Molecular Sciences, available at <<http://www.cscs.ch/molekel>>.
- (17) DeBeer George, S.; Petrenko, T.; Neese, F. *Inorg. Chim. Acta* **2008**, *361*, 965.
- (18) DeBeer George, S.; Petrenko, T.; Neese, F. *Phys. Chem. A* **2008**, *112*, 12936.
- (19) Neese, F. *Inorg. Chim. Acta* **2002**, *337*, 181.
- (20) Miralles, J.; Castell, O.; Caballol, R.; Malrieu, J. P. *Chem. Phys. Lett.* **1993**, *172*, 33.
- (21) Aboeella, N.; Lewis, E.; Reynolds, A.; Brennessel, W.; Cramer, C.; Tolman, W. *J. Am. Chem. Soc.* **2002**, *124*, 10660.
- (22) Fujisawa, K.; Tanaka, M.; Moro-oka, Y.; Kitajima, N. *J. Am. Chem. Soc.* **1994**, *116*, 12079.
- (23) Radón, M.; Broclawik, E.; Pierloot, K. *J. Phys. Chem. B* **2010**, *114*, 1518.
- (24) Chen, P.; Root, D.; Campochiaro, C.; Fujisawa, K.; Solomon, E. *J. Am. Chem. Soc.* **2003**, *125*, 466.
- (25) Cramer, C.; Tolman, W.; Theopold, K.; Rheingold, A. *Proc. Natl. Acad. Sci. USA* **2003**, *100*, 3635.
- (26) Sarangi, R.; Aboeella, N.; Fujisawa, K.; Tolman, W.; Hedman, B.; Hodgson, K.; Solomon, E. *J. Am. Chem. Soc.* **2006**, *128*, 8286.
- (27) Pierloot, K.; Zhao, H.; Vancoillie, S. *Inorg. Chem.* **2010**, *49*, 10316.
- (28) Roos, B. O.; Veryazov, V.; Conradie, J.; Taylor, P. R.; Ghosh, A. *J. Phys. Chem. B* **2008**, *112*, 14099.
- (29) Blair, R. A.; Goddard, W. A. *Phys. Rev. B* **1980**, *22*, 2767.
- (30) Kosugi, N.; Yokoyama, T.; Asakuna, K.; Kuroda, H. *Springer Proc. Phys.* **1984**, *2*, 55.
